# Supplementary material for: High-fat diet-induced upregulation of exosomal phosphatidylcholine contributes to insulin resistance
Source: PubMed Central journal article supplement (PMC7801461; doi:10.1038/s41467-020-20500-w), 2021-01-11
Supplement: 41467_2020_20500_MOESM1_ESM.pdf [file 41467_2020_20500_MOESM1_ESM.pdf]

## Supplemental Information

### High-fat diet-induced upregulation of exosomal phosphatidylcholine contributes to insulin resistance

Anil Kumar<sup>1</sup>, Kumaran Sundaram<sup>1</sup>, Jingyao Mu<sup>1</sup>, Gerald W Dryden<sup>1,2</sup>, Mukesh K Sriwastva<sup>1</sup>, Chao Lei<sup>1</sup>, Lifeng Zhang<sup>1</sup>, Xiaolan Qiu<sup>1</sup>, Fangyi Xu<sup>1</sup>, JunYan<sup>1</sup>, Xiang Zhang<sup>3</sup>, Juw Won Park<sup>4,5</sup>, Michael L Merchant<sup>6</sup>, Henry C. L. Bohler<sup>7</sup>, Baomei Wang<sup>8</sup>, Shuangqin Zhang<sup>9</sup>, Chao Qin<sup>10</sup>, Ziyang Xu<sup>10</sup>, Xianlin Han<sup>10</sup>, Craig J McClain<sup>2</sup>, Yun Teng<sup>1\*</sup>, and Huang-Ge Zhang<sup>1,11,12\*</sup>

<sup>1</sup> James Graham Brown Cancer Center, Department of Microbiology & Immunology, University of Louisville, KY 40202, USA

<sup>2</sup> Department of Medicine, University of Louisville, Louisville, KY 40202, USA

<sup>3</sup> Department of Pharmacology and Toxicology, University of Louisville, Louisville, KY 40202, USA

<sup>4</sup> Department of Computer Engineering and Computer Science, University of Louisville, KY 40202, USA

<sup>5</sup> KBRIN Bioinformatics Core, University of Louisville, Louisville, KY 40202, USA

<sup>6</sup> Kidney Disease Program and Clinical Proteomics Center, University of Louisville, Louisville, KY, USA

<sup>7</sup> Department of Reproductive Endocrinology and Infertility, University of Louisville, Louisville, KY40202, USA

<sup>8</sup> Department of Dermatology, University of Pennsylvania, Philadelphia, 19104, USA

<sup>9</sup> Peoples Cancer Institute, 215 Memorial Drive, Dalton, GA 30720 USA

<sup>10</sup> Barshop Institute for Longevity and Aging Studies, University of Texas Health Science Center at San Antonio, San Antonio, TX, 78229, USA

<sup>11</sup> Robley Rex Veterans Affairs Medical Center, Louisville, KY 40206, USA

<sup>12</sup> Lead contact

\* These authors jointly supervised this work

### CONTACT FOR REAGENT AND RESOURCE SHARING

Further information and request for reagents may be directed to lead contact,

Dr. Huang-Ge Zhang (h0zhan17@louisville.edu).

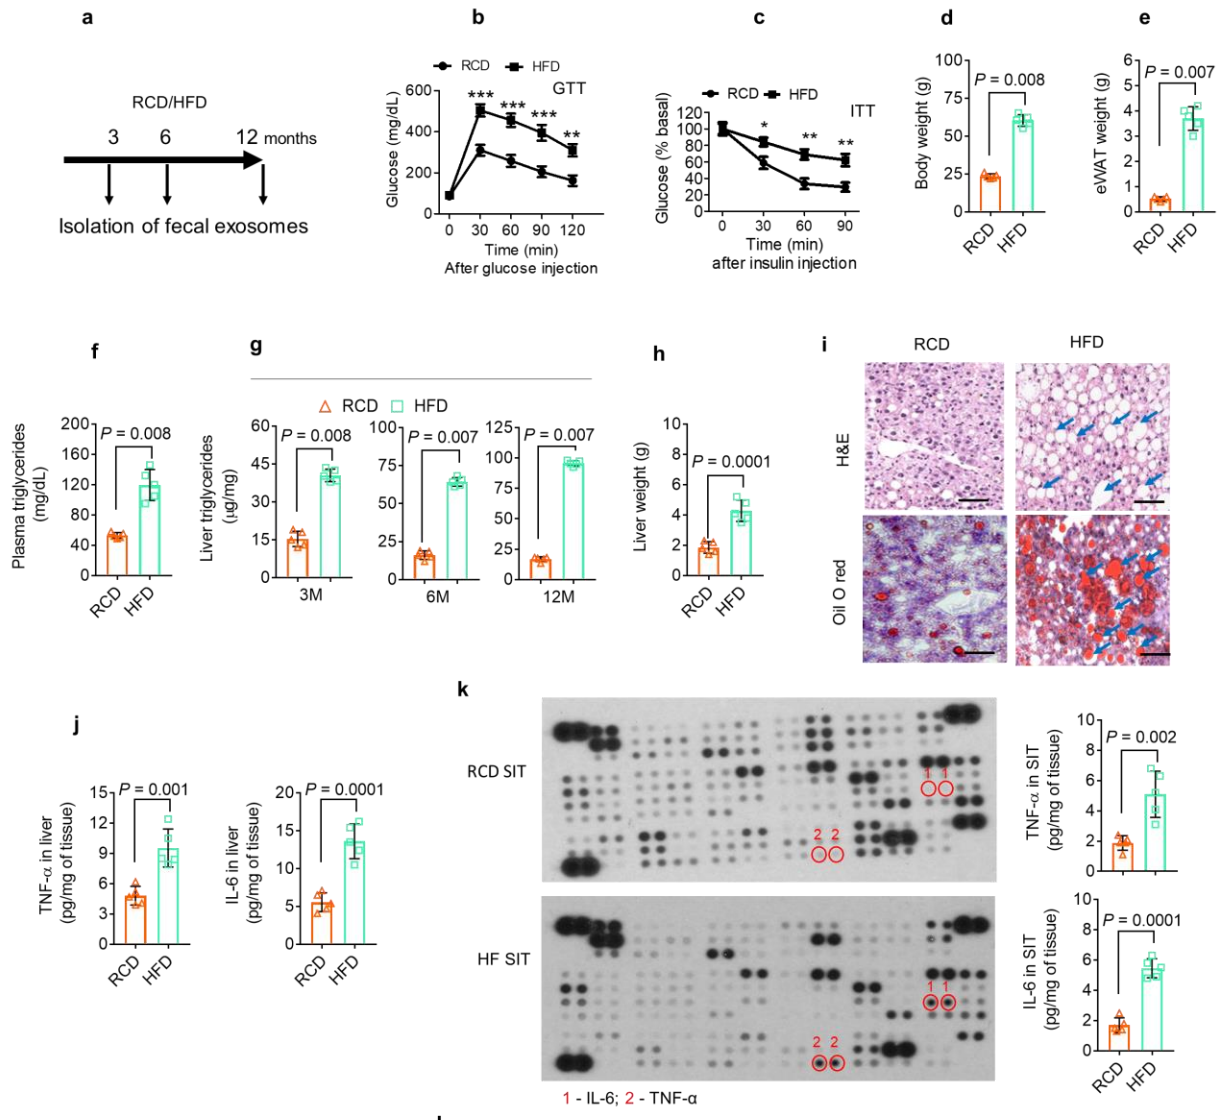

RCD small intestine tissues (SIT)

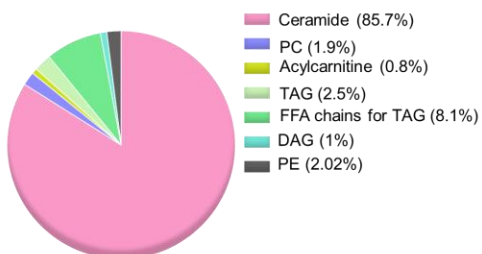

HFD SIT

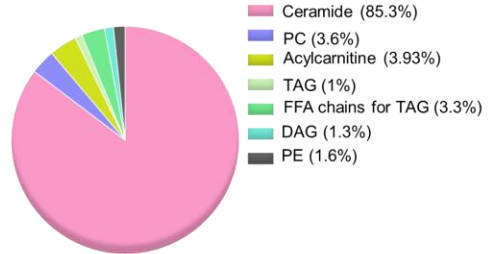

**Supplementary Figure 1: Long-term HFD feeding induced obesity, insulin and glucose intolerance, liver and small intestine tissue inflammation with lipid changes.**

**a.** Graphical presentation of the timeline over which mice were fed a regular chow diet (RCD) or high-fat diet (HFD). The downward arrows indicate the times at which exosome isolation from feces was conducted (n = 10 mice/group). **b.** GTT and **c.** ITT of RCD and HFD mice from which fecal exosomes were isolated (n = 10 mice/group). **d.** Body weight (n=5/group), hollow triangle - RCD fed mice and hollow rectangle - HFD fed mice. **e.** eWAT weight (n=5/group). **f.** Plasma triglycerides for 12M (months) HFD mice (n=5/group). **g.** Liver triglycerides (for models 3, 6 & 12M feeding either RCD or HFD) (n=5/group). **h.** Liver weight (n=5/group). **i.** H&E and oil red O staining of liver tissues. Blue arrows show lipid droplets. Scale bar is 20µm. Data is from experiments repeated at least three times. **j.** Inflammatory cytokines (TNF- $\alpha$  & IL-6) levels in liver tissues (n=5/group). **k.** Inflammatory cytokines (TNF- $\alpha$  & IL-6) levels in small intestine tissues (SIT). Quantification of TNF- $\alpha$  & IL-6 shown in right (n=5/group). **l.** Lipidomic analysis of bioactive lipids of SIT of RCD & HFD 12M fed mice. Data are presented as the mean  $\pm$  SD. Student's *t* test, two-tailed. \*<0.05; \*\*<0.01; \*\*\*<0.001; \*\*\*\*<0.0001. Source data are provided as a Source Data file.

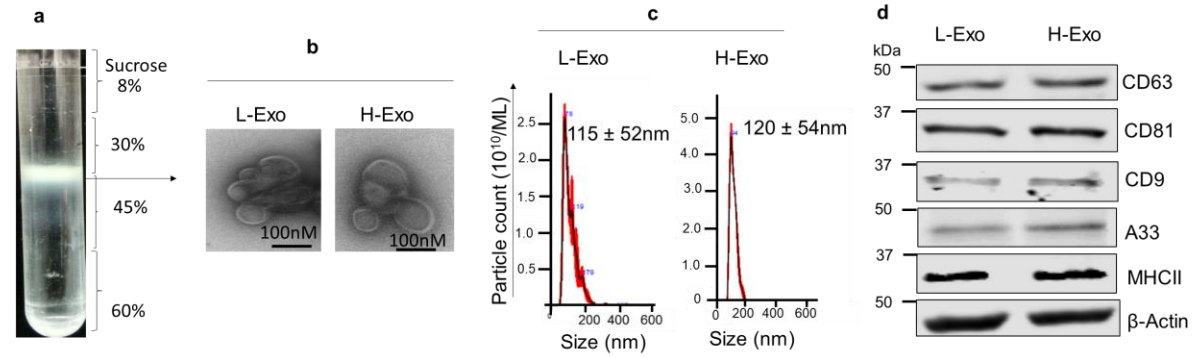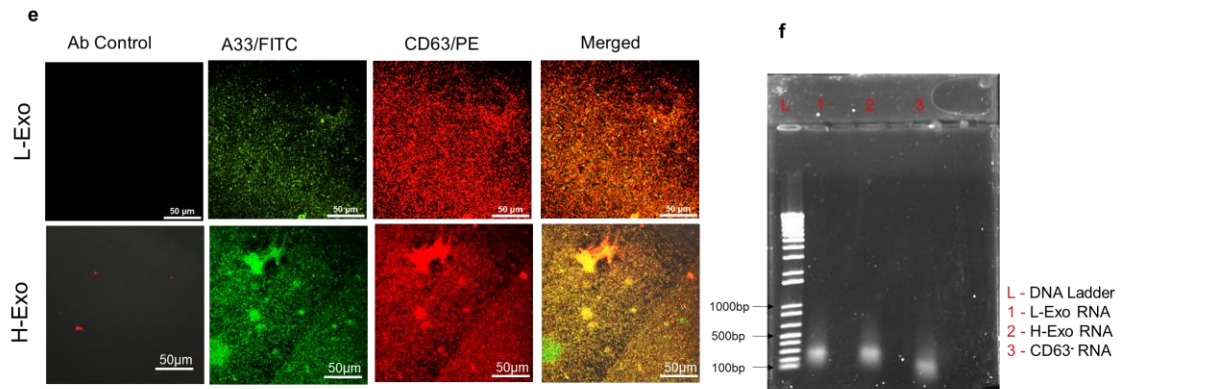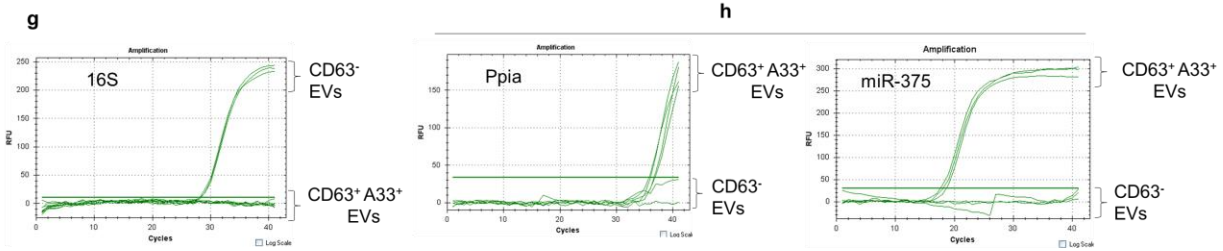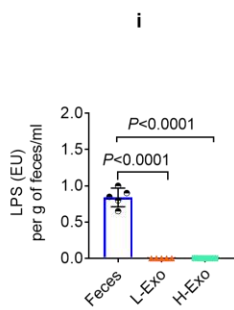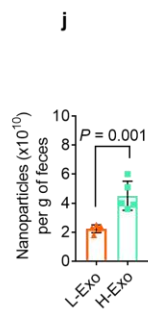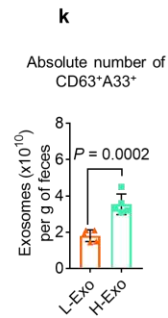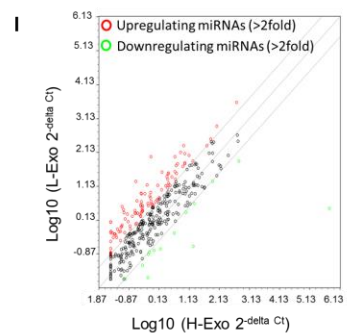

## Supplementary Figure 2: Characterization of mouse intestinal epithelial cells (IEC) released exosomes.

**a.** Representative image of sucrose gradient purification of H-Exo. The band at the interphase of 30% & 45% sucrose was used in downstream analysis. **b.** Electron microscopic images of exosomes from lean RCD mice (L-Exo) and HFD mice (H-Exo). Data is from experiments repeated at least three times. **c.** The exosome size was estimated using a Malvern NanoSight NS300 (Malvern Instruments). Data is from experiments repeated at least three times. **d.** Western blot images showing expression of CD63, CD81, CD9 (exosome marker) and A33 & MHCII (intestinal epithelial cell marker) on both L-Exo and H-Exo exosomes. Data is from experiments repeated at least three times. **e.** Exosomes were stained with A33 (green/FITC) and CD63 (red/PE) antibodies. Exosomes were analyzed by confocal microscopy. Scale bar as indicated. Data is from experiments repeated at least three times. **f.** Agarose gel profile for RNA extracted from CD63<sup>+</sup>A33<sup>+</sup> and CD63<sup>-</sup> EVs. Data from experiments repeated at least three times. **g.** qPCR amplification graph for 16S. **h.** Cyclophilin A (*Ppia*) and miR-375 with cDNA prepared from CD63<sup>+</sup>A33<sup>+</sup> and CD63<sup>-</sup>EVs RNA. **i.** LPS detection in pulled down CD63<sup>+</sup>A33<sup>+</sup> exosomes (n=5/group). Half-filled circle - feces, filled triangle - L-Exo and filled rectangle - H-Exo. **j.** Nanoparticle yield per gram of mouse feces was determined using the NS300 (n=5/group). **k.** Absolute number of CD63<sup>+</sup>A33<sup>+</sup> exosomes after pull-down was determined using the NS300 (n=5/group). **l.** Scatter plot showing levels of miRNA in L-Exo vs H-Exo. Data are presented as the mean  $\pm$  SD. Student's *t* test (two-tailed) and one-way ANOVA with Tukey post hoc test. Source data are provided as a Source Data file.

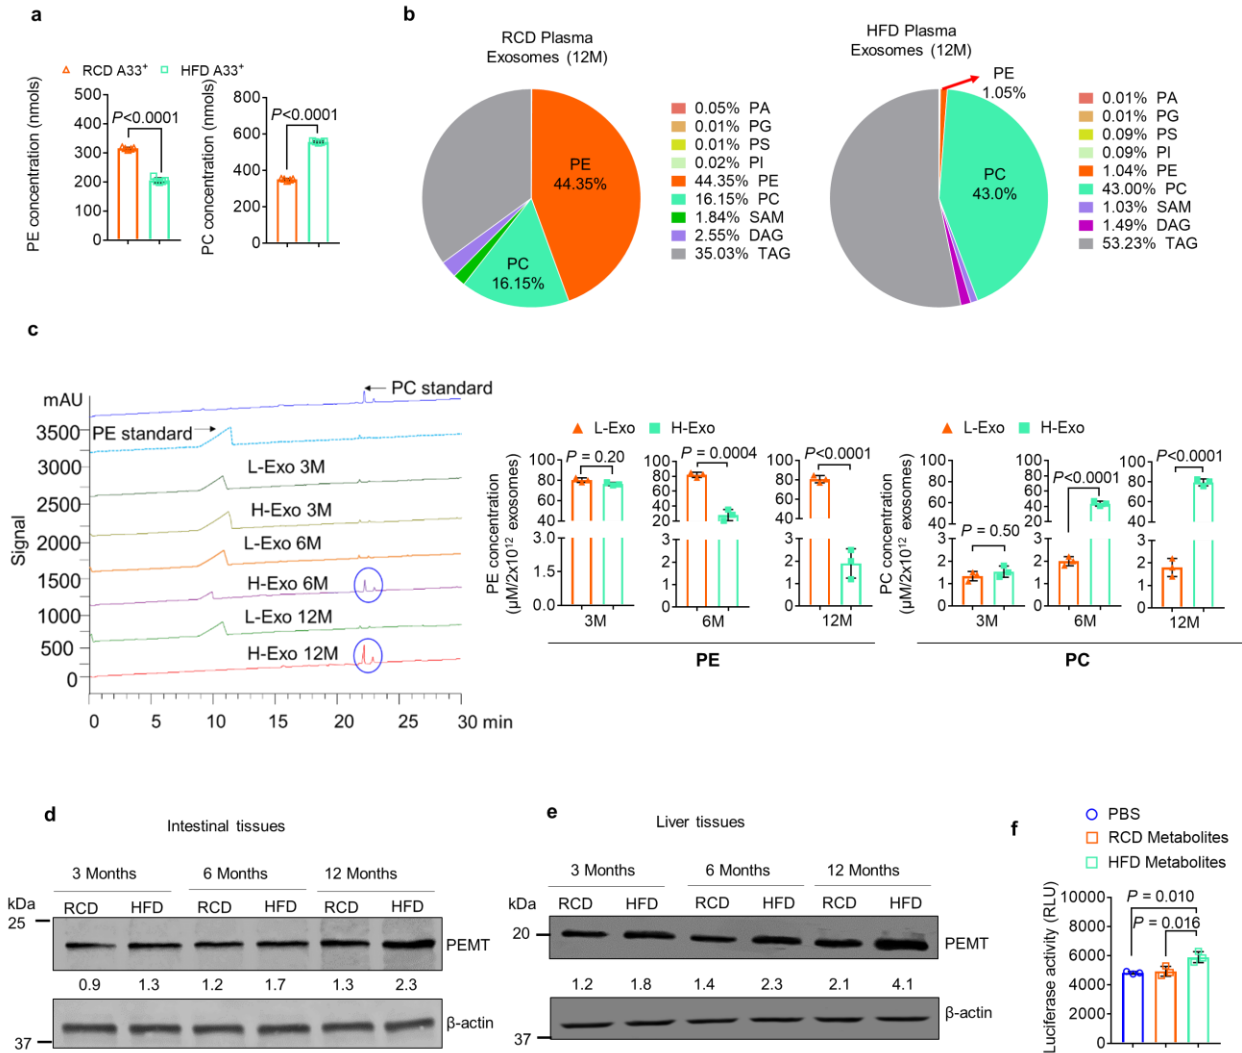

### Supplementary Figure 3: HFD led to increase the PC in plasma exosomes and intestinal epithelial cells (A33+).

**a.** Phosphatidylethanolamine (PE) and Phosphatidylcholine (PC) concentration (nmols) determined by triple quadrupole MS in FACS sorted A33<sup>+</sup> intestinal epithelial cells derived from mice (n=5/group) fed either a regular chow diet (RCD) or a high-fat diet (HFD) for 12 months. **b.** Lipids were extracted from plasma exosomes of mice fed either a RCD or a HFD for 12 months (n=10/group). Pie charts representing the percentage of each lipid, as determined using triple quadrupole mass spectrometry. **c.** Representative HPLC analysis of PE and PC lipids in mouse intestinal epithelial exosomes via detection of UV absorbance at 220 nm. PE and PC concentration shown at right (n=3). Filled triangle - L-Exo and filled rectangle - H-Exo. **d. & e.** immunoblots showing PEMT protein levels in mouse intestinal (**d**) and liver (**e**) tissue extracts after mice were fed either a RCD or HFD for 3, 6, or 12 months. Ratio to  $\beta$ -actin shown in the middle as numbers. Data is from experiments repeated at least three times. **f.** Mouse colon (MC-38) cells were transfected with pGL3B-PEMT-luc and treated with fecal metabolites from mice fed either a RCD or HFD for 12 months. Normalized luciferase activity was measured as an indication of

PEMT expression (n=3/group). Data are represented as mean  $\pm$  S.D. Student's *t* test (two-tailed) or one-way ANOVA with a Tukey post hoc test. Source data are provided as a Source Data file.

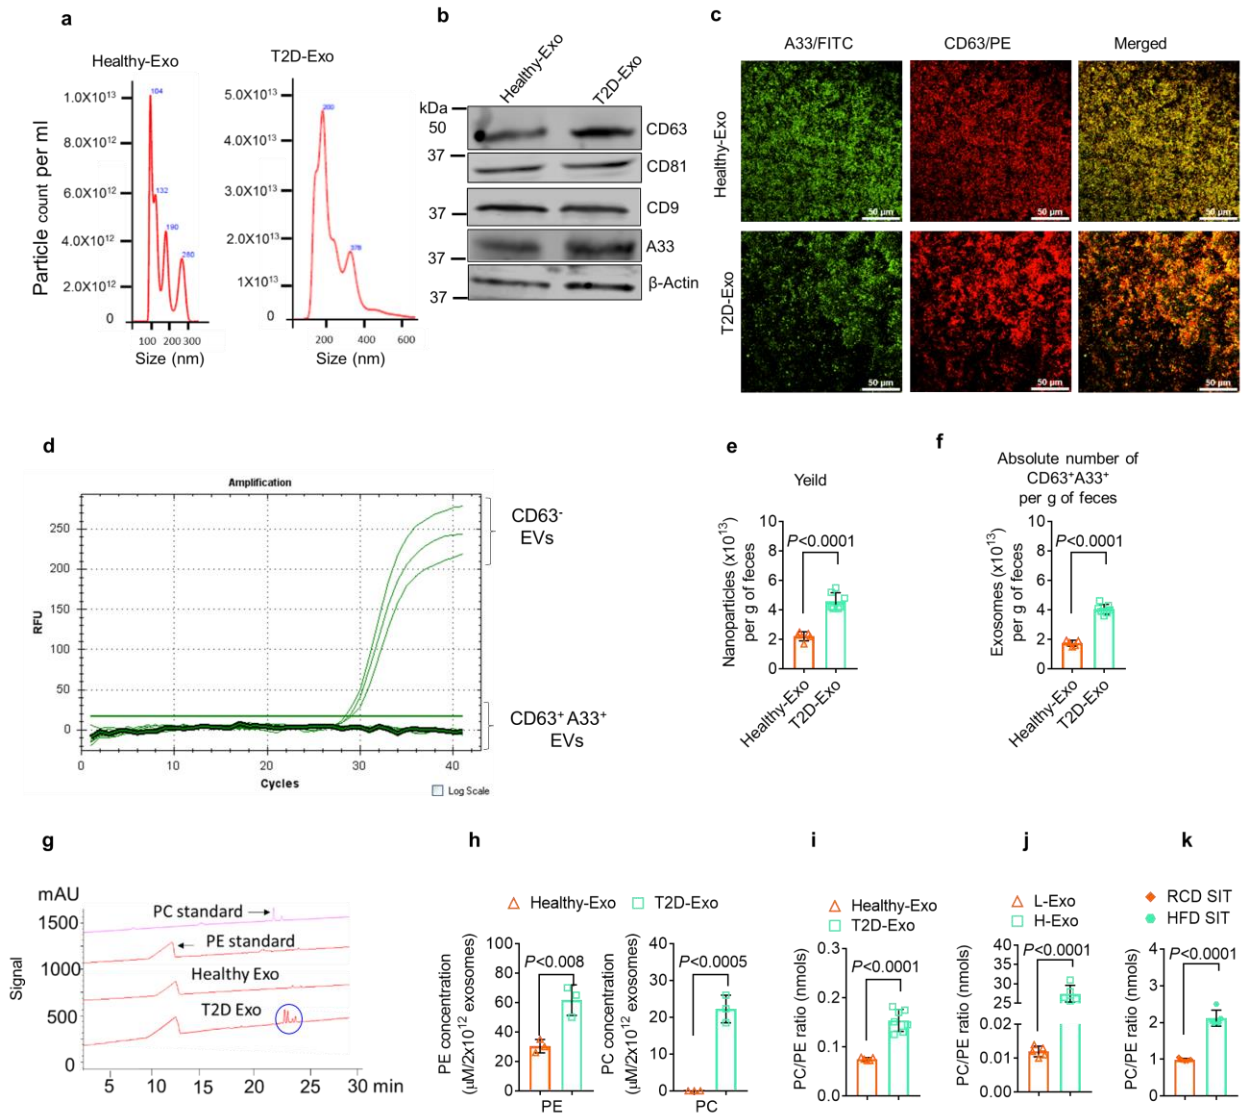

### Supplementary Figure 4: Characterization of human IEC released (CD63+A33+) exosomes.

**a.** The size of fecal exosomes isolated from healthy control (Healthy-Exo) and type 2 diabetic (T2D-Exo) humans was estimated using the NS300. **b.** Western blot images confirming expression of CD63, CD81, CD9 and A33 in human fecal exosomes. Data is from experiments repeated at least three times. **c.** Healthy control and T2D patient-derived exosomes were stained with A33 (green/FITC) and CD63 (red/PE) antibodies and analyzed using confocal microscopy. Scale bar as indicated. Data is from experiments repeated at least three times. **d.** qPCR amplification for 16S with cDNA prepared from CD63<sup>+</sup>A33<sup>+</sup> and CD63<sup>-</sup> EV RNA derived from human feces. **e.** Exosome yield was determined per gram of healthy individuals (n=5) and T2D patients (n=7) feces. Hollow triangle - Healthy-Exo and hollow rectangle - T2D-Exo. **f.** Absolute number of



exosomes after pull-down by CD63 and A33 (Healthy-Exo=5; T2D-Exo=7). **g.** HPLC analysis of PE and PC in human fecal exosomes from T2D patients and healthy controls. PE and PC concentration determined by HPLC (n=3/group). **i-k.** PC/PE ratio calculated using the data from triple quadrupole MS in human exosomes (Healthy-Exo=5; T2D-Exo=7; **i**), 12M mice (n=5) exosome (**j**) and small intestinal tissue (SIT; **k**). Filled diamond – RCD SIT and filled hexagon – HFD SIT. Data are presented as the mean  $\pm$  SD. Student's *t* test, two-tailed. Source data are provided as a Source Data file.

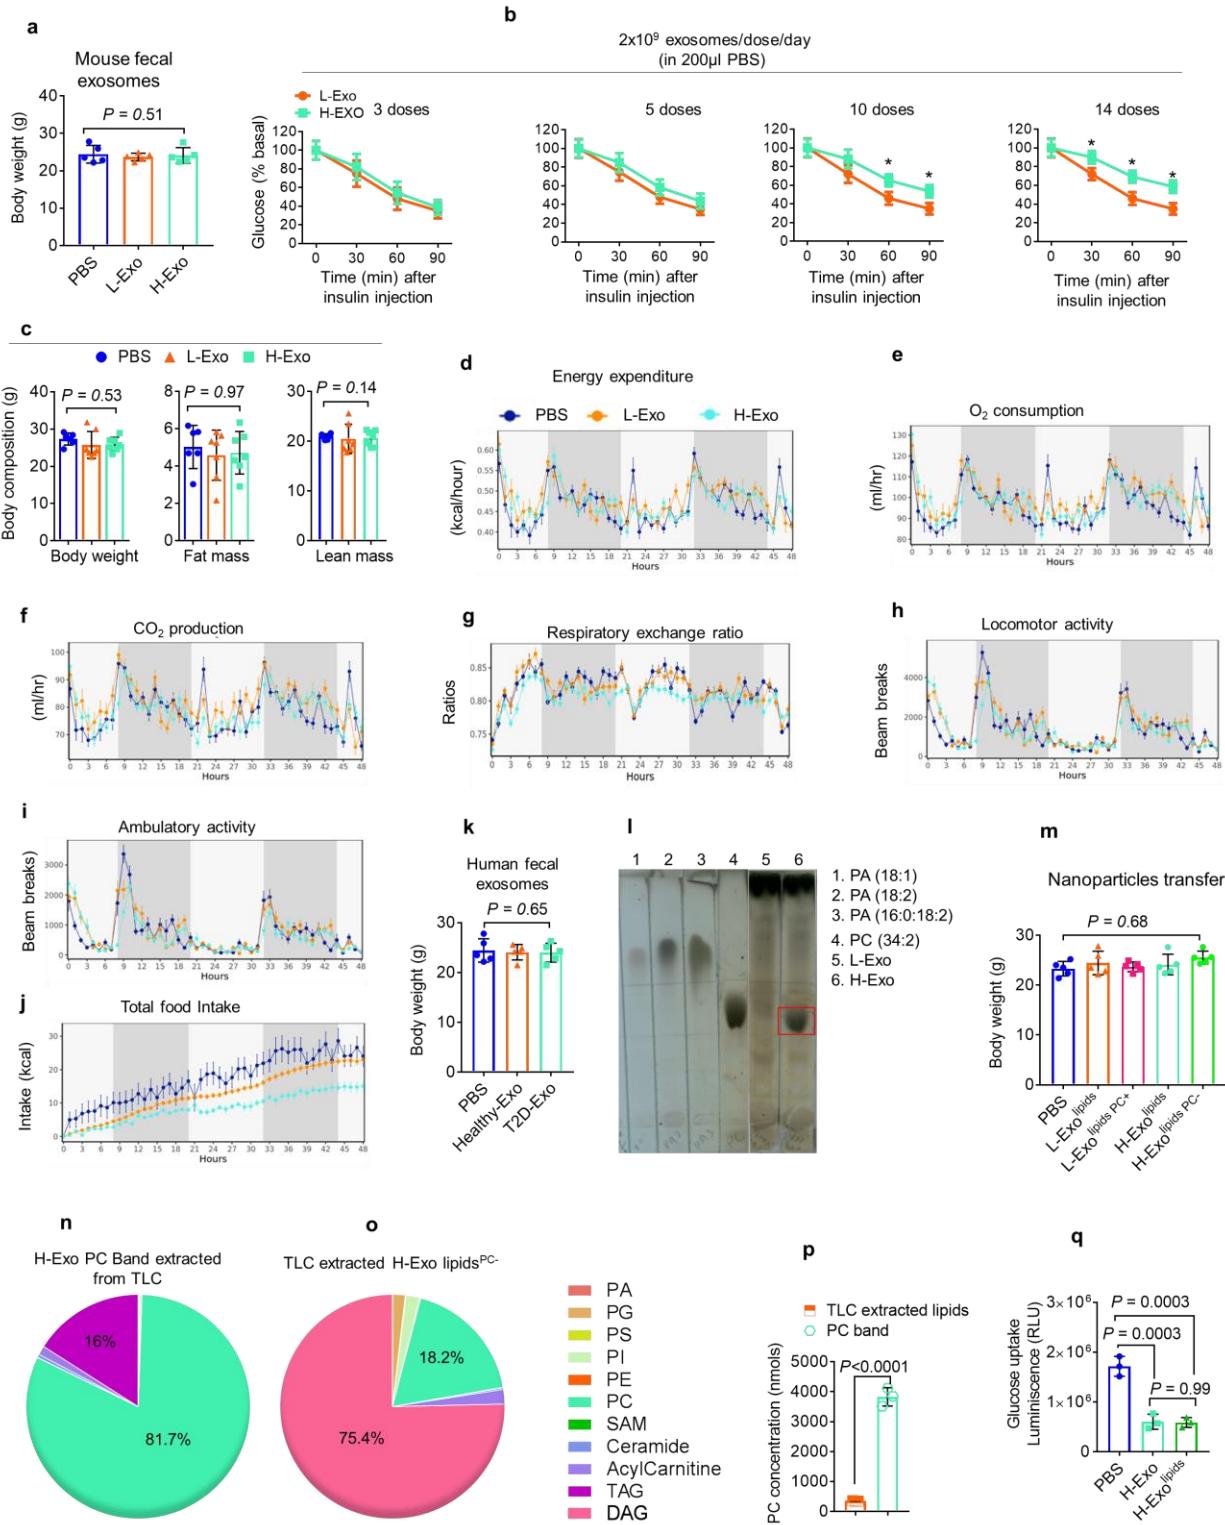

**Supplementary Figure 5: H-Exo oral administration has no impact on mice physiology other than glucose and insulin intolerance.**

**a.** Mice body weight after receiving PBS, L-Exo or H-Exo for 14 days while fed HFD. Filled circle – PBS; filled triangle - L-Exo and filled rectangle - H-Exo. **b.** H-Exo dose dependent impairment in insulin response in mice (n=5/group). **c.** Body composition (body weight, lean and fat mass) determined by NMR prior performing clamp assay (n=6/group). **d. – j.** Parameters associated with mouse physiology (energy expenditure, O<sub>2</sub> consumption, CO<sub>2</sub> production, respiratory exchange ratios, locomotor & ambulatory activities and food intake) assessed by metabolic cages (CLAMS). **k.** Body weight of mice receiving Healthy-Exo or T2D-Exo for 14 days while fed HFD (n=5/group). **l.** Thin layer chromatography (TLC) of total lipids from L-Exo or H-Exo indicating PC band along with standard PA and PC. **m.** Mice body weight after receiving nanoparticles (generated from total lipids from L-Exo or H-Exo and PC depleted or added lipids) for 14 days while fed HFD (n=5/group). **n.** Pie charts of lipids from PC band (PCB; depleted as shown red rectangle in panel l). **o.** Pie charts of lipids quantified by quadrupole MS of remainder lipids (TLC extracted H-Exo lipids<sup>PC-</sup>). **p.** Quantitative analysis of PC concentration in TLC extracted lipids after PC band depletion; PC band analyzed by triple quadrupole MS (n=3). **q.** Glucose uptake by FL83B cells treated (n=3) with H-Exo or its total lipids (H-Exo<sup>nano</sup>). Data are presented as the mean ± SD. One-way ANOVA with a Bonferroni or Tukey post hoc test and Student's *t* test, two-tailed. Source data are provided as a Source Data file.

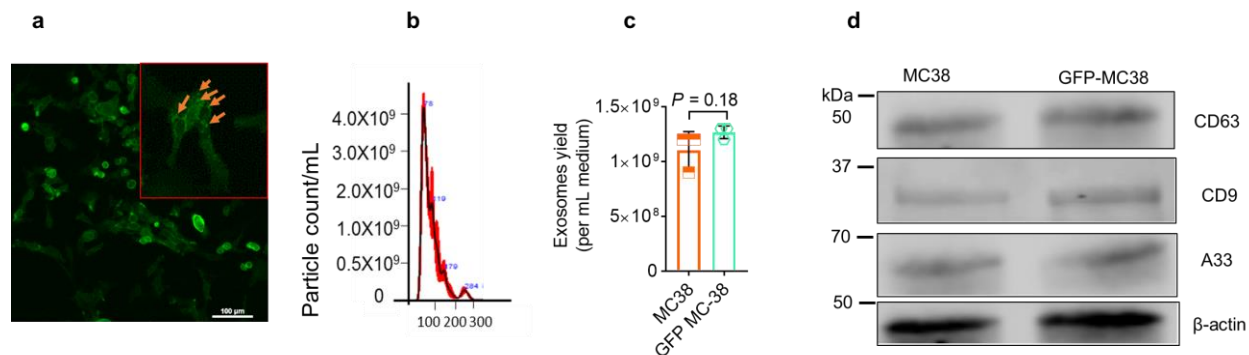

**Supplementary Figure 6: Characterization of GFP-MC38 released exosomes.**

**a.** Live cell imaging of GFP-MC38 cells releasing GFP positive exosomes shown by orange arrows (inset). Scale bar as indicated. Data is from experiments repeated at least three times. **b. & c.** Size (**b**) and yield (**c**) estimation of exosomes from culture supernatant of WT MC38 and GFP-MC38 cells as assessed using the NS300 (n=3). **d.** Western blot analysis of CD63, CD9 and A33 expression on WT MC38 and GFP-MC38-released exosomes. Data is from experiments repeated at least three times. Data are presented as the mean  $\pm$  SD. Student's *t* test, two-tailed. Source data are provided as a Source Data file.

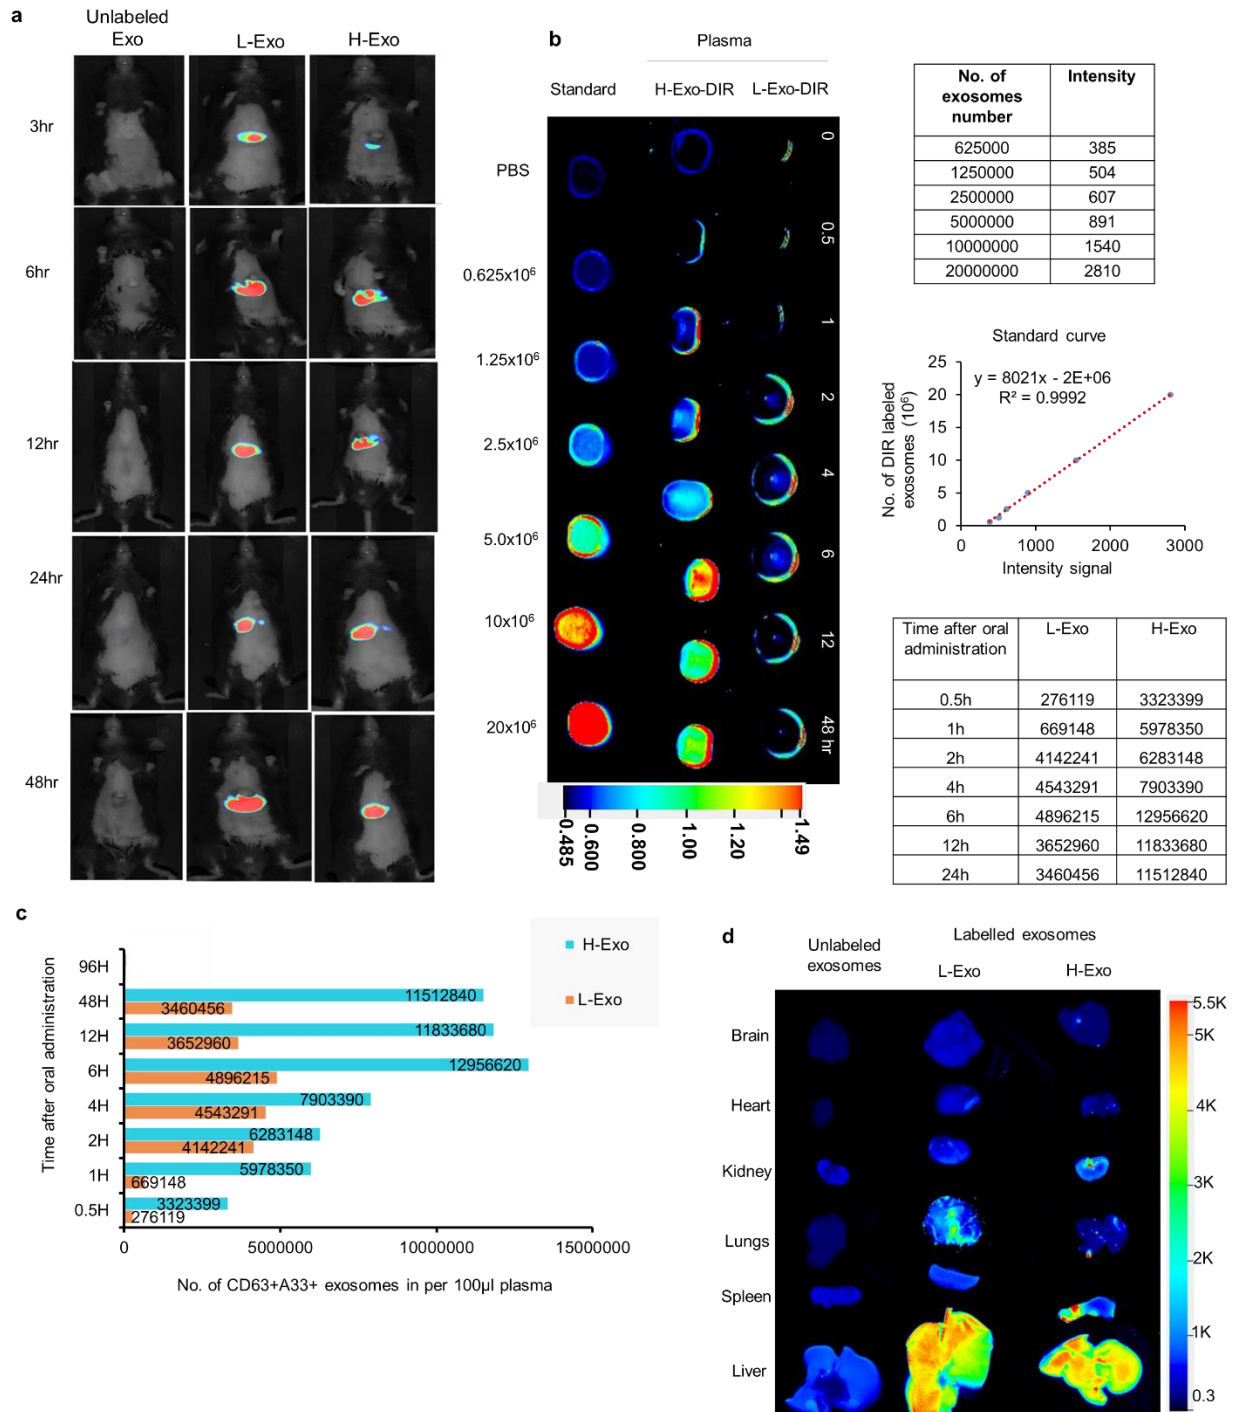

**Supplementary Figure 7: CD63<sup>+</sup>A33<sup>+</sup> exosomes preferential targets the liver via circulation.**

**a.** Live imaging of mice orally gavaged with DIR-labelled exosomes at different time intervals. **b.** DIR labeled CD63<sup>+</sup>A33<sup>+</sup> exosomes detected in plasma at different time points. Standard curve was prepared with known numbers of DIR labeled exosomes. **c.** Numbers of exosomes were calculated with signal intensity in plasma. **d.** Scanned images of preferential localization of both L-Exo and H-Exo to the liver. Data is from experiments repeated at least three times.

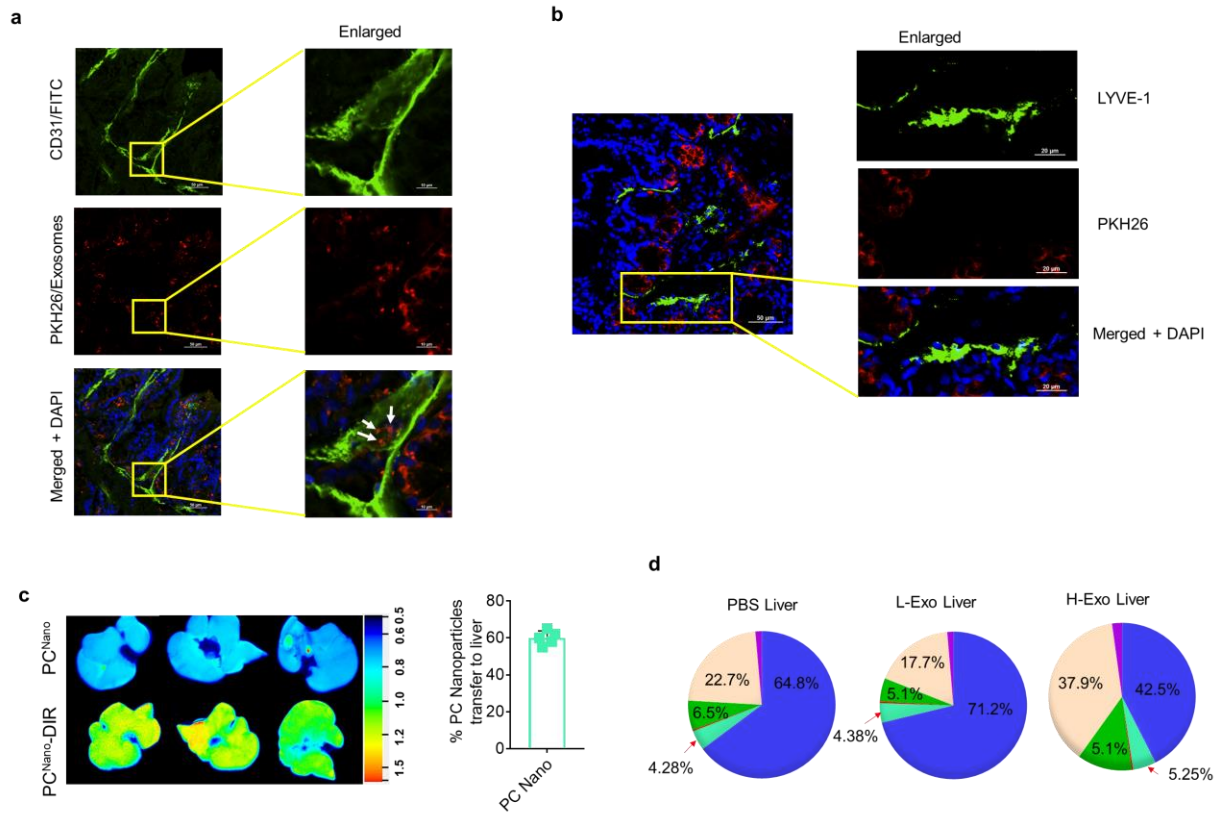

**Supplementary Figure 8: Exosomes trafficked from gut to liver via the portal vein but not through the lymphatic circulation.**

**a. – b.** Confocal image analysis of frozen sections of intestines from mice orally gavaged with PKH-26 labeled exosomes ( $2 \times 10^9$ ) after immunofluorescent staining for CD31 (**a**; white arrows) and LYVE-1 (**b**) with enlargement of indicated area shown in the right panel. Scale bar as indicated. Data is from experiments repeated at least three times. **c.** Detection of fluorescent (DIR) PC (34:2) nanoparticles in liver. Percentages shown at right ( $n=5$ ). **d.** Pie charts representing the targeted lipidomics of liver tissue from PBS, L-Exo or H-Exo recipient mice for 14 days. Data are represented as mean  $\pm$  SD. Data is from experiments repeated at least three times.

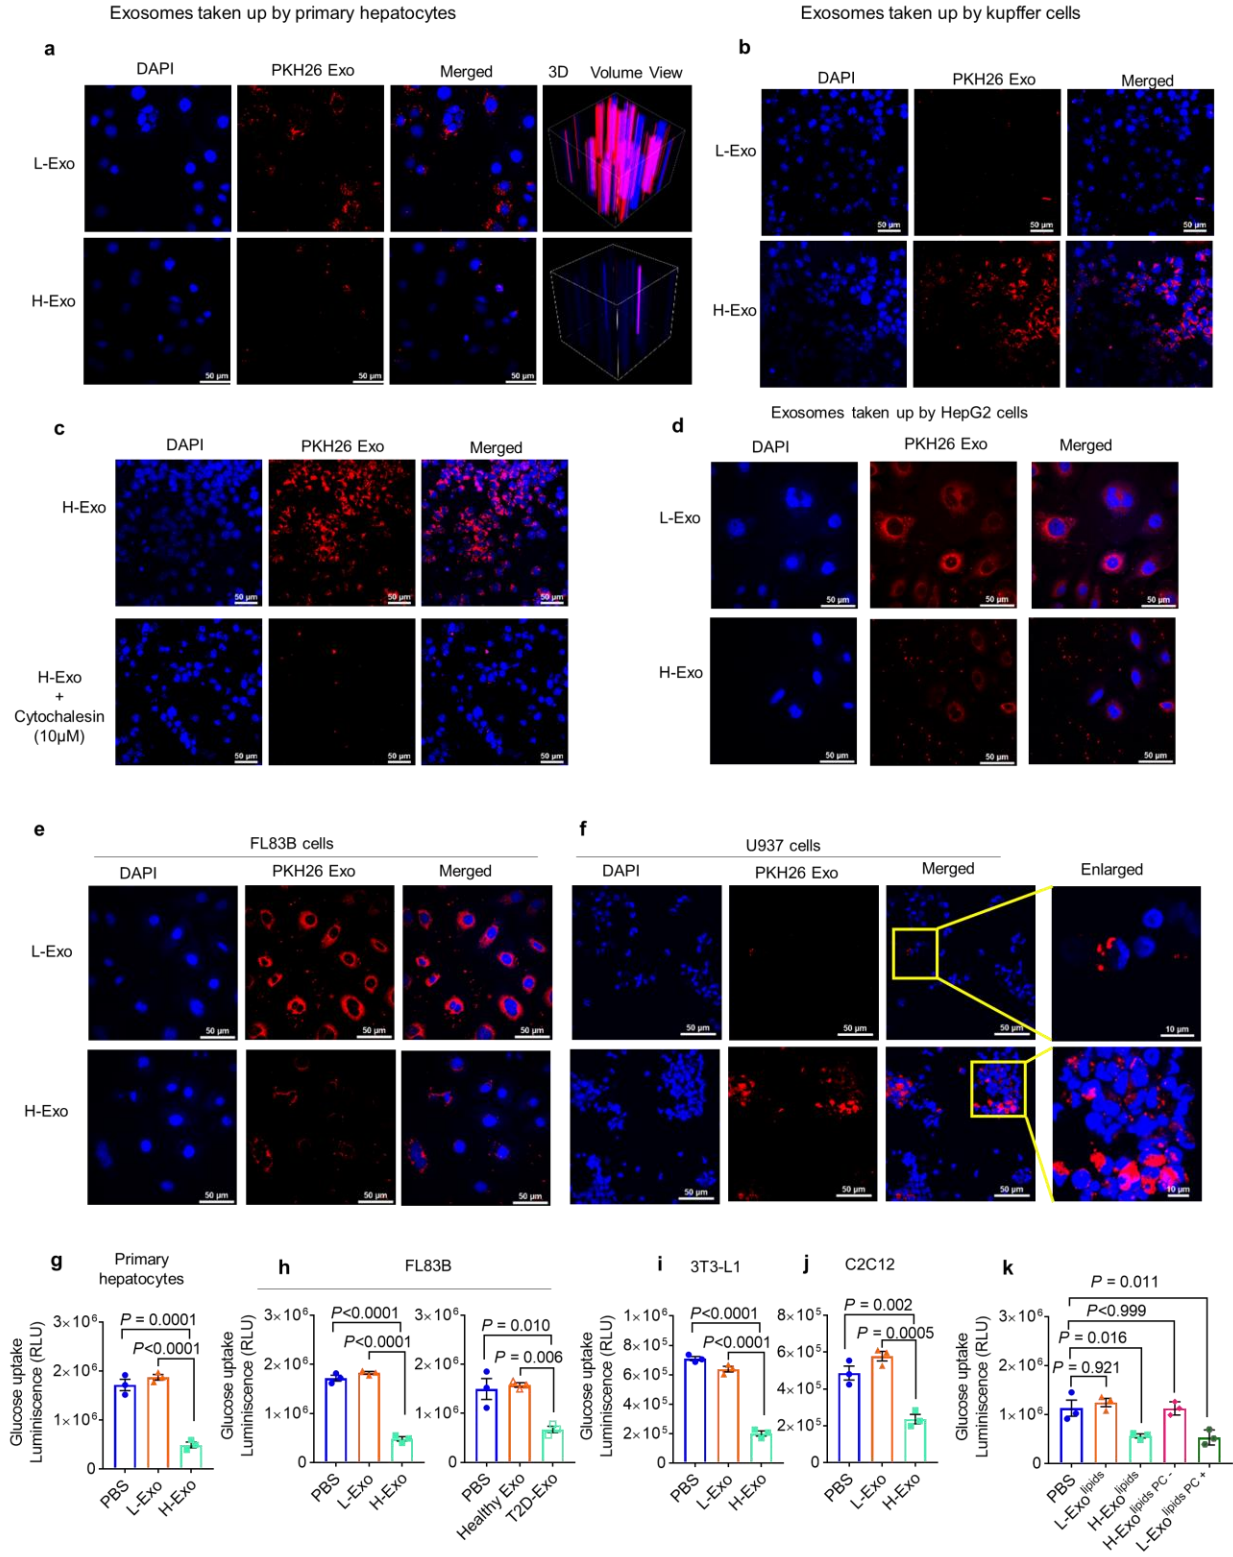



### Supplementary Figure 9: Liver cells uptake of L-Exo versus H-Exo.

**a.** Visualization of in vitro uptake of PKH26-labelled L-Exo or H-Exo by mouse primary hepatocytes with accompanying 3D images. Scale bar as indicated. **b.** In vitro uptake of PKH26-labeled L-Exo or H-Exo by mouse Kupffer cells. **c.** Inhibition of phagocytosis by cytochalasin D in mice Kupffer cells. **d. – f.** Uptake of PKH26-labelled L-Exo or H-Exo by human hepatocytes (HepG2 cells; **d**), mouse hepatocyte (FL83B; **e**) and human monocyte cell (U937; **f**) lines. **g.** Glucose uptake assays performed on mouse primary hepatocytes cultured with PBS and CD63<sup>+</sup>A33<sup>+</sup> mouse exosomes (L-Exo and H-Exo) for 16 hours (n=3). Filled circle – PBS; filled triangle - L-Exo and filled rectangle - H-Exo. **h. – j.** Glucose uptake assay of mouse hepatocytes (FL83B; **h**), adipocyte (3T3-L1; **i**) and skeletal muscle (C2C12; **j**) cell lines cultured with CD63<sup>+</sup>A33<sup>+</sup> exosomes for 16 hours (n=3). Hollow triangle - Healthy-Exo and hollow rectangle - H-Exo. **k.** Nanoparticles generated from total lipids, PC depleted & added lipids of CD63<sup>+</sup>A33<sup>+</sup> exosomes. Glucose uptake assay of mouse primary hepatocytes cultured with nanoparticles for 16 hours (n=3). Data are represented as mean  $\pm$  SD. One-way ANOVA with a Tukey post hoc test. Source data are provided as a Source Data file. Data is from experiments repeated at least three times.

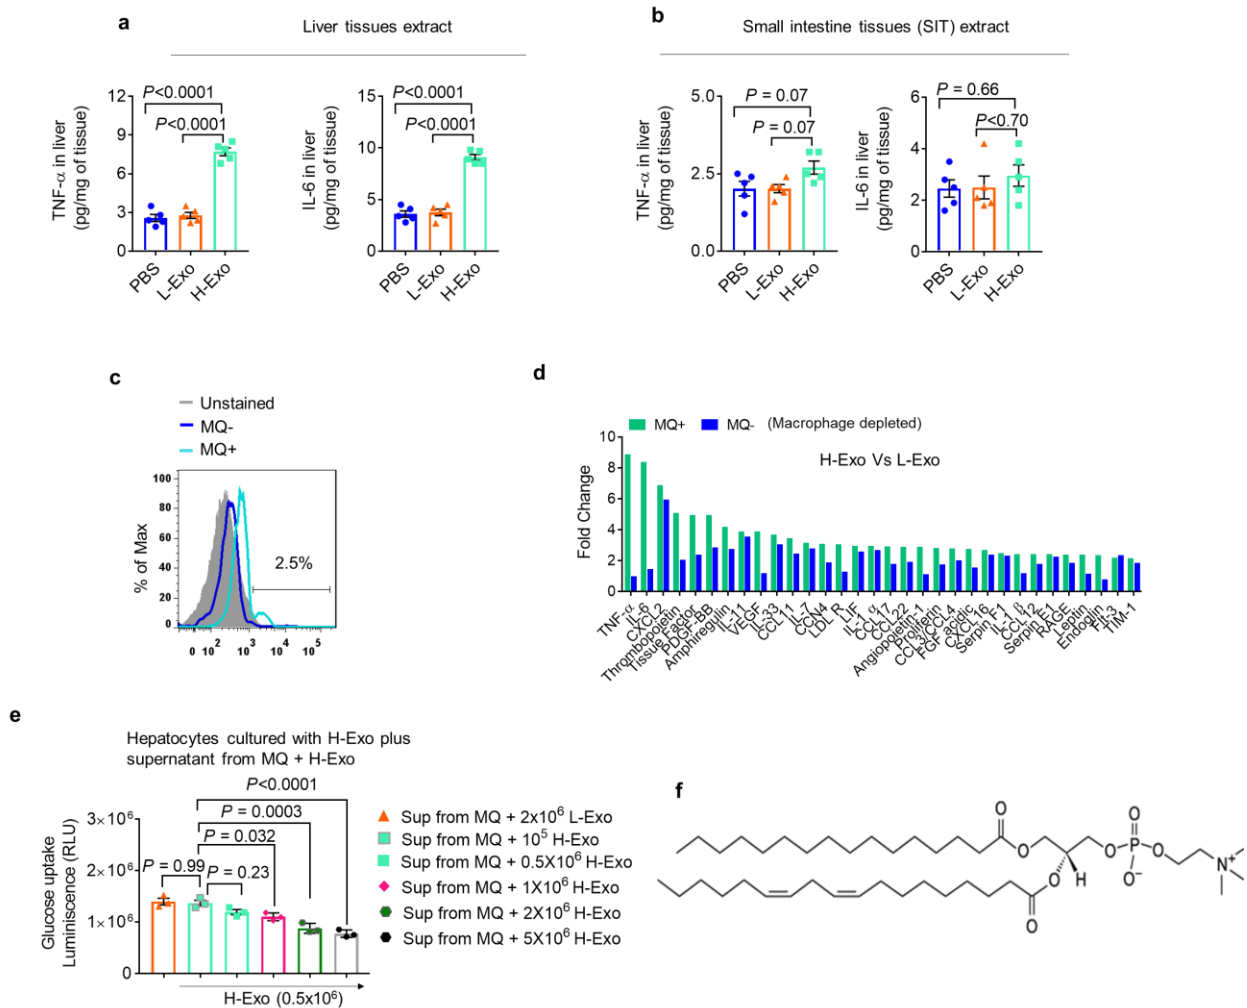

### Supplementary Figure 10: H-Exo induce inflammation in liver and WAT but not in intestinal tissues of recipient mice.

**a. – b.** Inflammatory cytokines (TNF- $\alpha$  & IL-6) in liver (**a**) and in small intestine tissues (**b**) quantified by ELISA (n=5). Filled circle – PBS; filled triangle - L-Exo and filled rectangle - H-Exo. **c.** Macrophage (MQ) depletion by a single injection of clodrosomes<sup>R</sup> as assessed by flow cytometry for whole blood staining of F4/80. **d.** Fold change in H-Exo vs L-Exo-induced cytokines levels in mouse plasma with or without macrophage depletion. **e.** Glucose uptake assay (n=3) performed on mouse hepatocytes supplemented with supernatant derived from macrophages cultured with nanoparticles derived from H-Exo total lipids (H-Exo Nano) and PC (34:2). **f.** Fatty acid structure of PC (34:2) purchased from Avanti Polar Lipids Inc. Data are represented as mean  $\pm$  SD. One-way ANOVA with a Tukey post hoc test. Source data are provided as a Source Data file.

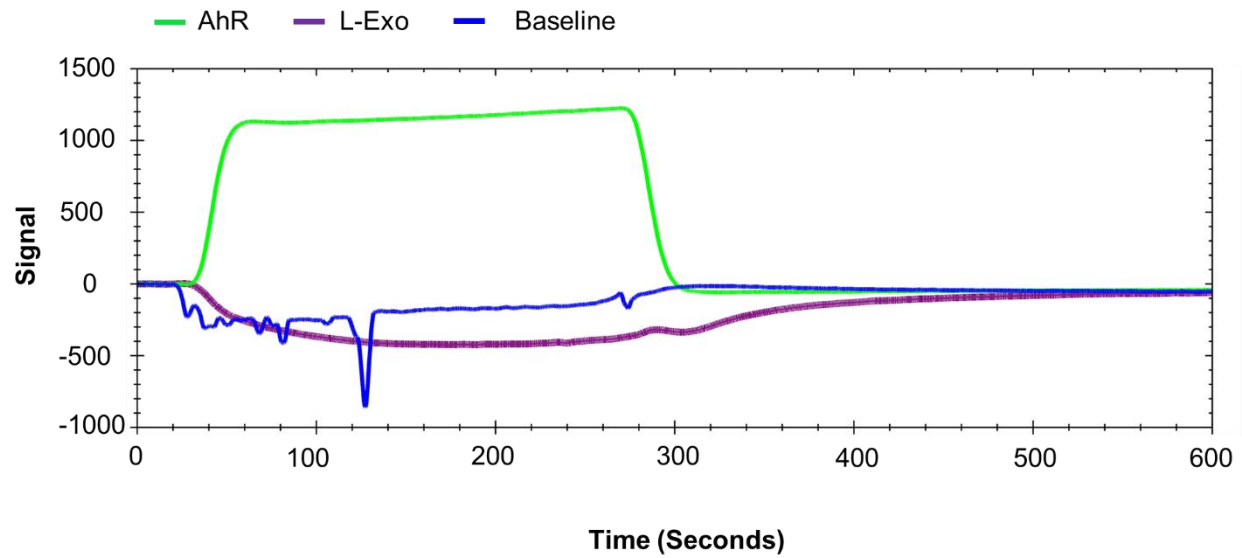

**Supplementary Figure 11: SPR sensogram showing no interaction of AhR with L-Exo.**

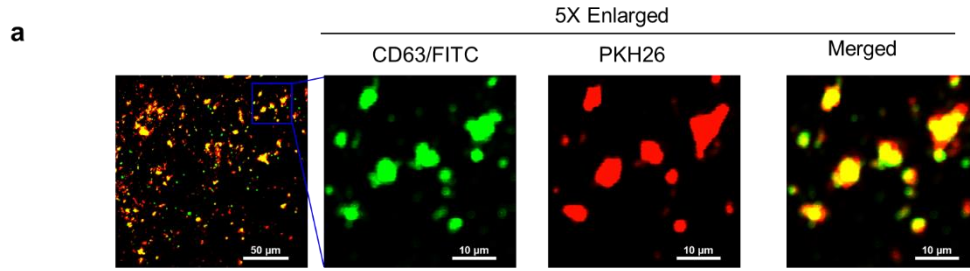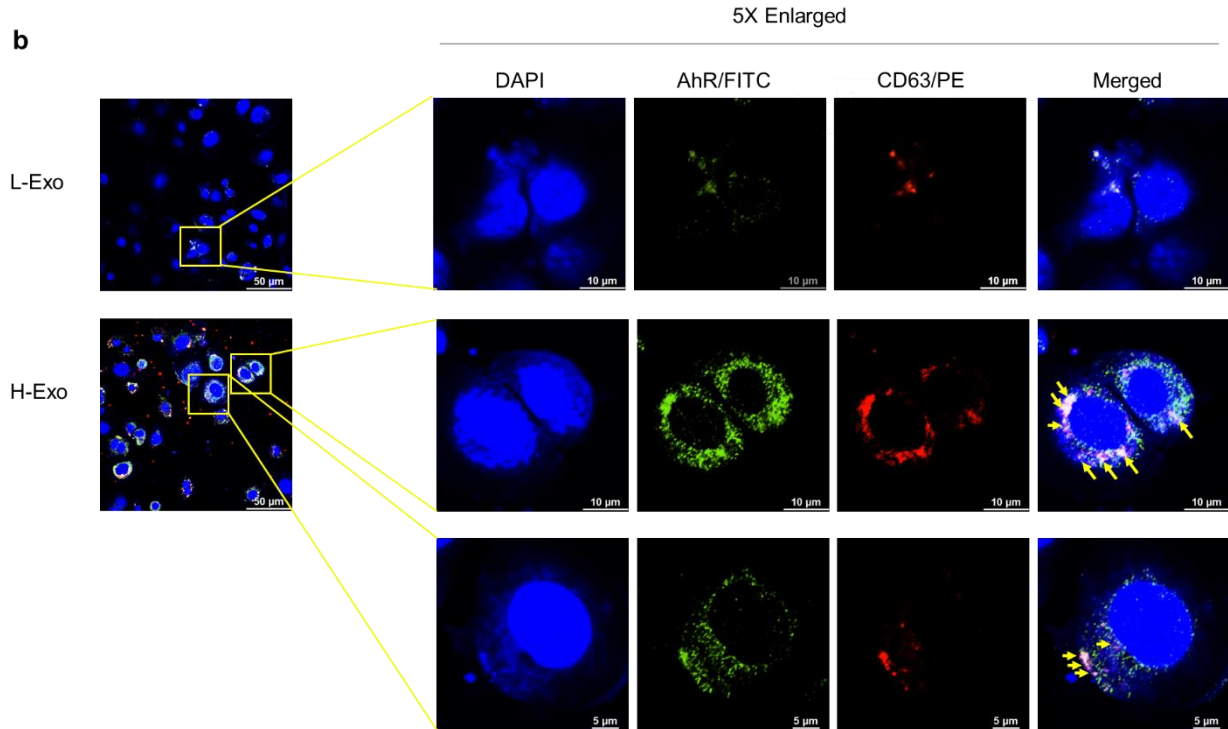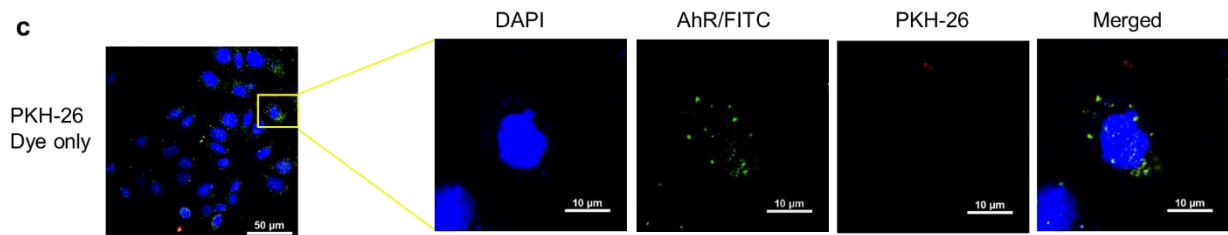

**Supplementary Figure 12: Co-location of PKH-26 dye signal with exosomal marker on H-Exo.**

**a.** PKH-26 dye signals co-localized with the CD63 exosomal marker on H-Exo. Scale bar as indicated. **b.** L-Exo or H-Exo interaction with AhR in FL83B cells as indicated by the yellow arrows. Scale bar as indicated. **c.** Only PKH-26 dye in the cell culture. Scale bar as indicated. Data is from experiments repeated at least three times.

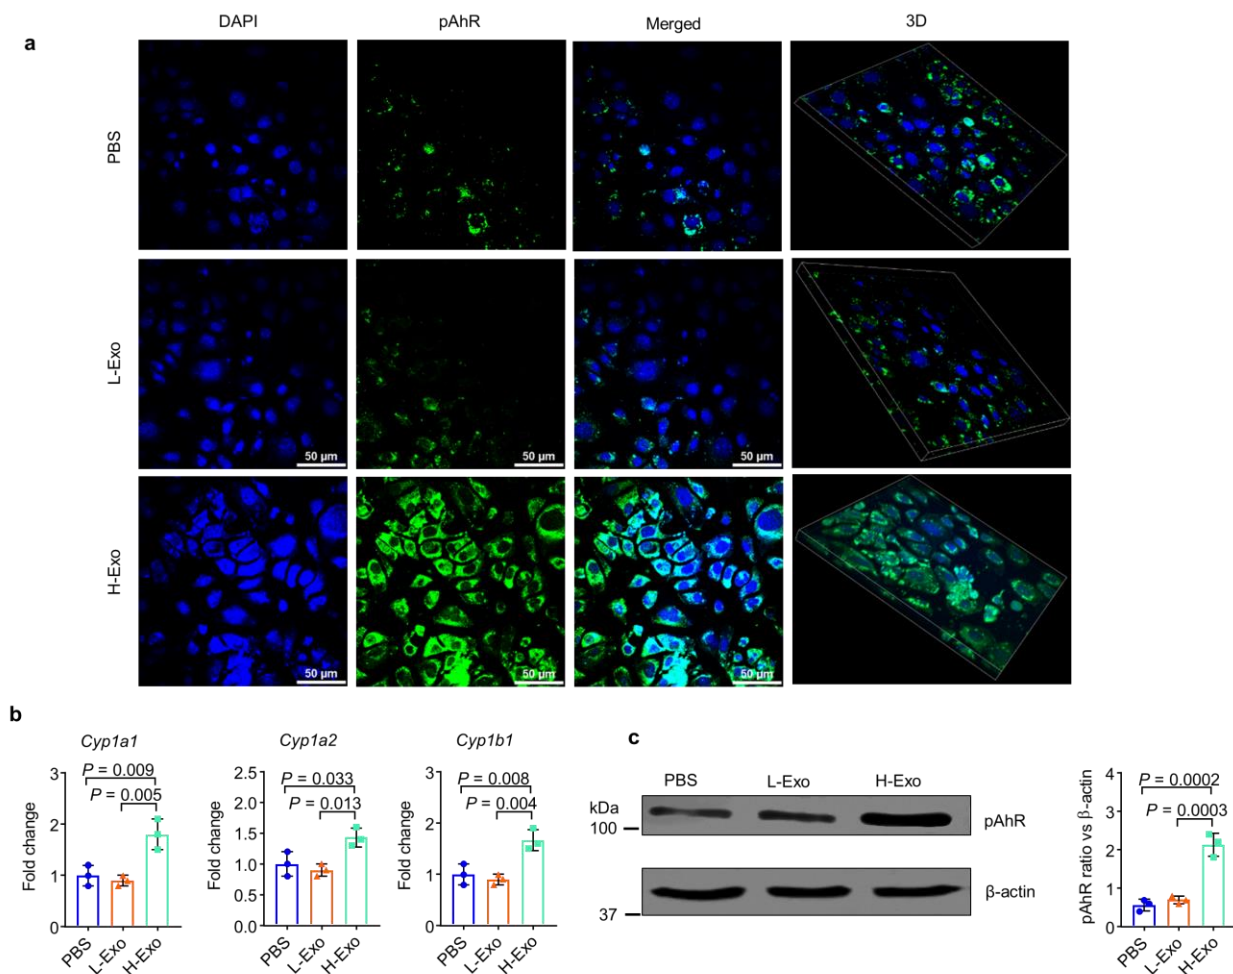

### Supplementary Figure 13: H-Exo induced pAhR expression in hepatocytes.

**a.** Mouse hepatocytes (FL83B cells) were cultured with L-Exo and H-Exo for 16 hours and induction of pAhR in the nucleus was visualized by confocal microscopy. 3D image shown at right. Scale bar as indicated. **b.** qPCR of AhR downstream genes *Cyp1a1*, *Cyp1a2* and *Cyp1b1* (n=3). Filled circle – PBS; filled triangle - L-Exo and filled rectangle - H-Exo. **c.** Depicting the western blot images of pAhR expression in primary hepatocytes cultured with H-Exo for 16 hours. Ratio to β-actin shown in the right (n=3). Data are represented as mean ± SD. One-way ANOVA with a Tukey post hoc test. Source data are provided as a Source Data file. Data is from experiments repeated at least three times.

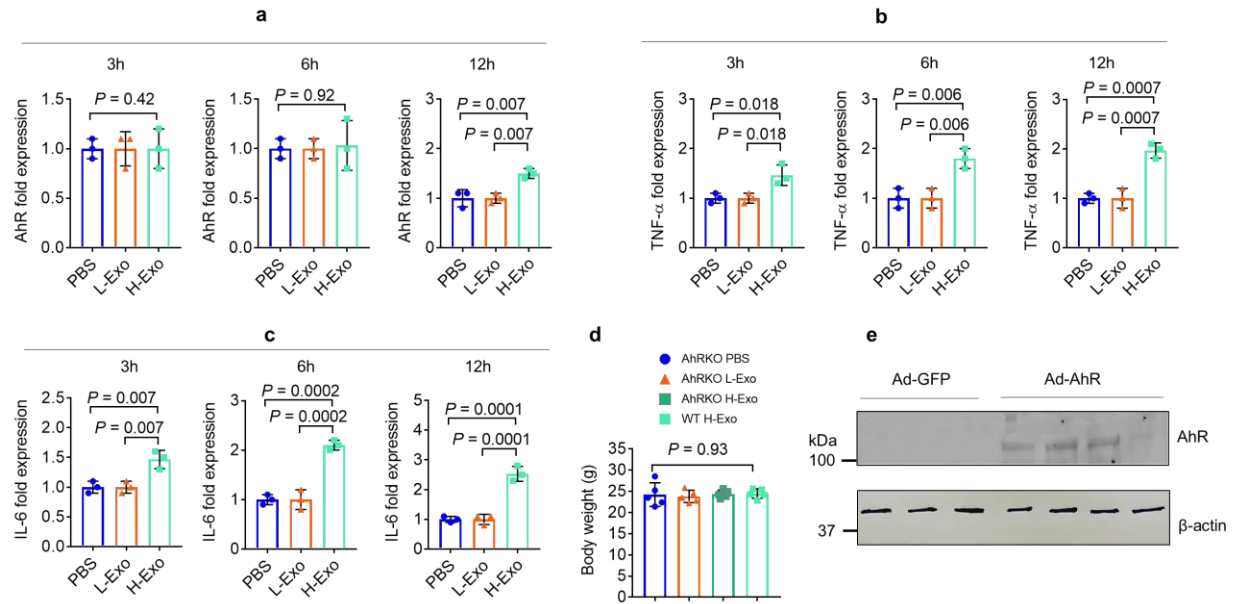

### Supplementary Figure 14: H-Exo mediated alteration of inflammatory cytokines gene expression in macrophages.

**a. – c.** qPCR analysis of *AhR* (**a**), *TNF-α* (**b**) and *IL-6* (**c**) gene in Kupffer cells cultured with PBS, L-Exo or H-Exo for 3h, 6h and 12h (n=3). Filled circle – PBS; filled triangle - L-Exo and filled rectangle - H-Exo. **d.** Body weight of *AhR*<sup>-/-</sup> mice receiving PBS, L-Exo and H-Exo for 14 days while fed HFD (n=5). **e.** Re-expression of AhR in hepatocyte of *AhR*<sup>-/-</sup> mice by adenovirus injected (5x10<sup>9</sup> pfu) via the tail vein was confirmed by western blot. Data is from experiments repeated at least three times. Data are represented as mean ± SD. One-way ANOVA with a Tukey post hoc test. Source data are provided as a Source Data file.

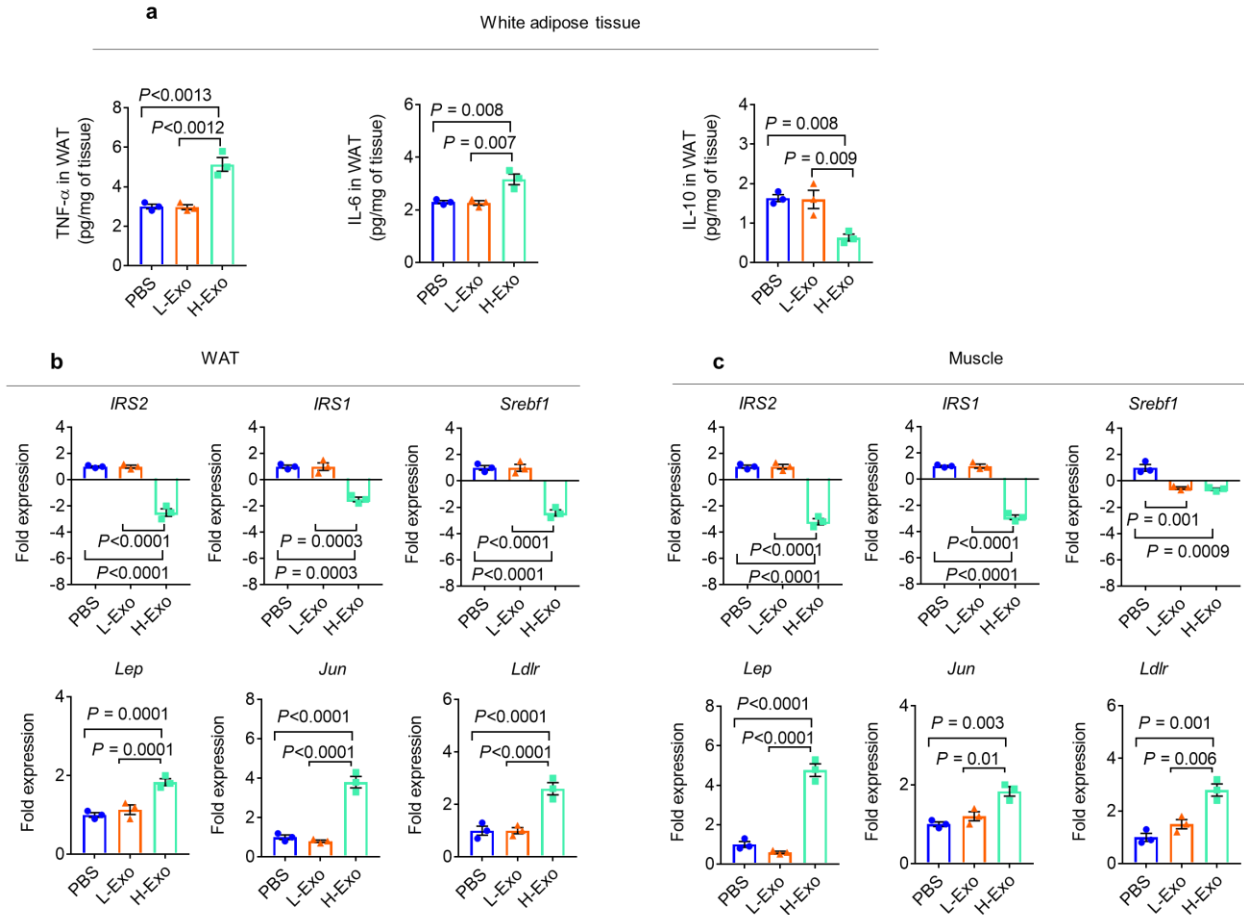

**Supplementary Figure 15: H-Exo mediated alteration the expression of cytokines and genes in WAT and muscle tissue.**

**a.** TNF- $\alpha$ , IL-6 and IL-10 measured by ELISA in WAT extracts derived from mice treated with PBS, L-Exo or H-Exo (n=3). Filled circle – PBS; filled triangle - L-Exo and filled rectangle - H-Exo. **b.** & **c.** Up- or downregulated genes in WAT (**b**) and muscle tissues (**c**) derived from mice treated with PBS, L-Exo, and H-Exo for 14 days (n=3). Data are presented as the mean  $\pm$  SD. One-way ANOVA with a Tukey post hoc test.; Source data are provided as a Source Data file.



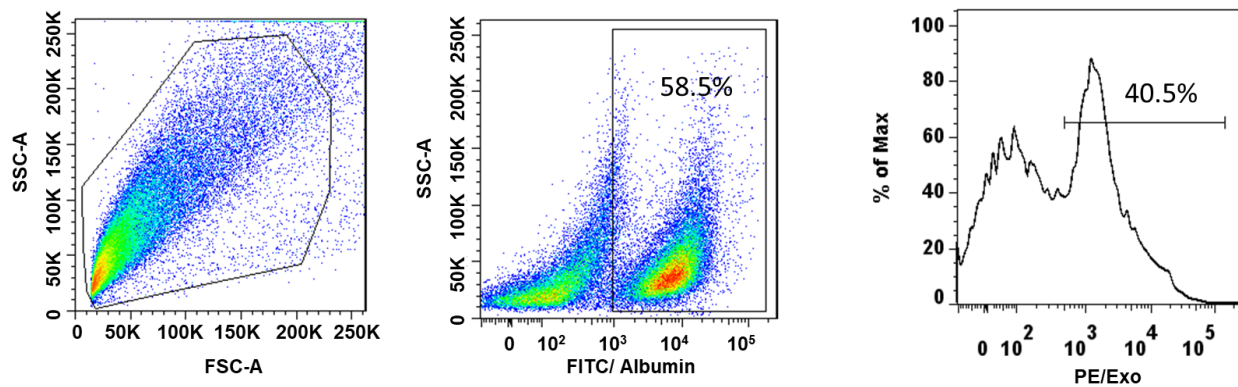

**Supplementary Figure 16: Gating strategy for flow cytometric analysis of exosome uptake by liver cells as shown in Figure 3.**

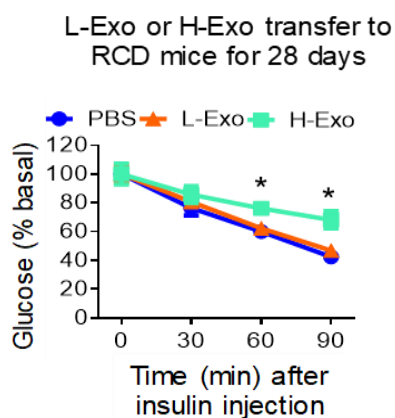

**Supplementary Figure 17: Insulin tolerance test of mice that received adoptive transfer of exosomes for 28 days while being fed the regular chow diet Filled circle – PBS; filled triangle - L-Exo and filled rectangle - H-Exo.**

**Supplementary Table 1. MS/MS analysis of the proteins present on the exosomes derived from RCD (L-Exo) or HFD mice (H-Exo). Data represented as fold change of the signals detected by MS/MS.**

| S. No. | Identified Proteins                                                       | Gene Name (Uniprot) | L-Exo (Signal) n=5 | H-Exo (Signal) n=5 | H-Exo Vs L-Exo |
|--------|---------------------------------------------------------------------------|---------------------|--------------------|--------------------|----------------|
| 1      | Ig alpha chain C region OS                                                |                     | 1E+08              | 7E+07              | 0.49           |
| 2      | Intelectin-1a OS                                                          | Itln1               | 1E+08              | 158430             | 0.00           |
| 3      | Zymogen granule membrane protein 16 OS                                    | Zg16                | 1E+08              | 3E+08              | 2.09           |
| 4      | Annexin A4 OS                                                             | Anxa4               | 7E+07              | 4E+06              | 0.06           |
| 5      | Isoform 2 of Deleted in malignant brain tumors 1 protein OS               | Dmbt1               | 5E+07              | 2E+07              | 0.45           |
| 6      | Pancreatic triacylglycerol lipase OS                                      | Pnlip               | 4E+07              | 22169              | 0.00           |
| 7      | Calcium-activated chloride channel regulator 1 OS                         | Clca1               | 4E+07              | 4E+07              | 1.15           |
| 8      | Aminopeptidase N OS                                                       | Anpep               | 3E+07              | 60512              | 0.00           |
| 9      | Polymeric immunoglobulin receptor OS                                      | Pigr                | 2E+07              | 1E+07              | 0.54           |
| 10     | Colipase OS                                                               | Clps                | 2E+07              | 367920             | 0.02           |
| 11     | Protein LEG1 homolog OS                                                   | Leg1                | 2E+07              | 3E+06              | 0.17           |
| 12     | Cluster of Actin, cytoplasmic 1 OS                                        | Actb                | 1E+07              | 70181              | 0.00           |
| 13     | Isoform 2 of Carcinoembryonic antigen-related cell adhesion molecule 1 OS | Ceacam1             | 1E+07              | 6E+06              | 0.65           |
| 14     | Cadherin-related family member 2 OS                                       | Cdhr2               | 9E+06              | 3E+06              | 0.31           |
| 15     | Pancreatic secretory granule membrane major glycoprotein GP2 OS           | Gp2                 | 6E+06              | 2E+06              | 0.26           |
| 16     | N-acetylated-alpha-linked acidic dipeptidase-like protein OS              | Naaladl1            | 4E+06              | 4E+06              | 1.18           |
| 17     | Mucin-2 (Fragments) OS                                                    | Muc2                | 3E+06              | 7E+06              | 2.56           |
| 18     | Histone H4 OS                                                             | Hist1h4a            | 2E+06              | 0                  | 0.00           |
| 19     | Sodium/potassium-transporting ATPase subunit alpha-2 OS                   | Atp1a2              | 351190             | 0                  | 0.00           |
| 20     | Cluster of Serine protease inhibitor A3K OS                               | Serpina3k           | 9E+06              | 1E+07              | 1.12           |
| 21     | Serum albumin OS                                                          | Alb                 | 1E+07              | 1E+07              | 1.07           |
| 22     | Cluster of Alpha-1-antitrypsin 1-2 OS                                     | Serpina1b           | 5E+06              | 5E+06              | 1.07           |
| 23     | Aspartyl aminopeptidase OS                                                | Dnpep               | 1E+07              | 2E+07              | 1.17           |
| 24     | Serotransferrin OS                                                        | Tf                  | 3E+06              | 3E+06              | 1.00           |

|    |                                                                       |          |        |        |      |
|----|-----------------------------------------------------------------------|----------|--------|--------|------|
| 25 | Chymotrypsin-like elastase family member 3B OS                        | Cela3b   | 0      | 2E+08  |      |
| 26 | CUB and zona pellucida-like domain-containing protein 1 OS            | Cuzd1    | 0      | 1E+07  |      |
| 27 | Ig kappa chain C region OS                                            |          | 4E+07  | 5E+07  | 1.09 |
| 28 | Intestinal-type alkaline phosphatase OS                               | lap      | 789090 | 895010 | 1.13 |
| 29 | Carbonic anhydrase 6 OS                                               | Ca6      | 5E+07  | 5E+07  | 1.02 |
| 30 | Serpin B6 OS                                                          | Serpinb6 | 693210 | 764130 | 1.10 |
| 31 | Mucin-13 OS                                                           | Muc13    | 1E+07  | 1E+07  | 1.43 |
| 32 | Protein S100-A8 OS                                                    | S100a8   | 5E+07  | 5E+07  | 1.02 |
| 33 | Anionic trypsin-2 OS                                                  | Prss2    | 5E+07  | 5E+07  | 1.02 |
| 34 | Neutral ceramidase OS                                                 | Asah2    | 3E+06  | 3E+06  | 1.05 |
| 35 | Annexin A2 OS                                                         | Anxa2    | 2E+06  | 2E+06  | 1.03 |
| 36 | Cluster of Major urinary protein 18 OS                                | Mup18    | 1E+07  | 1E+07  | 1.01 |
| 37 | Pregnancy zone protein OS                                             | Pzp      | 326580 | 346630 | 1.06 |
| 38 | Immunoglobulin J chain OS                                             | Jchain   | 0      | 4E+07  |      |
| 39 | Pancreatic lipase-related protein 2 OS                                | Pnliprp2 | 0      | 1E+06  |      |
| 40 | Ig lambda-1 chain C region OS                                         |          | 0      | 4E+06  |      |
| 41 | Glutamyl aminopeptidase OS                                            | Enpep    | 69150  | 72110  | 1.04 |
| 42 | NAD-specific glutamate dehydrogenase OS                               | gdhB     | 1E+06  | 1E+06  | 1.08 |
| 43 | Calcium-activated chloride channel regulator 4A OS                    | Clca4a   | 150000 | 160060 | 1.07 |
| 44 | Tetraspanin-8 OS                                                      | Tspan8   | 4E+06  | 4E+06  | 1.09 |
| 45 | Cadherin-1 OS                                                         | Cdh1     | 1E+06  | 1E+06  | 1.16 |
| 46 | Isoform 2 of Cadherin-related family member 5 OS                      | Cdhr5    | 965075 | 983080 | 1.02 |
| 47 | Epidermal growth factor receptor kinase substrate 8-like protein 3 OS | Eps8l3   | 669500 | 695050 | 1.04 |
| 48 | Meprin A subunit alpha OS                                             | Mep1a    | 0      | 223710 |      |
| 49 | Antithrombin-III OS                                                   | Serpinc1 | 1E+06  | 1E+06  | 1.18 |
| 50 | Carboxypeptidase A1 OS                                                | Cpa1     | 281790 | 297180 | 1.05 |
| 51 | Choline transporter-like protein 4 OS                                 | Slc44a4  | 132100 | 144410 | 1.09 |
| 52 | Ferritin heavy chain OS                                               | Fth1     | 1E+06  | 1E+06  | 1.07 |
| 53 | Major urinary protein 20 OS                                           | Mup20    | 7E+06  | 7E+06  | 1.03 |
| 54 | Zinc transporter ZIP4 OS                                              | Slc39a4  | 2E+06  | 2E+06  | 1.04 |
| 55 | Chymotrypsinogen B OS                                                 | Ctrb1    | 298160 | 308280 | 1.03 |
| 56 | Trefoil factor 3 OS                                                   | Tff3     | 1E+08  | 2E+08  | 1.08 |
| 57 | Xaa-Pro aminopeptidase 2 OS                                           | Xpnpep2  | 15890  | 16352  | 1.03 |

|    |                                                                     |           |        |        |      |
|----|---------------------------------------------------------------------|-----------|--------|--------|------|
| 58 | Multidrug resistance protein 1A OS                                  | Abcb1a    | 31980  | 39167  | 1.22 |
| 59 | Dipeptidase 1 OS                                                    | Dpep1     | 645100 | 656160 | 1.02 |
| 60 | Isoform 2 of Meprin A subunit beta OS                               | Mep1b     | 402380 | 405190 | 1.01 |
| 61 | Leukocyte elastase inhibitor A OS                                   | Serpinb1a | 348230 | 352720 | 1.01 |
| 62 | Mucosal pentraxin OS                                                | Mptx1     | 1E+07  | 1E+07  | 1.09 |
| 63 | Ectonucleotide pyrophosphatase/phosphodiesterase family member 3 OS | Enpp3     | 89356  | 90939  | 1.02 |
| 64 | Regenerating islet-derived protein 3-beta OS                        | Reg3b     | 562480 | 571450 | 1.02 |
| 65 | Ig kappa chain V-II region 26-10 OS                                 |           | 2E+07  | 2E+07  | 1.01 |
| 66 | Placenta-specific gene 8 protein OS                                 | Plac8     | 3E+07  | 3E+07  | 1.06 |
| 67 | Carboxypeptidase A2 OS                                              | Cpa2      | 312540 | 325450 | 1.04 |
| 68 | Prosaposin OS                                                       | Psap      | 312150 | 321730 | 1.03 |
| 69 | Galectin-4 OS                                                       | Lgals4    | 911210 | 921140 | 1.01 |
| 70 | Hemopexin OS                                                        | Hpx       | 153780 | 173500 | 1.13 |
| 71 | Galectin-3-binding protein OS                                       | Lgals3bp  | 63620  | 66274  | 1.04 |
| 72 | Phospholipid scramblase 1 OS                                        | Plscr1    | 632580 | 652940 | 1.03 |
| 73 | Cluster of Ig kappa chain V-III region PC 2880/PC 1229 OS           |           | 3E+06  | 3E+06  | 1.03 |
| 74 | Isoform 2 of Ig mu chain C region OS                                | Ighm      | 611700 | 637010 | 1.04 |
| 75 | Hemoglobin subunit alpha OS                                         | Hba       | 1E+07  | 2E+07  | 1.28 |
| 76 | Murinoglobulin-1 OS                                                 | Mug1      | 282990 | 302110 | 1.07 |
| 77 | Uromodulin OS                                                       | Umod      | 201000 | 205200 | 1.02 |
| 78 | Hemoglobin subunit beta-1 OS                                        | Hbb-b1    | 2E+06  | 2E+06  | 1.00 |
| 79 | Ezrin OS                                                            | Ezr       | 47425  | 46437  | 0.98 |
| 80 | Dipeptidyl peptidase 4 OS                                           | Dpp4      | 23709  | 22600  | 0.95 |
| 81 | Cluster of Ig heavy chain V region MOPC 21 (Fragment) OS            |           | 1E+06  | 2E+06  | 1.24 |
| 82 | Regenerating islet-derived protein 3-gamma OS                       | Reg3g     | 2E+06  | 2E+06  | 1.08 |
| 83 | Apolipoprotein A-I OS                                               | Apoa1     | 1E+06  | 1E+06  | 1.08 |
| 84 | Phospholipase B-like 1 OS                                           | Plbd1     | 19811  | 18118  | 0.91 |
| 85 | Annexin A1 OS                                                       | Anxa1     | 94973  | 97943  | 1.03 |
| 87 | Ig kappa chain V-V region HP R16.7 OS                               |           | 1E+07  | 9E+06  | 0.97 |
| 88 | Sodium/potassium-transporting ATPase subunit beta-1 OS              | Atp1b1    | 1E+06  | 1E+06  | 0.84 |
| 89 | Ferritin light chain 1 OS                                           | Ftl1      | 3E+06  | 3E+06  | 0.97 |
| 90 | Carbonic anhydrase 4 OS                                             | Ca4       | 1E+06  | 1E+06  | 1.01 |
| 91 | Retinoic acid-induced protein 3 OS                                  | Gprc5a    | 743200 | 758390 | 1.02 |

|     |                                                       |         |        |        |      |
|-----|-------------------------------------------------------|---------|--------|--------|------|
| 92  | Isoform 2 of Phospholipase B1, membrane-associated OS | Plb1    | 70358  | 71545  | 1.02 |
| 93  | Polyubiquitin-B OS                                    | Ubb     | 3E+06  | 4E+06  | 1.24 |
| 94  | Angiotensin-converting enzyme OS                      | Ace     | 43286  | 44489  | 1.03 |
| 96  | Acidic mammalian chitinase OS                         | Chia    | 239990 | 239990 | 1.00 |
| 98  | Alpha-2-HS-glycoprotein OS                            | Ahsg    | 139560 | 148240 | 1.06 |
| 99  | Protein S100-A9 OS                                    | S100a9  | 5E+06  | 6E+06  | 1.02 |
| 103 | Vitamin D-binding protein OS                          | Gc      | 12155  | 19335  | 1.59 |
| 105 | PDZ domain-containing protein GIPC2 OS                | Gipc2   | 78365  | 80563  | 1.03 |
| 106 | Trefoil factor 2 OS                                   | Tff2    | 961700 | 971600 | 1.01 |
| 108 | Ig lambda-2 chain C region OS                         | Iglc2   | 761820 | 798130 | 1.05 |
| 109 | Serum amyloid P-component OS                          | Apcs    | 1E+06  | 1E+06  | 1.01 |
| 110 | Protein AMBP OS                                       | Ambp    | 329330 | 309280 | 0.94 |
| 111 | Solute carrier family 15 member 1 OS                  | Slc15a1 | 179840 | 183350 | 1.02 |
| 113 | Apolipoprotein A-II OS                                | Apoa2   | 769510 | 759620 | 0.99 |
| 114 | Complement C3 OS                                      | C3      | 1522.8 | 1325.8 | 0.87 |
| 115 | Syncollin OS                                          | Sycn    | 603400 | 622500 | 1.03 |

**Supplementary Table 2. Fold change of miRNAs in L-Exo vs H-Exo (n=5/group) quantified by miRNA array (Qiagen).**

| Mature ID       | L-Exo vs H-Exo | Mature ID       | L-Exo vs H-Exo | Mature ID       | L-Exo vs H-Exo |
|-----------------|----------------|-----------------|----------------|-----------------|----------------|
| mmu-miR-193a-3p | 139.75         | mmu-miR-466g    | 11.46          | mmu-miR-99a-5p  | -79.79         |
| mmu-miR-449a-5p | 83.79          | mmu-miR-9-5p    | 11.44          | mmu-miR-455-3p  | -21.76         |
| mmu-miR-96-5p   | 42.95          | mmu-miR-654-5p  | 11.43          | mmu-miR-186-3p  | -7.97          |
| mmu-miR-375-3p  | 37.27          | mmu-miR-547-3p  | 11.37          | mmu-miR-1187    | -7.91          |
| mmu-miR-193a-3p | 35.65          | mmu-let-7g-3p   | 11.37          | mmu-miR-17-3p   | -7.78          |
| mmu-miR-290a-3p | 35.06          | mmu-miR-383-5p  | 11.35          | mmu-miR-130b-5p | -6.09          |
| mmu-miR-582-3p  | 30.60          | mmu-miR-101a-5p | 10.73          | mmu-miR-296-5p  | -5.28          |
| mmu-miR-500-3p  | 27.11          | mmu-miR-470-5p  | 10.73          | mmu-miR-1897-5p | -4.72          |
| mmu-miR-882     | 24.13          | mmu-miR-743a-3p | 10.56          | mmu-miR-1892    | -4.53          |
| mmu-miR-324-3p  | 24.03          | mmu-miR-875-5p  | 10.09          | mmu-miR-1194    | -4.45          |
| mmu-miR-487b-3p | 22.46          | mmu-miR-541-5p  | 10.08          | mmu-let-7c-5p   | -4.40          |
| mmu-miR-874-3p  | 21.96          | mmu-miR-133a-3p | 9.90           | mmu-miR-719     | -4.17          |
| mmu-miR-221-3p  | 21.06          | mmu-miR-496a-3p | 9.75           | mmu-miR-467c-5p | -4.16          |
| mmu-miR-671-3p  | 20.54          | mmu-miR-290a-5p | 9.71           | mmu-miR-720     | -3.95          |
| mmu-let-7i-3p   | 19.43          | mmu-miR-181c-5p | 9.67           | mmu-miR-883a-3p | -3.78          |
| mmu-miR-10b-3p  | 18.50          | mmu-miR-155-5p  | 9.54           | mmu-miR-698-3p  | -3.75          |
| mmu-miR-411-5p  | 17.92          | mmu-miR-302c-5p | 9.42           | mmu-miR-181a-5p | -3.60          |
| mmu-miR-300-3p  | 17.20          | mmu-miR-702-3p  | 9.27           | mmu-let-7b-5p   | -3.59          |
| mmu-miR-294-5p  | 14.85          | mmu-miR-142a-3p | 9.11           | mmu-let-7e-5p   | -3.47          |
| mmu-miR-743b-5p | 14.51          | mmu-miR-100-5p  | 8.74           | mmu-miR-1897-3p | -3.43          |
| mmu-miR-409-3p  | 13.47          | mmu-miR-509-5p  | 8.62           | mmu-miR-361-5p  | -3.33          |
| mmu-miR-15a-5p  | 13.24          | mmu-miR-761     | 8.57           | mmu-miR-466c-5p | -3.06          |
| mmu-miR-345-3p  | 12.71          | mmu-miR-210-3p  | 8.33           | mmu-miR-146b-3p | -2.99          |
| mmu-miR-1195    | 12.63          | mmu-miR-665-3p  | 8.12           | mmu-miR-196a-5p | -2.84          |
| mmu-miR-489-3p  | 12.18          | mmu-miR-343     | 8.09           | mmu-miR-1895    | -2.75          |
| mmu-miR-18a-5p  | 12.02          | mmu-miR-762     | 8.00           | mmu-let-7d-5p   | -2.74          |
| mmu-miR-712-5p  | 11.94          | mmu-miR-802-5p  | 7.77           | mmu-miR-138-5p  | -2.72          |
| mmu-miR-34b-3p  | 11.90          | mmu-miR-216a-5p | 7.40           | mmu-miR-23a-3p  | -2.71          |
| mmu-miR-127-5p  | 11.70          | mmu-miR-19b-3p  | 7.40           | mmu-miR-146b-5p | -2.70          |
| mmu-miR-19a-3p  | 11.57          | mmu-miR-92a-3p  | 7.23           |                 |                |

**Supplementary Table 3. Lipids detected by triple quadrupole MS in CD63<sup>+</sup>A33<sup>+</sup> exosomes derived from mouse and human feces.**

| Mass         | Compound Formula | Compound Name | Collected from mice at 6 Months after fed either RCD or HFD (nmols) |                 | Collected from mice at 12 Months after fed either RCD or HFD (nmols) |                  | Human (nmols)     |               |
|--------------|------------------|---------------|---------------------------------------------------------------------|-----------------|----------------------------------------------------------------------|------------------|-------------------|---------------|
|              |                  |               | L-Exo 6M (n=10)                                                     | H-Exo 6M (n=10) | L-Exo 12M (n=10)                                                     | H-Exo 12M (n=10) | Healthy-Exo (n=5) | T2D-Exo (n=7) |
| 494.30       | C24H48O7PN       | LPC(16:1)     | 0.01                                                                | 0.00            | 0.01                                                                 | 0.62             | 0.03              | 0.00          |
| 496.30       | C24H50O7PN       | LPC(16:0)     | 0.05                                                                | 0.56            | 0.54                                                                 | 56.02            | 7.36              | 0.08          |
| 518.30       | C26H48O7PN       | LPC(18:3)     | 0.01                                                                | 0.13            | 0.00                                                                 | 10.66            | 0.12              | 0.03          |
| 520.30       | C26H50O7PN       | LPC(18:2)     | 0.05                                                                | 0.47            | 0.00                                                                 | 106.07           | 2.37              | 0.10          |
| 522.30       | C26H52O7PN       | LPC(18:1)     | 0.01                                                                | 0.27            | 0.01                                                                 | 26.23            | 0.65              | 0.05          |
| 524.40       | C26H54O7PN       | LPC(18:0)     | 0.06                                                                | 1.60            | 0.20                                                                 | 13.68            | 0.89              | 0.06          |
| 542.30       | C28H48O7PN       | LPC(20:5)     | 0.01                                                                | 0.00            | 0.01                                                                 | 0.00             | 0.02              | 0.00          |
| 544.30       | C28H50O7PN       | LPC(20:4)     | 0.00                                                                | 0.03            | 0.01                                                                 | 0.00             | 0.00              | 0.02          |
| 546.30       | C28H52O7PN       | LPC(20:3)     | 0.00                                                                | 0.00            | 0.00                                                                 | 0.00             | 0.00              | 0.00          |
| 548.40       | C28H54O7PN       | LPC(20:2)     | 0.00                                                                | 0.00            | 0.00                                                                 | 0.33             | 0.00              | 0.00          |
| 550.40       | C28H56O7PN       | LPC(20:1)     | 0.00                                                                | 0.08            | 0.00                                                                 | 2.30             | 0.08              | 0.00          |
| 552.40       | C28H58O7PN       | LPC(20:0)     | 0.01                                                                | 0.08            | 0.03                                                                 | 3.21             | 0.09              | 0.03          |
| 568.30       | C30H50O7PN       | LPC(22:6)     | 0.01                                                                | 0.00            | 0.00                                                                 | 1.86             | 0.07              | 0.03          |
| 570.30       | C30H52O7PN       | LPC(22:5)     | 0.00                                                                | 0.00            | 0.01                                                                 | 0.84             | 0.00              | 0.03          |
| Total LysoPC |                  | Total LysoPC  | 0.22                                                                | 3.20            | 0.81                                                                 | 221.82           | 0.67              | 0.65          |
| 676.50       | C36H70O8PN       | PC(28:1)      | 0.00                                                                | 0.00            | 0.00                                                                 | 0.26             | 0.09              | 0.00          |
| 704.50       | C38H74O8PN       | PC(30:1)      | 0.00                                                                | 0.02            | 0.09                                                                 | 0.32             | 0.02              | 0.00          |
| 706.50       | C38H76O8PN       | PC(30:0)      | 0.04                                                                | 0.16            | 0.15                                                                 | 1.01             | 0.34              | 0.01          |
| 730.50       | C40H76O8PN       | PC(32:2)      | 0.01                                                                | 0.08            | 0.00                                                                 | 0.22             | 0.00              | 0.90          |
| 732.50       | C40H78O8PN       | PC(32:1)      | 0.03                                                                | 0.16            | 0.10                                                                 | 0.65             | 0.10              | 0.03          |
| 734.60       | C40H80O8PN       | PC(32:0)      | 0.09                                                                | 1.34            | 0.32                                                                 | 1.72             | 0.40              | 0.42          |
| 754.50       | C42H76O8PN       | PC(34:4)      | 0.00                                                                | 0.00            | 0.00                                                                 | 0.03             | 0.00              | 0.41          |
| 756.50       | C42H78O8PN       | PC(34:3)      | 0.00                                                                | 0.14            | 0.00                                                                 | 1.14             | 0.06              | 0.50          |
| 758.60       | C42H80O8PN       | PC(34:2)      | 0.11                                                                | 1.92            | 0.00                                                                 | 21.90            | 0.73              | 7.17          |
| 760.60       | C42H82O8PN       | PC(34:1)      | 0.12                                                                | 2.26            | 0.10                                                                 | 6.39             | 1.28              | 2.17          |
| 762.60       | C42H84O8PN       | PC(34:0)      | 0.04                                                                | 0.53            | 0.10                                                                 | 0.64             | 0.15              | 0.01          |
| 778.50       | C44H76O8PN       | PC(36:6)      | 0.01                                                                | 0.12            | 0.00                                                                 | 0.00             | 0.00              | 0.01          |
| 780.50       | C44H78O8PN       | PC(36:5)      | 0.02                                                                | 0.10            | 0.00                                                                 | 5.44             | 0.13              | 0.01          |
| 782.60       | C44H80O8PN       | PC(36:4)      | 0.06                                                                | 1.60            | 0.00                                                                 | 32.76            | 0.15              | 0.05          |
| 784.60       | C44H82O8PN       | PC(36:3)      | 0.04                                                                | 0.64            | 0.00                                                                 | 12.92            | 0.41              | 0.08          |
| 786.60       | C44H84O8PN       | PC(36:2)      | 0.04                                                                | 0.85            | 0.00                                                                 | 7.75             | 0.35              | 0.11          |

|          |             |           |      |       |      |        |      |       |
|----------|-------------|-----------|------|-------|------|--------|------|-------|
| 788.60   | C44H86O8PN  | PC(36:1)  | 0.04 | 0.76  | 0.00 | 2.04   | 0.26 | 0.05  |
| 790.60   | C44H88O8PN  | PC(36:0)  | 0.03 | 0.40  | 0.00 | 0.52   | 0.15 | 0.01  |
| 806.60   | C46H80O8PN  | PC(38:6)  | 0.02 | 0.39  | 0.02 | 0.38   | 0.07 | 0.01  |
| 808.60   | C46H82O8PN  | PC(38:5)  | 0.01 | 0.21  | 0.00 | 0.26   | 0.05 | 0.02  |
| 810.60   | C46H84O8PN  | PC(38:4)  | 0.02 | 0.74  | 0.00 | 0.60   | 0.00 | 0.01  |
| 812.60   | C46H86O8PN  | PC(38:3)  | 0.02 | 0.29  | 0.00 | 0.80   | 0.07 | 0.02  |
| 814.60   | C46H88O8PN  | PC(38:2)  | 0.01 | 0.13  | 0.00 | 0.83   | 0.07 | 0.00  |
| 816.60   | C46H90O8PN  | PC(38:1)  | 0.01 | 0.25  | 0.00 | 0.47   | 0.03 | 0.00  |
| 818.70   | C46H92O8PN  | PC(38:0)  | 0.01 | 0.96  | 0.01 | 0.32   | 0.00 | 0.00  |
| 830.60   | C48H80O8PN  | PC(40:8)  | 0.00 | 0.00  | 0.00 | 0.29   | 0.05 | 0.00  |
| 832.60   | C48H82O8PN  | PC(40:7)  | 0.03 | 0.14  | 0.06 | 0.26   | 0.15 | 0.00  |
| 834.60   | C48H84O8PN  | PC(40:6)  | 0.00 | 0.13  | 0.01 | 0.21   | 0.11 | 0.00  |
| 836.60   | C48H86O8PN  | PC(40:5)  | 0.00 | 0.11  | 0.00 | 0.08   | 0.00 | 0.00  |
| 838.60   | C48H88O8PN  | PC(40:4)  | 0.00 | 0.00  | 0.00 | 0.06   | 0.00 | 0.00  |
| 840.60   | C48H90O8PN  | PC(40:3)  | 0.00 | 0.00  | 0.00 | 0.21   | 0.00 | 0.00  |
| 842.70   | C48H92O8PN  | PC(40:2)  | 0.01 | 0.00  | 0.00 | 0.23   | 0.00 | 0.00  |
| 852.50   | C50H78O8PN  | PC(42:11) | 0.00 | 0.00  | 0.00 | 0.06   | 0.00 | 0.00  |
| 854.60   | C50H80O8PN  | PC(42:10) | 0.00 | 0.00  | 0.00 | 0.10   | 0.00 | 0.00  |
| 856.60   | C50H82O8PN  | PC(42:9)  | 0.00 | 0.00  | 0.00 | 0.01   | 0.00 | 0.00  |
| 858.60   | C50H84O8PN  | PC(42:8)  | 0.00 | 0.00  | 0.00 | 0.00   | 0.00 | 0.00  |
| 860.60   | C50H86O8PN  | PC(42:7)  | 0.00 | 0.00  | 0.00 | 0.04   | 0.00 | 0.00  |
| 862.60   | C50H88O8PN  | PC(42:6)  | 0.00 | 0.00  | 0.00 | 0.14   | 0.00 | 0.00  |
| 864.60   | C50H90O8PN  | PC(42:5)  | 0.00 | 0.00  | 0.00 | 0.02   | 0.00 | 0.00  |
| 866.70   | C50H92O8PN  | PC(42:4)  | 0.00 | 0.00  | 0.00 | 0.00   | 0.00 | 0.00  |
| 868.70   | C50H94O8PN  | PC(42:3)  | 0.00 | 0.12  | 0.00 | 0.00   | 0.03 | 0.01  |
| 870.70   | C50H96O8PN  | PC(42:2)  | 0.00 | 0.00  | 0.00 | 0.04   | 0.00 | 0.00  |
| 878.60   | C52H80O8PN  | PC(44:12) | 0.00 | 0.00  | 0.00 | 0.32   | 0.00 | 0.00  |
| 880.60   | C52H82O8PN  | PC(44:11) | 0.00 | 0.00  | 0.00 | 0.04   | 0.00 | 0.00  |
| 882.60   | C52H84O8PN  | PC(44:10) | 0.00 | 0.00  | 0.00 | 0.00   | 0.00 | 0.00  |
| 884.60   | C52H86O8PN  | PC(44:9)  | 0.00 | 0.00  | 0.00 | 0.00   | 0.00 | 0.00  |
| 886.60   | C52H88O8PN  | PC(44:8)  | 0.00 | 0.00  | 0.00 | 0.00   | 0.00 | 0.00  |
| 888.60   | C52H90O8PN  | PC(44:7)  | 0.00 | 0.00  | 0.00 | 0.00   | 0.00 | 0.00  |
| 890.70   | C52H92O8PN  | PC(44:6)  | 0.00 | 0.00  | 0.00 | 0.00   | 0.00 | 0.00  |
| 892.70   | C52H94O8PN  | PC(44:5)  | 0.00 | 0.00  | 0.01 | 0.00   | 0.00 | 0.00  |
| 894.70   | C52H96O8PN  | PC(44:4)  | 0.00 | 0.00  | 0.00 | 0.00   | 0.00 | 0.00  |
| 896.70   | C52H98O8PN  | PC(44:3)  | 0.00 | 0.00  | 0.00 | 0.00   | 0.00 | 0.00  |
| 898.70   | C52H100O8PN | PC(44:2)  | 0.00 | 0.00  | 0.00 | 0.00   | 0.00 | 0.00  |
| Total PC |             | Total PC  | 0.83 | 14.55 | 0.97 | 101.49 | 0.30 | 10.22 |
| 701.50   | C39H77N2O6P | SM(16:1)  | 0.00 | 0.00  | 0.04 | 0.20   | 0.00 | 0.00  |



|                     |             |                     |      |       |      |       |       |      |
|---------------------|-------------|---------------------|------|-------|------|-------|-------|------|
| 703.60              | C39H79N2O6P | SM(16:0)            | 1.17 | 8.87  | 4.14 | 9.48  | 8.38  | 0.34 |
| 705.60              | C39H81N2O6P | DSM(16:0)           | 0.39 | 3.08  | 1.22 | 1.55  | 4.51  | 0.25 |
| 729.60              | C41H81N2O6P | SM(18:1)            | 0.00 | 0.00  | 0.00 | 0.13  | 0.00  | 0.00 |
| 731.60              | C41H83N2O6P | SM(18:0)            | 0.03 | 0.44  | 0.08 | 0.55  | 0.62  | 0.06 |
| 733.60              | C41H85N2O6P | DSM(18:0)           | 0.02 | 0.25  | 0.07 | 0.41  | 0.39  | 0.00 |
| 785.60              | C45H89N2O6P | SM(22:1)            | 0.05 | 0.35  | 0.00 | 3.84  | 0.00  | 0.00 |
| 787.70              | C45H91N2O6P | SM(22:0)            | 0.09 | 0.84  | 0.15 | 5.02  | 1.45  | 0.02 |
| 789.70              | C45H93N2O6P | DSM(22:0)           | 0.03 | 0.20  | 0.11 | 1.02  | 0.98  | 0.02 |
| 813.70              | C47H93N2O6P | SM(24:1)            | 0.14 | 0.28  | 0.45 | 2.42  | 0.57  | 0.04 |
| 815.70              | C47H95N2O6P | SM(24:0)            | 0.11 | 0.42  | 0.35 | 2.74  | 1.63  | 0.09 |
| 817.70              | C47H97N2O6P | DSM(24:0)           | 0.04 | 0.40  | 0.18 | 0.00  | 1.22  | 0.07 |
| Total SM<br>and DSM |             | Total SM<br>and DSM | 2.07 | 15.14 | 6.79 | 27.34 | 19.73 | 0.90 |
| 714.50              | C40H76O7PN  | ePC(32:3)           | 0.00 | 0.00  | 0.00 | 0.00  | 0.00  | 0.00 |
| 716.60              | C40H78O7PN  | ePC(32:2)           | 0.01 | 0.00  | 0.01 | 0.04  | 0.00  | 0.00 |
| 718.60              | C40H80O7PN  | ePC(32:1)           | 0.05 | 0.27  | 0.17 | 0.27  | 0.09  | 0.00 |
| 720.60              | C40H82O7PN  | ePC(32:0)           | 0.05 | 0.32  | 0.19 | 0.50  | 0.26  | 0.01 |
| 740.60              | C42H78O7PN  | ePC(34:4)           | 0.00 | 0.00  | 0.00 | 0.06  | 0.00  | 0.00 |
| 742.60              | C42H80O7PN  | ePC(34:3)           | 0.04 | 0.05  | 0.15 | 0.17  | 0.00  | 0.00 |
| 744.60              | C42H82O7PN  | ePC(34:2)           | 0.05 | 0.72  | 0.14 | 0.38  | 0.10  | 0.02 |
| 746.60              | C42H84O7PN  | ePC(34:1)           | 0.05 | 0.60  | 0.13 | 0.56  | 0.16  | 0.02 |
| 748.60              | C42H86O7PN  | ePC(34:0)           | 0.02 | 0.20  | 0.06 | 0.27  | 0.11  | 0.01 |
| 766.60              | C44H80O7PN  | ePC(36:5)           | 0.02 | 0.63  | 0.10 | 0.28  | 0.00  | 0.00 |
| 768.60              | C44H82O7PN  | ePC(36:4)           | 0.02 | 0.51  | 0.04 | 0.16  | 0.77  | 0.03 |
| 770.60              | C44H84O7PN  | ePC(36:3)           | 0.01 | 0.25  | 0.00 | 0.22  | 0.03  | 0.01 |
| 772.60              | C44H86O7PN  | ePC(36:2)           | 0.01 | 0.16  | 0.00 | 0.57  | 0.05  | 0.03 |
| 774.60              | C44H88O7PN  | ePC(36:1)           | 0.02 | 0.15  | 0.00 | 1.00  | 0.16  | 0.03 |
| 776.60              | C44H90O7PN  | ePC(36:0)           | 0.01 | 0.14  | 0.02 | 0.18  | 0.09  | 0.01 |
| 792.60              | C46H82O7PN  | ePC(38:6)           | 0.04 | 4.51  | 0.08 | 0.33  | 0.00  | 0.01 |
| 794.60              | C46H84O7PN  | ePC(38:5)           | 0.02 | 0.36  | 0.00 | 0.11  | 0.00  | 0.01 |
| 796.60              | C46H86O7PN  | ePC(38:4)           | 0.00 | 0.25  | 0.00 | 0.47  | 0.03  | 0.01 |
| 798.60              | C46H88O7PN  | ePC(38:3)           | 0.01 | 0.00  | 0.00 | 0.96  | 0.06  | 0.00 |
| 800.60              | C46H90O7PN  | ePC(38:2)           | 0.00 | 0.07  | 0.00 | 0.54  | 0.03  | 0.01 |
| 802.70              | C46H92O7PN  | ePC(38:1)           | 0.01 | 0.14  | 0.00 | 0.55  | 0.23  | 0.00 |
| 804.70              | C46H94O7PN  | ePC(38:0)           | 0.02 | 0.12  | 0.02 | 0.16  | 0.10  | 0.00 |
| 820.60              | C48H86O7PN  | ePC(40:6)           | 0.01 | 0.49  | 0.00 | 0.03  | 0.03  | 0.00 |
| 822.60              | C48H88O7PN  | ePC(40:5)           | 0.01 | 0.05  | 0.01 | 0.07  | 0.00  | 0.00 |
| 824.60              | C48H90O7PN  | ePC(40:4)           | 0.03 | 0.00  | 0.12 | 0.03  | 0.00  | 0.00 |
| 826.70              | C48H92O7PN  | ePC(40:3)           | 0.00 | 0.00  | 0.00 | 0.12  | 0.00  | 0.00 |
| 828.70              | C48H94O7PN  | ePC(40:2)           | 0.00 | 0.00  | 0.00 | 0.21  | 0.00  | 0.00 |

|              |            |              |       |      |        |      |      |       |
|--------------|------------|--------------|-------|------|--------|------|------|-------|
| Total ePC    |            | Total ePC    | 0.51  | 9.98 | 1.23   | 8.26 | 1.43 | 1.32  |
| 452.30       | C21H42O7PN | LPE(16:1)    | 0.00  | 0.00 | 0.36   | 0.17 | 0.63 | 0.00  |
| 454.30       | C21H44O7PN | LPE(16:0)    | 0.22  | 0.92 | 1.29   | 0.10 | 1.64 | 0.22  |
| 476.30       | C23H42O7PN | LPE(18:3)    | 0.06  | 0.00 | 0.16   | 0.08 | 0.82 | 0.00  |
| 478.30       | C23H44O7PN | LPE(18:2)    | 0.00  | 0.17 | 0.26   | 0.04 | 0.20 | 0.85  |
| 480.30       | C23H46O7PN | LPE(18:1)    | 0.06  | 0.08 | 0.31   | 0.09 | 0.26 | 0.18  |
| 500.30       | C25H42O7PN | LPE(20:5)    | 0.02  | 0.00 | 0.00   | 0.00 | 0.00 | 0.24  |
| 502.30       | C25H44O7PN | LPE(20:4)    | 0.00  | 0.00 | 0.08   | 0.58 | 0.00 | 0.05  |
| 504.30       | C25H46O7PN | LPE(20:3)    | 0.01  | 0.00 | 0.25   | 0.00 | 0.00 | 0.06  |
| 506.30       | C25H48O7PN | LPE(20:2)    | 0.00  | 0.01 | 0.02   | 0.14 | 0.52 | 0.00  |
| 508.30       | C25H50O7PN | LPE(20:1)    | 0.00  | 0.15 | 0.04   | 0.02 | 0.00 | 0.00  |
| 510.30       | C25H52O7PN | LPE(20:0)    | 0.08  | 0.51 | 0.39   | 0.15 | 0.00 | 0.98  |
| 526.30       | C27H44O7PN | LPE(22:6)    | 0.02  | 0.15 | 0.08   | 0.03 | 0.38 | 0.00  |
| 528.30       | C27H46O7PN | LPE(22:5)    | 0.01  | 0.34 | 0.04   | 0.00 | 0.00 | 0.00  |
| Total LysoPE |            | Total LysoPE | 0.48  | 2.33 | 3.25   | 1.41 | 4.44 | 2.58  |
| 634.40       | C33H64O8PN | PE(28:1)     | 0.00  | 0.00 | 0.00   | 0.00 | 0.18 | 0.00  |
| 636.50       | C33H66O8PN | PE(28:0)     | 2.58  | 0.16 | 7.21   | 0.23 | 0.00 | 0.98  |
| 662.50       | C35H68O8PN | PE(30:1)     | 0.13  | 0.00 | 0.48   | 0.01 | 0.00 | 0.26  |
| 664.50       | C35H70O8PN | PE(30:0)     | 33.80 | 5.32 | 106.39 | 2.60 | 4.66 | 17.27 |
| 688.50       | C37H70O8PN | PE(32:2)     | 1.23  | 0.00 | 4.18   | 0.11 | 0.00 | 1.66  |
| 690.50       | C37H72O8PN | PE(32:1)     | 0.85  | 0.17 | 2.73   | 0.17 | 0.41 | 2.69  |
| 692.50       | C37H74O8PN | PE(32:0)     | 2.14  | 0.51 | 6.56   | 0.32 | 0.47 | 1.10  |
| 712.50       | C39H70O8PN | PE(34:4)     | 0.16  | 0.07 | 0.34   | 0.00 | 0.09 | 0.18  |
| 714.50       | C39H72O8PN | PE(34:3)     | 0.58  | 0.00 | 0.53   | 0.00 | 0.74 | 0.84  |
| 716.50       | C39H74O8PN | PE(34:2)     | 5.78  | 0.92 | 18.44  | 0.00 | 1.93 | 10.53 |
| 718.50       | C39H76O8PN | PE(34:1)     | 2.74  | 0.84 | 8.76   | 0.55 | 1.10 | 7.09  |
| 720.50       | C39H78O8PN | PE(34:0)     | 0.00  | 0.07 | 0.40   | 0.06 | 0.07 | 0.00  |
| 736.50       | C41H70O8PN | PE(36:6)     | 0.04  | 0.01 | 0.04   | 0.00 | 0.00 | 0.08  |
| 738.50       | C41H72O8PN | PE(36:5)     | 0.40  | 0.08 | 0.52   | 0.00 | 0.00 | 0.52  |
| 740.50       | C41H74O8PN | PE(36:4)     | 0.57  | 0.14 | 1.15   | 0.00 | 0.14 | 0.65  |
| 742.50       | C41H76O8PN | PE(36:3)     | 0.30  | 0.00 | 0.58   | 0.00 | 0.35 | 0.47  |
| 744.50       | C41H78O8PN | PE(36:2)     | 0.30  | 0.13 | 1.05   | 0.40 | 0.34 | 0.40  |
| 746.60       | C41H80O8PN | PE(36:1)     | 0.19  | 0.07 | 0.58   | 0.43 | 0.62 | 0.11  |
| 748.60       | C41H82O8PN | PE(36:0)     | 0.02  | 0.06 | 0.09   | 0.00 | 0.21 | 0.06  |
| 764.50       | C43H74O8PN | PE(38:6)     | 0.16  | 0.00 | 0.58   | 0.00 | 0.00 | 0.04  |
| 766.50       | C43H76O8PN | PE(38:5)     | 0.13  | 0.02 | 0.45   | 0.04 | 0.00 | 0.04  |
| 768.50       | C43H78O8PN | PE(38:4)     | 0.00  | 0.08 | 0.24   | 0.10 | 0.00 | 0.10  |
| 770.60       | C43H80O8PN | PE(38:3)     | 0.06  | 0.00 | 0.05   | 0.01 | 0.00 | 0.02  |
| 772.60       | C43H82O8PN | PE(38:2)     | 0.04  | 0.00 | 0.00   | 0.02 | 0.00 | 0.00  |

|              |             |              |       |      |        |      |       |       |
|--------------|-------------|--------------|-------|------|--------|------|-------|-------|
| 774.60       | C43H84O8PN  | PE(38:1)     | 0.01  | 0.00 | 0.00   | 0.01 | 0.09  | 0.00  |
| 776.60       | C43H86O8PN  | PE(38:0)     | 0.00  | 0.00 | 0.00   | 0.00 | 0.00  | 0.00  |
| 788.50       | C45H74O8PN  | PE(40:8)     | 0.00  | 0.00 | 0.00   | 0.00 | 0.05  | 0.00  |
| 790.50       | C45H76O8PN  | PE(40:7)     | 0.00  | 0.07 | 0.00   | 0.00 | 0.00  | 0.00  |
| 792.50       | C45H78O8PN  | PE(40:6)     | 0.00  | 0.00 | 0.00   | 0.01 | 0.00  | 0.00  |
| 794.60       | C45H80O8PN  | PE(40:5)     | 0.00  | 0.00 | 0.00   | 0.00 | 0.19  | 0.00  |
| 796.60       | C45H82O8PN  | PE(40:4)     | 0.00  | 0.05 | 0.00   | 0.00 | 0.09  | 0.00  |
| 798.60       | C45H84O8PN  | PE(40:3)     | 0.00  | 0.01 | 0.00   | 0.00 | 0.00  | 0.00  |
| 800.60       | C45H86O8PN  | PE(40:2)     | 0.00  | 0.00 | 0.00   | 0.00 | 0.00  | 0.00  |
| 812.50       | C47H74O8PN  | PE(42:10)    | 0.00  | 0.00 | 0.00   | 0.02 | 0.00  | 0.00  |
| 814.50       | C47H76O8PN  | PE(42:9)     | 0.00  | 0.07 | 0.00   | 0.00 | 0.00  | 0.00  |
| 816.50       | C47H78O8PN  | PE(42:8)     | 0.00  | 0.00 | 0.00   | 0.01 | 0.00  | 0.00  |
| 818.60       | C47H80O8PN  | PE(42:7)     | 0.00  | 0.13 | 0.00   | 0.00 | 0.00  | 0.00  |
| 820.60       | C47H82O8PN  | PE(42:6)     | 0.00  | 0.00 | 0.00   | 0.00 | 0.08  | 0.00  |
| 822.60       | C47H84O8PN  | PE(42:5)     | 0.00  | 0.00 | 0.00   | 0.00 | 0.00  | 0.00  |
| 824.60       | C47H86O8PN  | PE(42:4)     | 0.00  | 0.00 | 0.00   | 0.00 | 0.00  | 0.00  |
| 826.60       | C47H88O8PN  | PE(42:3)     | 0.00  | 0.00 | 0.00   | 0.00 | 0.00  | 0.00  |
| 828.60       | C47H90O8PN  | PE(42:2)     | 0.00  | 0.00 | 0.00   | 0.00 | 0.15  | 0.00  |
| 836.50       | C49H74O8PN  | PE(44:12)    | 0.00  | 0.00 | 0.00   | 0.00 | 0.00  | 0.00  |
| 838.50       | C49H76O8PN  | PE(44:11)    | 0.00  | 0.00 | 0.00   | 0.00 | 0.00  | 0.00  |
| 840.50       | C49H78O8PN  | PE(44:10)    | 0.00  | 0.00 | 0.00   | 0.00 | 0.00  | 0.00  |
| 842.60       | C49H80O8PN  | PE(44:9)     | 0.00  | 0.00 | 0.00   | 0.00 | 0.00  | 0.00  |
| 844.60       | C49H82O8PN  | PE(44:8)     | 0.00  | 0.06 | 0.00   | 0.00 | 0.00  | 0.00  |
| 846.60       | C49H84O8PN  | PE(44:7)     | 0.00  | 0.00 | 0.00   | 0.00 | 0.00  | 0.01  |
| 848.60       | C49H86O8PN  | PE(44:6)     | 0.00  | 0.02 | 0.00   | 0.00 | 0.00  | 0.00  |
| 850.60       | C49H88O8PN  | PE(44:5)     | 0.00  | 0.05 | 0.00   | 0.06 | 0.00  | 0.00  |
| 852.60       | C49H90O8PN  | PE(44:4)     | 0.00  | 0.00 | 0.00   | 0.00 | 0.00  | 0.00  |
| 854.70       | C49H92O8PN  | PE(44:3)     | 0.00  | 0.00 | 0.00   | 0.01 | 0.00  | 0.00  |
| 856.70       | C49H94O8PN  | PE(44:2)     | 0.00  | 0.00 | 0.00   | 0.00 | 0.00  | 0.00  |
| Total PE     |             | Total PE     | 52.19 | 9.10 | 161.35 | 5.17 | 18.97 | 45.08 |
| 659.50       | C36H71O6PN2 | PE-Cer(16:1) | 0.02  | 0.00 | 0.05   | 0.01 | 0.00  | 0.05  |
| 661.50       | C36H73O6PN2 | PE-Cer(16:0) | 0.02  | 0.00 | 0.00   | 0.06 | 0.15  | 0.03  |
| 687.50       | C38H75O6PN2 | PE-Cer(18:1) | 0.53  | 0.07 | 1.35   | 0.01 | 0.05  | 0.33  |
| 689.50       | C38H77O6PN2 | PE-Cer(18:0) | 0.00  | 0.26 | 0.12   | 0.02 | 0.05  | 0.00  |
| 773.60       | C44H89O6PN2 | PE-Cer(24:0) | 0.00  | 0.00 | 0.00   | 0.00 | 0.00  | 0.00  |
| Total PE-Cer |             | Total PE-Cer | 0.58  | 0.33 | 1.52   | 0.11 | 0.24  | 0.41  |
| 672.50       | C37H70O7PN  | ePE(32:3)    | 0.49  | 0.00 | 0.78   | 0.06 | 0.00  | 0.20  |

|           |            |           |       |      |        |      |       |       |
|-----------|------------|-----------|-------|------|--------|------|-------|-------|
| 674.50    | C37H72O7PN | ePE(32:2) | 0.08  | 0.02 | 0.44   | 0.00 | 0.05  | 0.16  |
| 676.50    | C37H74O7PN | ePE(32:1) | 0.45  | 0.00 | 1.88   | 0.00 | 0.00  | 0.97  |
| 678.50    | C37H76O7PN | ePE(32:0) | 21.41 | 3.96 | 65.37  | 1.79 | 5.94  | 14.88 |
| 698.50    | C39H72O7PN | ePE(34:4) | 0.04  | 0.20 | 0.12   | 0.02 | 0.00  | 0.04  |
| 700.50    | C39H74O7PN | ePE(34:3) | 0.83  | 0.01 | 2.92   | 0.01 | 0.12  | 0.85  |
| 702.50    | C39H76O7PN | ePE(34:2) | 7.56  | 1.04 | 25.15  | 0.56 | 2.14  | 9.04  |
| 704.60    | C39H78O7PN | ePE(34:1) | 2.64  | 1.22 | 8.63   | 0.34 | 1.23  | 5.57  |
| 706.60    | C39H80O7PN | ePE(34:0) | 0.26  | 0.00 | 0.89   | 0.04 | 0.00  | 0.16  |
| 724.50    | C41H74O7PN | ePE(36:5) | 0.45  | 0.00 | 1.45   | 0.06 | 0.12  | 0.31  |
| 726.50    | C41H76O7PN | ePE(36:4) | 0.63  | 0.00 | 1.87   | 0.02 | 0.00  | 0.50  |
| 728.60    | C41H78O7PN | ePE(36:3) | 0.28  | 0.19 | 1.36   | 0.03 | 0.28  | 0.18  |
| 730.60    | C41H80O7PN | ePE(36:2) | 0.39  | 0.13 | 1.34   | 0.12 | 0.00  | 0.53  |
| 732.60    | C41H82O7PN | ePE(36:1) | 0.22  | 0.00 | 0.72   | 0.10 | 0.08  | 0.38  |
| 734.60    | C41H84O7PN | ePE(36:0) | 0.01  | 0.03 | 0.08   | 0.00 | 0.00  | 0.01  |
| 750.50    | C43H76O7PN | ePE(38:6) | 0.26  | 0.00 | 1.03   | 0.01 | 0.00  | 0.00  |
| 752.60    | C43H78O7PN | ePE(38:5) | 0.21  | 0.00 | 0.74   | 0.03 | 0.05  | 0.06  |
| 754.60    | C43H80O7PN | ePE(38:4) | 0.09  | 0.00 | 0.25   | 0.00 | 0.00  | 0.14  |
| 756.60    | C43H82O7PN | ePE(38:3) | 0.00  | 0.09 | 0.07   | 0.00 | 0.00  | 0.00  |
| 758.60    | C43H84O7PN | ePE(38:2) | 0.00  | 0.07 | 0.00   | 0.02 | 0.00  | 0.07  |
| 760.60    | C43H86O7PN | ePE(38:1) | 0.01  | 0.00 | 0.07   | 0.00 | 0.00  | 0.07  |
| 762.60    | C43H88O7PN | ePE(38:0) | 0.04  | 0.03 | 0.00   | 0.00 | 0.00  | 0.04  |
| 778.60    | C45H80O7PN | ePE(40:6) | 0.00  | 0.00 | 0.04   | 0.01 | 0.02  | 0.00  |
| 780.60    | C45H82O7PN | ePE(40:5) | 0.00  | 0.11 | 0.05   | 0.01 | 0.00  | 0.02  |
| 782.60    | C45H84O7PN | ePE(40:4) | 0.00  | 0.00 | 0.00   | 0.03 | 0.00  | 0.01  |
| 784.60    | C45H86O7PN | ePE(40:3) | 0.00  | 0.00 | 0.00   | 0.00 | 0.00  | 0.00  |
| 786.60    | C45H88O7PN | ePE(40:2) | 0.00  | 0.00 | 0.00   | 0.00 | 0.00  | 0.00  |
| Total ePE |            | Total ePE | 36.34 | 7.11 | 115.24 | 3.27 | 10.02 | 24.17 |
| 848.50    | C43H75O13P | PI(34:4)  | 0.00  | 0.00 | 0.02   | 0.00 | 0.00  | 0.14  |
| 850.50    | C43H77O13P | PI(34:3)  | 0.01  | 0.00 | 0.00   | 0.00 | 0.38  | 0.23  |
| 852.50    | C43H79O13P | PI(34:2)  | 0.14  | 0.32 | 0.00   | 0.00 | 0.37  | 0.36  |
| 854.50    | C43H81O13P | PI(34:1)  | 0.04  | 0.30 | 0.09   | 0.30 | 0.00  | 0.20  |
| 872.50    | C45H75O13P | PI(36:6)  | 0.02  | 0.32 | 0.00   | 0.00 | 0.01  | 0.32  |
| 874.50    | C45H77O13P | PI(36:5)  | 0.01  | 0.12 | 0.00   | 0.00 | 0.11  | 0.00  |
| 876.50    | C45H79O13P | PI(36:4)  | 0.04  | 0.63 | 0.06   | 0.12 | 0.30  | 0.15  |
| 878.50    | C45H81O13P | PI(36:3)  | 0.02  | 0.00 | 0.06   | 0.15 | 1.12  | 0.08  |
| 880.60    | C45H83O13P | PI(36:2)  | 0.09  | 0.45 | 0.13   | 0.62 | 0.56  | 0.00  |
| 882.60    | C45H85O13P | PI(36:1)  | 0.01  | 0.16 | 0.01   | 0.52 | 0.06  | 0.00  |
| 900.50    | C47H79O13P | PI(38:6)  | 0.04  | 0.16 | 0.04   | 0.00 | 0.09  | 0.06  |
| 902.50    | C47H81O13P | PI(38:5)  | 0.03  | 0.03 | 0.04   | 0.07 | 0.13  | 0.04  |

|          |             |           |      |      |      |      |      |      |
|----------|-------------|-----------|------|------|------|------|------|------|
| 904.60   | C47H83O13P  | PI(38:4)  | 0.04 | 0.54 | 0.13 | 0.59 | 0.00 | 0.10 |
| 906.60   | C47H85O13P  | PI(38:3)  | 0.04 | 0.30 | 0.15 | 0.27 | 0.75 | 0.00 |
| 908.60   | C47H87O13P  | PI(38:2)  | 0.00 | 0.00 | 0.00 | 0.02 | 0.00 | 0.09 |
| 910.60   | C47H89O13P  | PI(38:1)  | 0.01 | 0.12 | 0.00 | 0.07 | 0.00 | 0.03 |
| 912.60   | C47H91O13P  | PI(38:0)  | 0.02 | 0.00 | 0.00 | 0.00 | 0.03 | 0.00 |
| 924.50   | C49H79O13P  | PI(40:8)  | 0.01 | 0.19 | 0.04 | 0.02 | 0.05 | 0.00 |
| 926.50   | C49H81O13P  | PI(40:7)  | 0.00 | 0.52 | 0.01 | 0.07 | 0.39 | 0.08 |
| 928.60   | C49H83O13P  | PI(40:6)  | 0.01 | 0.30 | 0.06 | 0.00 | 0.03 | 0.06 |
| 930.60   | C49H85O13P  | PI(40:5)  | 0.00 | 0.32 | 0.00 | 0.00 | 0.00 | 0.11 |
| 932.60   | C49H87O13P  | PI(40:4)  | 0.02 | 0.17 | 0.00 | 0.07 | 0.05 | 0.06 |
| 934.60   | C49H89O13P  | PI(40:3)  | 0.00 | 0.05 | 0.01 | 0.00 | 0.31 | 0.08 |
| 936.60   | C49H91O13P  | PI(40:2)  | 0.00 | 0.17 | 0.05 | 0.09 | 0.06 | 0.08 |
| 938.60   | C49H93O13P  | PI(40:1)  | 0.01 | 0.00 | 0.01 | 0.04 | 0.35 | 0.07 |
| 940.70   | C49H95O13P  | PI(40:0)  | 0.04 | 0.09 | 0.01 | 0.05 | 0.21 | 0.08 |
| 948.50   | C51H79O13P  | PI(42:10) | 0.01 | 0.00 | 0.00 | 0.03 | 0.01 | 0.09 |
| 950.50   | C51H81O13P  | PI(42:9)  | 0.00 | 0.11 | 0.00 | 0.00 | 0.04 | 0.01 |
| 952.60   | C51H83O13P  | PI(42:8)  | 0.01 | 0.63 | 0.01 | 0.05 | 0.21 | 0.14 |
| 954.60   | C51H85O13P  | PI(42:7)  | 0.01 | 0.40 | 0.02 | 0.00 | 0.00 | 0.04 |
| 956.60   | C51H87O13P  | PI(42:6)  | 0.00 | 0.11 | 0.01 | 0.00 | 0.21 | 0.14 |
| 958.60   | C51H89O13P  | PI(42:5)  | 0.00 | 0.00 | 0.00 | 0.03 | 0.23 | 0.05 |
| 960.60   | C51H91O13P  | PI(42:4)  | 0.01 | 0.07 | 0.00 | 0.01 | 0.00 | 0.16 |
| 962.60   | C51H93O13P  | PI(42:3)  | 0.05 | 0.03 | 0.03 | 0.06 | 0.00 | 0.00 |
| 964.70   | C51H95O13P  | PI(42:2)  | 0.00 | 0.05 | 0.00 | 0.01 | 0.00 | 0.12 |
| 972.50   | C53H79O13P  | PI(44:12) | 0.00 | 0.49 | 0.02 | 0.15 | 0.09 | 0.01 |
| 974.50   | C53H81O13P  | PI(44:11) | 0.01 | 0.00 | 0.00 | 0.00 | 0.08 | 0.03 |
| 976.60   | C53H83O13P  | PI(44:10) | 0.01 | 0.11 | 0.01 | 0.01 | 0.09 | 0.07 |
| 978.60   | C53H85O13P  | PI(44:9)  | 0.01 | 0.03 | 0.00 | 0.01 | 0.01 | 0.07 |
| 980.60   | C53H87O13P  | PI(44:8)  | 0.00 | 0.03 | 0.00 | 0.06 | 0.00 | 0.23 |
| 982.60   | C53H89O13P  | PI(44:7)  | 0.04 | 0.00 | 0.01 | 0.00 | 0.01 | 0.00 |
| 984.60   | C53H91O13P  | PI(44:6)  | 0.06 | 0.24 | 0.07 | 0.02 | 0.03 | 0.00 |
| 986.60   | C53H93O13P  | PI(44:5)  | 0.00 | 0.00 | 0.02 | 0.03 | 0.06 | 0.10 |
| 988.70   | C53H95O13P  | PI(44:4)  | 0.02 | 0.36 | 0.00 | 0.02 | 0.17 | 0.38 |
| 990.70   | C53H97O13P  | PI(44:3)  | 0.00 | 0.04 | 0.01 | 0.07 | 0.26 | 0.00 |
| 992.70   | C53H99O13P  | PI(44:2)  | 0.00 | 0.01 | 0.02 | 0.01 | 0.00 | 0.20 |
| Total PI |             | Total PI  | 0.92 | 7.96 | 1.16 | 3.64 | 6.89 | 4.26 |
| 734.50   | C38H72O10PN | PS(32:1)  | 0.00 | 0.00 | 0.23 | 0.00 | 0.00 | 0.05 |
| 736.50   | C38H74O10PN | PS(32:0)  | 0.23 | 1.00 | 0.57 | 0.19 | 0.81 | 0.19 |
| 756.50   | C40H70O10PN | PS(34:4)  | 0.04 | 0.00 | 0.02 | 0.00 | 0.02 | 0.04 |
| 758.50   | C40H72O10PN | PS(34:3)  | 0.02 | 0.00 | 0.04 | 0.00 | 0.00 | 0.00 |

|        |             |           |      |      |      |      |      |      |
|--------|-------------|-----------|------|------|------|------|------|------|
| 760.50 | C40H74O10PN | PS(34:2)  | 0.50 | 0.64 | 1.38 | 0.36 | 0.37 | 0.26 |
| 762.50 | C40H76O10PN | PS(34:1)  | 0.12 | 0.00 | 0.67 | 0.18 | 0.93 | 0.32 |
| 764.50 | C40H78O10PN | PS(34:0)  | 0.00 | 0.07 | 0.00 | 0.00 | 0.00 | 0.03 |
| 780.50 | C42H70O10PN | PS(36:6)  | 0.00 | 0.07 | 0.03 | 0.00 | 0.06 | 0.07 |
| 782.50 | C42H72O10PN | PS(36:5)  | 0.03 | 0.00 | 0.02 | 0.06 | 0.04 | 0.10 |
| 784.50 | C42H74O10PN | PS(36:4)  | 0.01 | 0.02 | 0.07 | 0.04 | 0.09 | 0.00 |
| 786.50 | C42H76O10PN | PS(36:3)  | 0.03 | 0.00 | 0.09 | 0.03 | 0.38 | 0.01 |
| 788.50 | C42H78O10PN | PS(36:2)  | 0.17 | 1.16 | 0.33 | 0.19 | 0.80 | 0.36 |
| 790.60 | C42H80O10PN | PS(36:1)  | 1.15 | 3.32 | 1.09 | 0.30 | 8.44 | 3.94 |
| 792.60 | C42H82O10PN | PS(36:0)  | 0.02 | 0.64 | 0.00 | 0.01 | 0.89 | 0.06 |
| 806.50 | C44H72O10PN | PS(38:7)  | 0.00 | 0.00 | 0.00 | 0.03 | 0.00 | 0.02 |
| 808.50 | C44H74O10PN | PS(38:6)  | 0.00 | 0.13 | 0.00 | 0.06 | 0.06 | 0.00 |
| 810.50 | C44H76O10PN | PS(38:5)  | 0.01 | 0.00 | 0.02 | 0.03 | 0.00 | 0.04 |
| 812.50 | C44H78O10PN | PS(38:4)  | 0.03 | 0.00 | 0.00 | 0.00 | 0.02 | 0.00 |
| 814.60 | C44H80O10PN | PS(38:3)  | 0.17 | 0.39 | 0.44 | 0.05 | 0.54 | 0.08 |
| 816.60 | C44H82O10PN | PS(38:2)  | 0.05 | 0.29 | 0.08 | 0.00 | 0.09 | 0.03 |
| 818.60 | C44H84O10PN | PS(38:1)  | 0.07 | 0.60 | 0.12 | 0.00 | 0.00 | 0.17 |
| 820.60 | C44H86O10PN | PS(38:0)  | 0.04 | 0.00 | 0.00 | 0.02 | 0.15 | 0.16 |
| 832.50 | C46H74O10PN | PS(40:8)  | 0.00 | 0.00 | 0.03 | 0.07 | 0.10 | 0.00 |
| 834.50 | C46H76O10PN | PS(40:7)  | 0.04 | 0.00 | 0.02 | 0.03 | 0.00 | 0.02 |
| 836.50 | C46H78O10PN | PS(40:6)  | 0.00 | 0.00 | 0.13 | 0.02 | 0.00 | 0.00 |
| 838.60 | C46H80O10PN | PS(40:5)  | 0.01 | 0.00 | 0.01 | 0.02 | 0.15 | 0.00 |
| 840.60 | C46H82O10PN | PS(40:4)  | 0.00 | 0.00 | 0.00 | 0.00 | 0.00 | 0.05 |
| 842.60 | C46H84O10PN | PS(40:3)  | 0.01 | 0.09 | 0.01 | 0.00 | 0.00 | 0.00 |
| 844.60 | C46H86O10PN | PS(40:2)  | 0.06 | 0.17 | 0.00 | 0.04 | 0.39 | 0.02 |
| 846.60 | C46H88O10PN | PS(40:1)  | 0.12 | 0.14 | 0.27 | 0.08 | 0.08 | 0.08 |
| 854.50 | C48H72O10PN | PS(42:11) | 0.00 | 0.06 | 0.00 | 0.00 | 0.00 | 0.05 |
| 856.50 | C48H74O10PN | PS(42:10) | 0.00 | 0.00 | 0.00 | 0.00 | 0.00 | 0.04 |
| 858.50 | C48H76O10PN | PS(42:9)  | 0.00 | 0.21 | 0.05 | 0.00 | 0.00 | 0.02 |
| 860.50 | C48H78O10PN | PS(42:8)  | 0.00 | 0.00 | 0.03 | 0.00 | 0.01 | 0.07 |
| 862.60 | C48H80O10PN | PS(42:7)  | 0.01 | 0.01 | 0.05 | 0.00 | 0.00 | 0.00 |
| 864.60 | C48H82O10PN | PS(42:6)  | 0.01 | 0.00 | 0.00 | 0.00 | 0.11 | 0.00 |
| 866.60 | C48H84O10PN | PS(42:5)  | 0.00 | 0.01 | 0.00 | 0.00 | 0.17 | 0.05 |
| 880.50 | C50H74O10PN | PS(44:12) | 0.01 | 0.03 | 0.00 | 0.00 | 0.00 | 0.01 |
| 882.50 | C50H76O10PN | PS(44:11) | 0.01 | 0.03 | 0.02 | 0.00 | 0.29 | 0.00 |
| 884.50 | C50H78O10PN | PS(44:10) | 0.00 | 0.00 | 0.01 | 0.00 | 0.00 | 0.02 |
| 886.60 | C50H80O10PN | PS(44:9)  | 0.00 | 0.12 | 0.03 | 0.00 | 0.00 | 0.00 |
| 888.60 | C50H82O10PN | PS(44:8)  | 0.00 | 0.00 | 0.02 | 0.01 | 0.08 | 0.00 |
| 890.60 | C50H84O10PN | PS(44:7)  | 0.00 | 0.04 | 0.00 | 0.02 | 0.01 | 0.00 |

|           |             |           |      |      |      |      |       |      |
|-----------|-------------|-----------|------|------|------|------|-------|------|
| 892.60    | C50H86O10PN | PS(44:6)  | 0.02 | 0.06 | 0.02 | 0.00 | 0.00  | 0.05 |
| 894.60    | C50H88O10PN | PS(44:5)  | 0.00 | 0.00 | 0.00 | 0.00 | 0.10  | 0.00 |
| 896.60    | C50H90O10PN | PS(44:4)  | 0.00 | 0.00 | 0.02 | 0.00 | 0.00  | 0.01 |
| 898.60    | C50H92O10PN | PS(44:3)  | 0.00 | 0.00 | 0.00 | 0.00 | 0.06  | 0.01 |
| 900.70    | C50H94O10PN | PS(44:2)  | 0.00 | 0.27 | 0.01 | 0.03 | 0.03  | 0.03 |
| Total PS  |             | Total PS  | 3.01 | 9.58 | 5.94 | 1.88 | 15.27 | 6.45 |
| 746.50    | C40H76O9PN  | ePS(34:2) | 0.51 | 1.91 | 1.46 | 0.46 | 0.82  | 0.79 |
| 748.50    | C40H78O9PN  | ePS(34:1) | 0.23 | 0.34 | 0.50 | 0.04 | 0.04  | 0.17 |
| 772.50    | C42H78O9PN  | ePS(36:3) | 0.04 | 0.06 | 0.03 | 0.04 | 0.00  | 0.01 |
| 774.60    | C42H80O9PN  | ePS(36:2) | 0.02 | 0.00 | 0.12 | 0.04 | 0.00  | 0.02 |
| 776.60    | C42H82O9PN  | ePS(36:1) | 0.07 | 0.23 | 0.06 | 0.04 | 0.45  | 0.34 |
| 778.60    | C42H84O9PN  | ePS(36:0) | 0.02 | 0.00 | 0.00 | 0.01 | 0.06  | 0.01 |
| 794.50    | C44H76O9PN  | ePS(38:6) | 0.03 | 0.00 | 0.05 | 0.01 | 0.01  | 0.04 |
| 796.50    | C44H78O9PN  | ePS(38:5) | 0.00 | 0.04 | 0.06 | 0.00 | 0.00  | 0.00 |
| 798.60    | C44H80O9PN  | ePS(38:4) | 0.01 | 0.00 | 0.00 | 0.00 | 0.00  | 0.07 |
| 800.60    | C44H82O9PN  | ePS(38:3) | 0.00 | 0.00 | 0.00 | 0.00 | 0.00  | 0.00 |
| 802.60    | C44H84O9PN  | ePS(38:2) | 0.00 | 0.00 | 0.00 | 0.00 | 0.00  | 0.00 |
| 804.60    | C44H86O9PN  | ePS(38:1) | 0.02 | 0.24 | 0.01 | 0.04 | 0.00  | 0.05 |
| 824.60    | C46H82O9PN  | ePS(40:5) | 0.00 | 0.00 | 0.00 | 0.00 | 0.00  | 0.00 |
| 826.60    | C46H84O9PN  | ePS(40:4) | 0.00 | 0.00 | 0.00 | 0.00 | 0.00  | 0.06 |
| 828.60    | C46H86O9PN  | ePS(40:3) | 0.00 | 0.00 | 0.01 | 0.00 | 0.52  | 0.08 |
| 830.60    | C46H88O9PN  | ePS(40:2) | 0.01 | 0.32 | 0.00 | 0.00 | 0.00  | 0.00 |
| Total ePS |             | Total ePS | 0.97 | 3.16 | 2.30 | 0.67 | 1.91  | 1.64 |
| 658.40    | C35H61O8P   | PA(32:4)  | 0.00 | 0.03 | 0.01 | 0.02 | 0.01  | 0.00 |
| 660.40    | C35H63O8P   | PA(32:3)  | 0.00 | 0.00 | 0.00 | 0.01 | 0.11  | 0.03 |
| 662.40    | C35H65O8P   | PA(32:2)  | 0.04 | 0.07 | 0.10 | 0.00 | 0.00  | 0.04 |
| 664.50    | C35H67O8P   | PA(32:1)  | 0.01 | 0.28 | 0.08 | 0.19 | 0.03  | 0.06 |
| 666.50    | C35H69O8P   | PA(32:0)  | 0.10 | 0.32 | 0.34 | 0.37 | 0.07  | 0.10 |
| 686.40    | C37H65O8P   | PA(34:4)  | 0.00 | 0.10 | 0.00 | 0.00 | 0.07  | 0.05 |
| 688.50    | C37H67O8P   | PA(34:3)  | 0.01 | 0.02 | 0.07 | 0.09 | 0.11  | 0.00 |
| 690.50    | C37H69O8P   | PA(34:2)  | 0.20 | 1.14 | 0.74 | 0.55 | 0.74  | 0.15 |
| 692.50    | C37H71O8P   | PA(34:1)  | 0.09 | 0.94 | 0.38 | 0.89 | 0.26  | 0.19 |
| 710.40    | C39H65O8P   | PA(36:6)  | 0.00 | 0.02 | 0.00 | 0.00 | 0.02  | 0.03 |
| 712.50    | C39H67O8P   | PA(36:5)  | 0.04 | 0.00 | 0.06 | 0.09 | 0.03  | 0.08 |
| 714.50    | C39H69O8P   | PA(36:4)  | 0.17 | 0.31 | 0.22 | 0.42 | 0.47  | 0.10 |
| 716.50    | C39H71O8P   | PA(36:3)  | 0.06 | 0.40 | 0.21 | 0.31 | 0.12  | 0.04 |
| 718.50    | C39H73O8P   | PA(36:2)  | 0.05 | 1.82 | 0.00 | 0.41 | 0.29  | 0.12 |
| 738.50    | C41H69O8P   | PA(38:6)  | 0.01 | 0.06 | 0.02 | 0.00 | 0.06  | 0.02 |
| 740.50    | C41H71O8P   | PA(38:5)  | 0.00 | 0.33 | 0.02 | 0.04 | 0.00  | 0.02 |

|          |            |           |      |       |       |        |       |       |
|----------|------------|-----------|------|-------|-------|--------|-------|-------|
| 742.50   | C41H73O8P  | PA(38:4)  | 0.00 | 0.62  | 0.01  | 0.24   | 0.07  | 0.00  |
| 744.50   | C41H75O8P  | PA(38:3)  | 0.01 | 0.12  | 0.03  | 0.44   | 0.12  | 0.02  |
| 746.50   | C41H77O8P  | PA(38:2)  | 0.00 | 0.00  | 0.00  | 0.12   | 0.04  | 0.02  |
| 764.50   | C43H71O8P  | PA(40:7)  | 0.00 | 0.00  | 0.02  | 0.01   | 0.00  | 0.00  |
| 766.50   | C43H73O8P  | PA(40:6)  | 0.01 | 0.15  | 0.02  | 0.03   | 0.00  | 0.00  |
| 768.50   | C43H75O8P  | PA(40:5)  | 0.01 | 0.02  | 0.01  | 0.04   | 0.05  | 0.02  |
| Total PA |            | Total PA  | 0.82 | 6.76  | 2.36  | 4.27   | 2.68  | 1.07  |
| 710.50   | C36H69O10P | PG(30:1)  | 0.04 | 0.00  | 0.07  | 0.08   | 0.05  | 0.12  |
| 712.50   | C36H71O10P | PG(30:0)  | 0.05 | 0.40  | 0.56  | 2.25   | 0.84  | 0.17  |
| 736.50   | C38H71O10P | PG(32:2)  | 0.03 | 0.00  | 0.05  | 0.10   | 0.08  | 0.00  |
| 738.50   | C38H73O10P | PG(32:1)  | 0.02 | 0.56  | 0.00  | 0.34   | 0.69  | 0.10  |
| 740.50   | C38H75O10P | PG(32:0)  | 0.20 | 1.39  | 0.60  | 2.99   | 0.85  | 0.40  |
| 760.50   | C40H71O10P | PG(34:4)  | 0.00 | 0.08  | 0.00  | 0.00   | 0.00  | 0.08  |
| 762.50   | C40H73O10P | PG(34:3)  | 0.01 | 0.00  | 0.00  | 0.00   | 0.10  | 0.01  |
| 764.50   | C40H75O10P | PG(34:2)  | 0.07 | 0.45  | 0.00  | 0.00   | 0.52  | 0.09  |
| 766.50   | C40H77O10P | PG(34:1)  | 0.40 | 3.77  | 1.35  | 1.77   | 1.40  | 0.40  |
| 768.50   | C40H79O10P | PG(34:0)  | 0.12 | 0.90  | 0.27  | 1.75   | 0.93  | 0.29  |
| 788.50   | C42H75O10P | PG(36:4)  | 0.01 | 0.00  | 0.00  | 0.11   | 0.55  | 0.08  |
| 790.50   | C42H77O10P | PG(36:3)  | 0.00 | 0.16  | 0.06  | 0.16   | 0.05  | 0.04  |
| 792.50   | C42H79O10P | PG(36:2)  | 0.07 | 1.07  | 0.46  | 0.76   | 1.49  | 0.08  |
| 794.60   | C42H81O10P | PG(36:1)  | 0.04 | 2.01  | 0.27  | 0.80   | 0.10  | 0.07  |
| 812.50   | C44H75O10P | PG(38:6)  | 0.00 | 0.02  | 0.00  | 0.00   | 0.02  | 0.00  |
| 814.50   | C44H77O10P | PG(38:5)  | 0.00 | 0.00  | 0.00  | 0.00   | 0.00  | 0.00  |
| Total PG |            | Total PG  | 1.07 | 10.81 | 3.67  | 11.12  | 7.67  | 1.93  |
|          |            |           |      |       |       |        |       |       |
| 30:1     | C33H66O5N  | 14:0/16:1 | 0.07 | 0.26  | 0.00  | 0.00   | 0.51  | 2.45  |
|          |            | 16:0/14:1 | 0.11 | 0.31  | 4.88  | 15.06  | 2.55  | 2.77  |
| 30:0     | C33H68O5N  | 14:0/16:0 |      |       | 14.84 | 82.32  |       |       |
| 32:1     | C35H70O5N  | 16:0/16:1 | 0.48 | 2.06  | 0.00  | 10.91  | 6.55  | 4.28  |
| 32:0     | C35H72O5N  | 16:0/16:0 | 0.36 | 1.18  | 0.00  | 307.31 | 2.02  | 2.62  |
| 34:4     | C37H68O5N  | 18:3/16:1 | 0.81 | 1.57  | 0.18  | 15.88  | 4.38  | 10.03 |
|          |            | 14:0/20:4 | 0.05 | 1.36  | 1.22  | 3.97   | 0.34  | 0.95  |
|          |            | 14:1/20:3 | 0.04 | 0.09  | 0.79  | 7.42   | 0.82  | 0.27  |
| 34:3     | C37H70O5N  | 18:3/16:0 | 0.22 | 2.83  | 7.00  | 49.67  | 0.31  | 0.87  |
|          |            | 18:2/16:1 | 0.10 | 0.67  | 0.00  | 15.76  | 1.48  | 0.97  |
|          |            | 14:0/20:3 | 0.31 | 1.67  | 0.22  | 1.85   | 0.92  | 0.95  |
| 34:2     | C37H72O5N  | 18:2/16:0 | 0.03 | 0.00  | 66.53 | 354.97 | 0.17  | 0.41  |
|          |            | 18:1/16:1 | 4.93 | 10.76 | 0.00  | 42.51  | 18.98 | 5.30  |
| 34:1     | C37H74O5N  | 18:1/16:0 | 0.86 | 0.46  | 28.95 | 663.49 | 2.15  | 2.70  |



|      |           |           |       |       |       |        |       |      |
|------|-----------|-----------|-------|-------|-------|--------|-------|------|
|      |           | 18:0/16:1 | 7.07  | 7.91  | 0.00  | 24.59  | 10.68 | 9.18 |
| 36:6 | C39H68O5N | 18:3/18:3 | 0.41  | 0.95  | 0.00  | 0.00   | 2.20  | 5.37 |
|      |           | 16:1/20:5 | 0.04  | 0.00  | 0.54  | 10.94  | 0.09  | 0.73 |
| 36:5 | C39H70O5N | 18:3/18:2 | 0.15  | 0.86  | 0.98  | 32.16  | 0.70  | 1.36 |
|      |           | 16:0/20:5 | 0.21  | 0.55  | 1.05  | 0.00   | 0.04  | 1.04 |
|      |           | 16:1/20:4 | 0.70  | 4.52  | 0.00  | 6.90   | 0.71  | 0.29 |
| 36:4 | C39H72O5N | 18:3/18:1 | 0.03  | 0.34  | 1.57  | 81.19  | 0.39  | 0.34 |
|      |           | 18:2/18:2 | 0.81  | 1.84  | 1.17  | 58.75  | 0.78  | 0.17 |
|      |           | 16:0/20:4 | 3.16  | 4.32  | 19.85 | 35.57  | 0.86  | 1.02 |
|      |           | 16:1/20:3 | 0.08  | 0.28  | 0.00  | 6.63   | 4.14  | 1.24 |
| 36:3 | C39H74O5N | 18:3/18:0 | 0.11  | 0.30  | 1.76  | 44.65  | 0.00  | 0.00 |
|      |           | 18:2/18:1 | 0.21  | 0.24  | 2.92  | 196.85 | 0.27  | 0.49 |
|      |           | 16:0/20:3 | 20.51 | 8.71  | 2.44  | 20.47  | 2.39  | 1.17 |
|      |           | 16:1/20:2 | 0.14  | 0.06  | 0.04  | 7.11   | 0.76  | 0.12 |
| 36:2 | C39H76O5N | 18:2/18:0 | 0.29  | 0.07  | 10.21 | 92.47  | 0.55  | 1.75 |
|      |           | 18:1/18:1 | 1.74  | 4.41  | 1.12  | 180.29 | 2.13  | 4.76 |
|      |           | 16:0/20:2 | 40.10 | 10.81 | 1.04  | 22.29  | 4.17  | 2.19 |
| 36:1 | C39H78O5N | 18:1/18:0 | 0.02  | 0.36  | 0.00  | 137.62 | 0.43  | 1.38 |
| 38:7 | C41H70O5N | 18:2/20:5 | 4.89  | 2.59  | 0.67  | 2.31   | 3.64  | 7.56 |
|      |           | 18:3/20:4 | 2.74  | 3.14  | 0.00  | 2.97   | 0.22  | 0.02 |
| 38:6 | C41H72O5N | 18:1/20:5 | 0.02  | 0.00  | 0.07  | 3.46   | 0.00  | 0.00 |
|      |           | 18:2/20:4 | 3.40  | 4.29  | 0.00  | 6.20   | 0.52  | 0.80 |
|      |           | 16:0/22:6 | 0.08  | 1.50  | 3.83  | 7.02   | 0.04  | 0.32 |
|      |           | 16:1/22:5 | 0.00  | 0.30  | 0.00  | 4.17   | 0.83  | 1.31 |
| 38:5 | C41H74O5N | 18:0/20:5 | 0.05  | 0.00  | 0.23  | 4.95   | 0.20  | 0.41 |
|      |           | 18:1/20:4 | 1.45  | 6.63  | 1.35  | 13.83  | 0.32  | 0.68 |
|      |           | 18:2/20:3 | 0.14  | 0.33  | 0.39  | 0.66   | 0.52  | 0.29 |
|      |           | 18:3/20:2 | 0.04  | 0.04  | 0.00  | 0.00   | 0.04  | 0.17 |
|      |           | 16:0/22:5 | 0.04  | 0.07  | 27.10 | 4.91   | 0.00  | 0.58 |
|      |           | 16:1/22:4 | 0.00  | 0.15  | 0.00  | 3.48   | 6.69  | 0.07 |
| 38:4 | C41H76O5N | 18:0/20:4 | 0.09  | 0.50  | 6.02  | 53.29  | 0.34  | 0.95 |
|      |           | 18:1/20:3 | 0.10  | 0.23  | 0.54  | 6.39   | 0.71  | 1.46 |
|      |           | 16:0/22:4 | 0.21  | 0.54  | 22.35 | 18.15  | 0.10  | 0.24 |
| 38:3 | C41H78O5N | 18:0/20:3 | 0.14  | 0.68  | 5.07  | 27.49  | 5.81  | 4.03 |
|      |           | 18:1/20:2 | 0.10  | 0.22  | 0.05  | 14.28  | 0.98  | 0.87 |
| 40:7 | C43H74O5N | 18:1/22:6 | 0.11  | 0.39  | 0.00  | 0.00   | 0.00  | 0.63 |
|      |           | 18:2/22:5 | 0.23  | 0.28  | 0.00  | 0.00   | 0.33  | 2.31 |
|      |           | 18:3/22:4 | 0.21  | 0.46  | 0.00  | 0.00   | 1.41  | 2.99 |
|      |           | 20:2/20:5 | 0.00  | 0.09  | 0.00  | 0.00   | 0.00  | 0.00 |

|        |            |           |        |        |        |        |        |        |
|--------|------------|-----------|--------|--------|--------|--------|--------|--------|
|        |            | 20:3/20:4 | 0.05   | 0.18   | 0.00   | 0.00   | 0.00   | 0.00   |
| 40:6   | C43H76O5N  | 18:0/22:6 | 0.02   | 0.36   | 0.00   | 0.00   | 0.00   | 0.19   |
|        |            | 18:1/22:5 | 0.23   | 0.50   | 0.00   | 0.00   | 0.72   | 3.96   |
|        |            | 18:2/22:4 | 0.23   | 0.38   | 0.00   | 0.00   | 1.28   | 0.85   |
|        |            | 20:2/20:4 | 0.67   | 3.57   | 0.00   | 0.00   | 0.57   | 0.70   |
|        |            | 20:3/20:3 | 0.00   | 0.00   | 0.00   | 0.00   | 0.00   | 0.00   |
| 40:5   | C43H78O5N  | 18:0/22:5 | 0.00   | 0.00   | 0.00   | 0.00   | 0.00   | 0.00   |
|        |            | 18:1/22:4 | 0.00   | 0.29   | 0.00   | 0.00   | 0.99   | 0.10   |
|        |            | 20:2/20:3 | 0.62   | 2.53   | 0.00   | 0.00   | 1.17   | 1.09   |
|        |            | Total DAG | 0.00   | 0.00   | 236.98 | 270.32 | 0.12   | 0.22   |
| 764.67 | C47H90O6N  | 44:2      | 100.00 | 100.00 | 0.13   | 0.01   | 100.00 | 100.00 |
| 766.69 | C47H92O6N  | 44:1      | 0.00   | 0.01   | 0.00   | 0.01   | 0.83   | 0.01   |
| 768.71 | C47H94O6N  | 44:0      | 0.00   | 0.00   | 0.05   | 0.00   | 0.03   | 0.00   |
| 776.71 | C49H94O5N  | e46:3     | 0.00   | 0.00   | 0.00   | 0.00   | 0.51   | 0.00   |
| 778.73 | C49H96O5N  | e46:2     | 0.00   | 0.00   | 0.07   | 0.01   | 0.00   | 0.00   |
| 780.74 | C49H98O5N  | e46:1     | 0.00   | 0.01   | 0.00   | 0.00   | 0.44   | 0.01   |
| 782.76 | C49H100O5N | e46:0     | 0.00   | 0.00   | 0.13   | 0.00   | 1.71   | 0.00   |
| 790.69 | C49H92O6N  | 46:3      | 0.00   | 0.00   | 0.00   | 0.00   | 1.02   | 0.00   |
| 792.71 | C49H94O6N  | 46:2      | 0.00   | 0.00   | 0.01   | 0.00   | 0.00   | 0.00   |
| 794.72 | C49H96O6N  | 46:1      | 0.00   | 0.00   | 0.00   | 0.02   | 0.08   | 0.00   |
| 796.74 | C49H98O6N  | 46:0      | 0.00   | 0.00   | 0.06   | 0.00   | 0.04   | 0.01   |
| 802.73 | C51H96O5N  | e48:4     | 0.00   | 0.00   | 0.00   | 0.00   | 0.93   | 0.00   |
| 804.74 | C51H98O5N  | e48:3     | 0.00   | 0.00   | 0.00   | 0.00   | 0.00   | 0.00   |
| 806.76 | C51H100O5N | e48:2     | 0.00   | 0.00   | 0.00   | 0.00   | 0.06   | 0.00   |
| 808.77 | C51H102O5N | e48:1     | 0.00   | 0.00   | 0.00   | 0.00   | 0.03   | 0.00   |
| 810.79 | C51H104O5N | e48:0     | 0.00   | 0.00   | 0.01   | 0.00   | 0.00   | 0.00   |
| 816.71 | C51H94O6N  | 48:4      | 0.00   | 0.00   | 0.00   | 0.00   | 0.13   | 0.00   |
| 818.72 | C51H96O6N  | 48:3      | 0.00   | 0.00   | 0.00   | 0.00   | 0.00   | 0.00   |
| 820.74 | C51H98O6N  | 48:2      | 0.00   | 0.00   | 0.00   | 0.01   | 0.02   | 0.00   |
| 822.75 | C51H100O6N | 48:1      | 0.00   | 0.00   | 0.00   | 0.01   | 0.02   | 0.00   |
| 824.77 | C51H102O6N | 48:0      | 0.00   | 0.00   | 0.00   | 0.00   | 0.01   | 0.00   |
| 830.76 | C53H100O5N | e50:4     | 0.00   | 0.00   | 0.00   | 0.00   | 0.00   | 0.00   |
| 832.77 | C53H102O5N | e50:3     | 0.00   | 0.00   | 0.00   | 0.00   | 0.00   | 0.00   |
| 834.79 | C53H104O5N | e50:2     | 0.00   | 0.00   | 0.00   | 0.00   | 0.00   | 0.01   |
| 836.80 | C53H106O5N | e50:1     | 0.00   | 0.00   | 0.00   | 0.00   | 0.01   | 0.00   |
| 838.82 | C53H108O5N | e50:0     | 0.00   | 0.00   | 0.00   | 0.00   | 0.00   | 0.00   |
| 844.74 | C53H98O6N  | 50:4      | 0.00   | 0.00   | 0.00   | 0.00   | 0.00   | 0.00   |
| 846.75 | C53H100O6N | 50:3      | 0.00   | 0.00   | 0.00   | 0.00   | 0.00   | 0.00   |
| 848.77 | C53H102O6N | 50:2      | 0.00   | 0.00   | 0.00   | 0.01   | 0.00   | 0.00   |

|        |            |            |      |      |      |      |      |      |
|--------|------------|------------|------|------|------|------|------|------|
| 850.78 | C53H104O6N | 50:1       | 0.00 | 0.00 | 0.00 | 0.00 | 0.00 | 0.00 |
| 852.80 | C53H106O6N | 50:0       | 0.00 | 0.00 | 0.00 | 0.00 | 0.01 | 0.00 |
| 856.77 | C55H102O5N | e52:5      | 0.00 | 0.00 | 0.00 | 0.00 | 0.00 | 0.00 |
| 858.79 | C55H104O5N | e52:4      | 0.00 | 0.00 | 0.00 | 0.00 | 0.00 | 0.00 |
| 860.80 | C55H106O5N | e52:3      | 0.00 | 0.00 | 0.00 | 0.01 | 0.00 | 0.00 |
| 862.82 | C55H108O5N | e52:2      | 0.00 | 0.00 | 0.00 | 0.00 | 0.00 | 0.00 |
| 864.84 | C55H110O5N | e52:1      | 0.00 | 0.00 | 0.00 | 0.00 | 0.00 | 0.00 |
| 866.85 | C55H112O5N | e52:0      | 0.00 | 0.00 | 0.00 | 0.00 | 0.06 | 0.00 |
| 868.74 | C55H98O6N  | 52:6       | 0.00 | 0.00 | 0.00 | 0.00 | 0.01 | 0.00 |
| 870.75 | C55H100O6N | 52:5       | 0.00 | 0.00 | 0.00 | 0.00 | 0.01 | 0.00 |
| 872.77 | C55H102O6N | 52:4       | 0.00 | 0.00 | 0.00 | 0.00 | 0.00 | 0.00 |
| 874.78 | C55H104O6N | 52:3       | 0.00 | 0.00 | 0.00 | 0.00 | 0.00 | 0.00 |
| 876.80 | C55H106O6N | 52:2       | 0.00 | 0.00 | 0.00 | 0.00 | 0.01 | 0.00 |
| 878.81 | C55H108O6N | 52:1       | 0.00 | 0.00 | 0.00 | 0.00 | 0.00 | 0.00 |
| 880.83 | C55H110O6N | 52:0/e54:7 | 0.00 | 0.00 | 0.00 | 0.00 | 0.00 | 0.00 |
| 882.79 | C57H104O5N | e54:6      | 0.00 | 0.00 | 0.00 | 0.00 | 0.01 | 0.00 |
| 884.80 | C57H106O5N | e54:5      | 0.00 | 0.01 | 0.00 | 0.00 | 0.00 | 0.00 |
| 886.82 | C57H108O5N | e54:4      | 0.00 | 0.00 | 0.00 | 0.00 | 0.00 | 0.00 |
| 888.84 | C57H110O5N | e54:3      | 0.00 | 0.00 | 0.00 | 0.00 | 0.00 | 0.00 |
| 890.85 | C57H112O5N | e54:2      | 0.00 | 0.00 | 0.00 | 0.00 | 0.00 | 0.00 |
| 892.87 | C57H114O5N | e54:1      | 0.00 | 0.00 | 0.00 | 0.00 | 0.00 | 0.00 |
| 894.75 | C57H100O6N | 54:7/e54:0 | 0.00 | 0.00 | 0.00 | 0.00 | 0.00 | 0.00 |
| 896.77 | C57H102O6N | 54:6       | 0.00 | 0.00 | 0.00 | 0.00 | 0.00 | 0.00 |
| 898.78 | C57H104O6N | 54:5       | 0.00 | 0.00 | 0.00 | 0.00 | 0.00 | 0.00 |
| 900.80 | C57H106O6N | 54:4       | 0.00 | 0.00 | 0.00 | 0.00 | 0.00 | 0.00 |
| 902.81 | C57H108O6N | 54:3       | 0.00 | 0.00 | 0.00 | 0.00 | 0.00 | 0.00 |
| 904.83 | C57H110O6N | 54:2       | 0.00 | 0.00 | 0.00 | 0.00 | 0.00 | 0.00 |
| 906.85 | C57H112O6N | 54:1       | 0.00 | 0.00 | 0.00 | 0.00 | 0.00 | 0.00 |
| 908.86 | C57H114O6N | 54:0/e56:7 | 0.00 | 0.00 | 0.00 | 0.00 | 0.00 | 0.00 |
| 910.82 | C59H108O5N | e56:6      | 0.00 | 0.00 | 0.00 | 0.00 | 0.00 | 0.00 |
| 912.84 | C59H110O5N | e56:5      | 0.00 | 0.00 | 0.00 | 0.00 | 0.01 | 0.00 |
| 914.85 | C59H112O5N | e56:4      | 0.00 | 0.00 | 0.00 | 0.00 | 0.00 | 0.00 |
| 916.87 | C59H114O5N | e56:3      | 0.00 | 0.00 | 0.00 | 0.00 | 0.00 | 0.00 |
| 918.88 | C59H116O5N | e56:2      | 0.00 | 0.00 | 0.00 | 0.00 | 0.00 | 0.00 |
| 920.90 | C59H118O5N | e56:1      | 0.00 | 0.00 | 0.00 | 0.00 | 0.00 | 0.00 |
| 922.78 | C59H104O6N | 56:7/e56:0 | 0.00 | 0.00 | 0.00 | 0.00 | 0.01 | 0.00 |
| 924.80 | C59H106O6N | 56:6       | 0.00 | 0.00 | 0.00 | 0.00 | 0.00 | 0.00 |
| 926.81 | C59H108O6N | 56:5       | 0.00 | 0.00 | 0.00 | 0.00 | 0.00 | 0.00 |
| 928.83 | C59H110O6N | 56:4       | 0.00 | 0.00 | 0.00 | 0.00 | 0.00 | 0.00 |

|                                            |            |                                            |      |      |      |      |      |      |
|--------------------------------------------|------------|--------------------------------------------|------|------|------|------|------|------|
| 930.85                                     | C59H112O6N | 56:3                                       | 0.00 | 0.00 | 0.00 | 0.00 | 0.03 | 0.00 |
| 932.86                                     | C59H114O6N | 56:2                                       | 0.00 | 0.00 | 0.00 | 0.00 | 0.00 | 0.00 |
| 934.88                                     | C59H116O6N | 56:1                                       | 0.00 | 0.00 | 0.00 | 0.00 | 0.00 | 0.00 |
| 936.84                                     | C61H110O5N | e58:7/56:0                                 | 0.00 | 0.00 | 0.00 | 0.00 | 0.00 | 0.00 |
| 938.85                                     | C61H112O5N | e58:6                                      | 0.00 | 0.00 | 0.00 | 0.00 | 0.00 | 0.00 |
| 940.87                                     | C61H114O5N | e58:5                                      | 0.00 | 0.00 | 0.00 | 0.00 | 0.00 | 0.00 |
| 942.88                                     | C61H116O5N | e58:4                                      | 0.00 | 0.00 | 0.00 | 0.00 | 0.00 | 0.00 |
| 944.90                                     | C61H118O5N | e58:3                                      | 0.00 | 0.00 | 0.00 | 0.00 | 0.01 | 0.00 |
| 946.91                                     | C61H120O5N | e58:2                                      | 0.00 | 0.00 | 0.00 | 0.00 | 0.00 | 0.00 |
| 948.93                                     | C61H122O5N | e58:1/58:8                                 | 0.00 | 0.00 | 0.00 | 0.00 | 0.01 | 0.00 |
| 950.81                                     | C61H108O6N | 58:7/e58:0                                 | 0.00 | 0.00 | 0.00 | 0.00 | 0.00 | 0.00 |
| 952.83                                     | C61H110O6N | 58:6                                       | 0.00 | 0.00 | 0.00 | 0.00 | 0.01 | 0.00 |
| 954.85                                     | C61H112O6N | 58:5                                       | 0.00 | 0.00 | 0.00 | 0.00 | 0.00 | 0.00 |
| 956.86                                     | C61H114O6N | 58:4                                       | 0.00 | 0.00 | 0.00 | 0.00 | 0.00 | 0.00 |
| 958.88                                     | C61H116O6N | 58:3                                       | 0.00 | 0.00 | 0.00 | 0.00 | 0.00 | 0.00 |
| 960.89                                     | C61H118O6N | 58:2                                       | 0.00 | 0.00 | 0.00 | 0.00 | 0.00 | 0.00 |
| 962.91                                     | C61H120O6N | 58:1                                       | 0.00 | 0.00 | 0.00 | 0.00 | 0.01 | 0.00 |
| 964.87                                     | C63H114O5N | e60:7/58:0                                 | 0.00 | 0.00 | 0.00 | 0.00 | 0.01 | 0.00 |
| 966.88                                     | C63H116O5N | e60:6                                      | 0.00 | 0.00 | 0.00 | 0.00 | 0.00 | 0.00 |
| 968.90                                     | C63H118O5N | e60:5                                      | 0.00 | 0.00 | 0.00 | 0.00 | 0.00 | 0.00 |
| 970.91                                     | C63H120O5N | e60:4                                      | 0.00 | 0.00 | 0.00 | 0.00 | 0.00 | 0.00 |
| 972.93                                     | C63H122O5N | e60:3                                      | 0.00 | 0.00 | 0.00 | 0.00 | 0.00 | 0.00 |
| 974.94                                     | C63H124O5N | e60:2                                      | 0.00 | 0.00 | 0.00 | 0.00 | 0.00 | 0.00 |
| 976.83                                     | C63H110O6N | 60:8/e60:1                                 | 0.00 | 0.00 | 0.00 | 0.00 | 0.00 | 0.00 |
| 978.85                                     | C63H112O6N | 60:7/e60:0                                 | 0.00 | 0.00 | 0.00 | 0.00 | 0.01 | 0.00 |
| 980.86                                     | C63H114O6N | 60:6                                       | 0.00 | 0.00 | 0.00 | 0.00 | 0.00 | 0.00 |
| 982.88                                     | C63H116O6N | 60:5                                       | 0.00 | 0.00 | 0.00 | 0.00 | 0.00 | 0.00 |
| 984.89                                     | C63H118O6N | 60:4                                       | 0.00 | 0.00 | 0.00 | 0.00 | 0.00 | 0.00 |
| 986.91                                     | C63H120O6N | 60:3                                       | 0.00 | 0.00 | 0.00 | 0.00 | 0.00 | 0.00 |
| 988.92                                     | C63H122O6N | 60:2                                       | 0.00 | 0.00 | 0.00 | 0.00 | 0.03 | 0.00 |
| 990.94                                     | C63H124O6N | 60:1                                       | 0.00 | 0.00 | 0.00 | 0.00 | 0.00 | 0.00 |
| Total NL<br>243 14:1<br>acyl<br>containing |            | Total NL<br>243 14:1<br>acyl<br>containing | 0.00 | 0.00 | 0.52 | 0.15 | 0.01 | 0.00 |
| 764.67                                     | C47H90O6N  | 44:2                                       | 0.06 | 0.11 | 0.00 | 0.00 | 6.13 | 0.10 |
| 766.69                                     | C47H92O6N  | 44:1                                       | 0.00 | 0.00 | 0.01 | 0.04 | 0.00 | 0.00 |
| 768.71                                     | C47H94O6N  | 44:0                                       | 0.00 | 0.00 | 0.01 | 0.27 | 0.08 | 0.00 |
| 776.71                                     | C49H94O5N  | e46:3                                      | 0.01 | 0.02 | 0.00 | 0.00 | 0.25 | 0.03 |
| 778.73                                     | C49H96O5N  | e46:2                                      | 0.00 | 0.00 | 0.00 | 0.00 | 0.00 | 0.00 |

|        |            |            |      |      |      |      |      |      |
|--------|------------|------------|------|------|------|------|------|------|
| 780.74 | C49H98O5N  | e46:1      | 0.00 | 0.00 | 0.00 | 0.00 | 0.02 | 0.00 |
| 782.76 | C49H100O5N | e46:0      | 0.01 | 0.01 | 0.01 | 0.04 | 0.21 | 0.02 |
| 790.69 | C49H92O6N  | 46:3       | 0.00 | 0.00 | 0.00 | 0.00 | 0.12 | 0.01 |
| 792.71 | C49H94O6N  | 46:2       | 0.00 | 0.00 | 0.00 | 0.01 | 0.00 | 0.00 |
| 794.72 | C49H96O6N  | 46:1       | 0.00 | 0.00 | 0.00 | 0.07 | 0.04 | 0.00 |
| 796.74 | C49H98O6N  | 46:0       | 0.01 | 0.01 | 0.02 | 0.38 | 0.05 | 0.01 |
| 802.73 | C51H96O5N  | e48:4      | 0.02 | 0.08 | 0.00 | 0.00 | 0.30 | 0.11 |
| 804.74 | C51H98O5N  | e48:3      | 0.00 | 0.00 | 0.00 | 0.00 | 0.01 | 0.00 |
| 806.76 | C51H100O5N | e48:2      | 0.00 | 0.00 | 0.00 | 0.00 | 0.00 | 0.00 |
| 808.77 | C51H102O5N | e48:1      | 0.00 | 0.00 | 0.00 | 0.01 | 0.01 | 0.00 |
| 810.79 | C51H104O5N | e48:0      | 0.00 | 0.00 | 0.00 | 0.03 | 0.06 | 0.00 |
| 816.71 | C51H94O6N  | 48:4       | 0.00 | 0.00 | 0.00 | 0.00 | 0.03 | 0.01 |
| 818.72 | C51H96O6N  | 48:3       | 0.00 | 0.00 | 0.00 | 0.00 | 0.00 | 0.00 |
| 820.74 | C51H98O6N  | 48:2       | 0.00 | 0.00 | 0.00 | 0.06 | 0.00 | 0.00 |
| 822.75 | C51H100O6N | 48:1       | 0.01 | 0.01 | 0.01 | 0.19 | 0.00 | 0.01 |
| 824.77 | C51H102O6N | 48:0       | 0.02 | 0.03 | 0.01 | 0.63 | 0.14 | 0.03 |
| 830.76 | C53H100O5N | e50:4      | 0.01 | 0.21 | 0.00 | 0.00 | 0.31 | 0.33 |
| 832.77 | C53H102O5N | e50:3      | 0.00 | 0.00 | 0.00 | 0.00 | 0.00 | 0.00 |
| 834.79 | C53H104O5N | e50:2      | 0.00 | 0.00 | 0.00 | 0.01 | 0.01 | 0.00 |
| 836.80 | C53H106O5N | e50:1      | 0.00 | 0.00 | 0.00 | 0.01 | 0.01 | 0.00 |
| 838.82 | C53H108O5N | e50:0      | 0.00 | 0.00 | 0.00 | 0.02 | 0.05 | 0.00 |
| 844.74 | C53H98O6N  | 50:4       | 0.00 | 0.00 | 0.00 | 0.01 | 0.06 | 0.01 |
| 846.75 | C53H100O6N | 50:3       | 0.00 | 0.02 | 0.00 | 0.04 | 0.03 | 0.00 |
| 848.77 | C53H102O6N | 50:2       | 0.03 | 0.01 | 0.00 | 0.11 | 0.01 | 0.00 |
| 850.78 | C53H104O6N | 50:1       | 0.04 | 0.02 | 0.00 | 0.26 | 0.05 | 0.02 |
| 852.80 | C53H106O6N | 50:0       | 0.00 | 0.02 | 0.02 | 0.60 | 0.03 | 0.03 |
| 856.77 | C55H102O5N | e52:5      | 0.01 | 0.20 | 0.01 | 0.00 | 0.15 | 0.35 |
| 858.79 | C55H104O5N | e52:4      | 0.00 | 0.00 | 0.00 | 0.00 | 0.00 | 0.00 |
| 860.80 | C55H106O5N | e52:3      | 0.00 | 0.00 | 0.00 | 0.00 | 0.06 | 0.00 |
| 862.82 | C55H108O5N | e52:2      | 0.00 | 0.00 | 0.00 | 0.00 | 0.00 | 0.00 |
| 864.84 | C55H110O5N | e52:1      | 0.00 | 0.00 | 0.00 | 0.00 | 0.00 | 0.00 |
| 866.85 | C55H112O5N | e52:0      | 0.00 | 0.00 | 0.00 | 0.01 | 0.02 | 0.00 |
| 868.74 | C55H98O6N  | 52:6       | 0.00 | 0.00 | 0.00 | 0.00 | 0.01 | 0.00 |
| 870.75 | C55H100O6N | 52:5       | 0.00 | 0.00 | 0.00 | 0.00 | 0.00 | 0.00 |
| 872.77 | C55H102O6N | 52:4       | 0.00 | 0.00 | 0.00 | 0.00 | 0.00 | 0.00 |
| 874.78 | C55H104O6N | 52:3       | 0.00 | 0.00 | 0.00 | 0.01 | 0.00 | 0.00 |
| 876.80 | C55H106O6N | 52:2       | 0.00 | 0.00 | 0.00 | 0.01 | 0.01 | 0.00 |
| 878.81 | C55H108O6N | 52:1       | 0.00 | 0.00 | 0.00 | 0.01 | 0.01 | 0.00 |
| 880.83 | C55H110O6N | 52:0/e54:7 | 0.00 | 0.00 | 0.00 | 0.02 | 0.16 | 0.00 |

|        |            |            |      |      |      |      |      |      |
|--------|------------|------------|------|------|------|------|------|------|
| 882.79 | C57H104O5N | e54:6      | 0.00 | 0.00 | 0.00 | 0.00 | 0.02 | 0.01 |
| 884.80 | C57H106O5N | e54:5      | 0.00 | 0.00 | 0.00 | 0.00 | 0.01 | 0.00 |
| 886.82 | C57H108O5N | e54:4      | 0.00 | 0.00 | 0.00 | 0.00 | 0.02 | 0.00 |
| 888.84 | C57H110O5N | e54:3      | 0.00 | 0.00 | 0.00 | 0.00 | 0.00 | 0.00 |
| 890.85 | C57H112O5N | e54:2      | 0.00 | 0.00 | 0.00 | 0.00 | 0.00 | 0.00 |
| 892.87 | C57H114O5N | e54:1      | 0.00 | 0.00 | 0.00 | 0.00 | 0.00 | 0.00 |
| 894.75 | C57H100O6N | 54:7/e54:0 | 0.00 | 0.00 | 0.00 | 0.00 | 0.00 | 0.00 |
| 896.77 | C57H102O6N | 54:6       | 0.00 | 0.00 | 0.00 | 0.00 | 0.00 | 0.00 |
| 898.78 | C57H104O6N | 54:5       | 0.00 | 0.00 | 0.00 | 0.00 | 0.00 | 0.00 |
| 900.80 | C57H106O6N | 54:4       | 0.00 | 0.00 | 0.00 | 0.00 | 0.00 | 0.00 |
| 902.81 | C57H108O6N | 54:3       | 0.00 | 0.00 | 0.00 | 0.00 | 0.00 | 0.00 |
| 904.83 | C57H110O6N | 54:2       | 0.00 | 0.00 | 0.00 | 0.00 | 0.00 | 0.00 |
| 906.85 | C57H112O6N | 54:1       | 0.00 | 0.00 | 0.00 | 0.00 | 0.00 | 0.00 |
| 908.86 | C57H114O6N | 54:0/e56:7 | 0.00 | 0.00 | 0.00 | 0.00 | 0.00 | 0.00 |
| 910.82 | C59H108O5N | e56:6      | 0.00 | 0.00 | 0.00 | 0.00 | 0.00 | 0.00 |
| 912.84 | C59H110O5N | e56:5      | 0.00 | 0.00 | 0.00 | 0.00 | 0.01 | 0.00 |
| 914.85 | C59H112O5N | e56:4      | 0.00 | 0.00 | 0.00 | 0.00 | 0.00 | 0.00 |
| 916.87 | C59H114O5N | e56:3      | 0.00 | 0.00 | 0.00 | 0.00 | 0.00 | 0.01 |
| 918.88 | C59H116O5N | e56:2      | 0.00 | 0.00 | 0.00 | 0.00 | 0.00 | 0.00 |
| 920.90 | C59H118O5N | e56:1      | 0.00 | 0.00 | 0.00 | 0.00 | 0.00 | 0.00 |
| 922.78 | C59H104O6N | 56:7/e56:0 | 0.00 | 0.00 | 0.00 | 0.00 | 0.01 | 0.00 |
| 924.80 | C59H106O6N | 56:6       | 0.00 | 0.00 | 0.00 | 0.00 | 0.02 | 0.00 |
| 926.81 | C59H108O6N | 56:5       | 0.00 | 0.00 | 0.00 | 0.00 | 0.00 | 0.00 |
| 928.83 | C59H110O6N | 56:4       | 0.00 | 0.00 | 0.00 | 0.00 | 0.01 | 0.00 |
| 930.85 | C59H112O6N | 56:3       | 0.00 | 0.00 | 0.00 | 0.00 | 0.00 | 0.00 |
| 932.86 | C59H114O6N | 56:2       | 0.00 | 0.00 | 0.00 | 0.00 | 0.01 | 0.00 |
| 934.88 | C59H116O6N | 56:1       | 0.00 | 0.00 | 0.00 | 0.00 | 0.00 | 0.00 |
| 936.84 | C61H110O5N | e58:7/56:0 | 0.00 | 0.00 | 0.00 | 0.00 | 0.02 | 0.00 |
| 938.85 | C61H112O5N | e58:6      | 0.00 | 0.00 | 0.00 | 0.00 | 0.00 | 0.00 |
| 940.87 | C61H114O5N | e58:5      | 0.00 | 0.00 | 0.00 | 0.00 | 0.00 | 0.00 |
| 942.88 | C61H116O5N | e58:4      | 0.00 | 0.00 | 0.00 | 0.00 | 0.00 | 0.00 |
| 944.90 | C61H118O5N | e58:3      | 0.00 | 0.00 | 0.00 | 0.00 | 0.00 | 0.00 |
| 946.91 | C61H120O5N | e58:2      | 0.00 | 0.00 | 0.00 | 0.00 | 0.00 | 0.00 |
| 948.93 | C61H122O5N | e58:1/58:8 | 0.00 | 0.00 | 0.00 | 0.00 | 0.01 | 0.00 |
| 950.81 | C61H108O6N | 58:7/e58:0 | 0.00 | 0.00 | 0.00 | 0.00 | 0.01 | 0.00 |
| 952.83 | C61H110O6N | 58:6       | 0.00 | 0.00 | 0.00 | 0.00 | 0.01 | 0.00 |
| 954.85 | C61H112O6N | 58:5       | 0.00 | 0.00 | 0.00 | 0.00 | 0.01 | 0.00 |
| 956.86 | C61H114O6N | 58:4       | 0.00 | 0.00 | 0.00 | 0.00 | 0.01 | 0.00 |
| 958.88 | C61H116O6N | 58:3       | 0.00 | 0.00 | 0.00 | 0.00 | 0.00 | 0.00 |

|                                            |                              |                                            |        |        |        |        |      |      |
|--------------------------------------------|------------------------------|--------------------------------------------|--------|--------|--------|--------|------|------|
| 960.89                                     | C61H118O6N                   | 58:2                                       | 0.00   | 0.00   | 0.00   | 0.00   | 0.00 | 0.00 |
| 962.91                                     | C61H120O6N                   | 58:1                                       | 0.00   | 0.00   | 0.00   | 0.00   | 0.01 | 0.00 |
| 964.87                                     | C63H114O5N                   | e60:7/58:0                                 | 0.00   | 0.00   | 0.00   | 0.00   | 0.00 | 0.00 |
| 966.88                                     | C63H116O5N                   | e60:6                                      | 0.00   | 0.00   | 0.00   | 0.01   | 0.00 | 0.00 |
| 968.90                                     | C63H118O5N                   | e60:5                                      | 0.00   | 0.00   | 0.00   | 0.00   | 0.00 | 0.00 |
| 970.91                                     | C63H120O5N                   | e60:4                                      | 0.00   | 0.00   | 0.00   | 0.00   | 0.01 | 0.00 |
| 972.93                                     | C63H122O5N                   | e60:3                                      | 0.00   | 0.00   | 0.00   | 0.01   | 0.01 | 0.00 |
| 974.94                                     | C63H124O5N                   | e60:2                                      | 0.00   | 0.00   | 0.00   | 0.00   | 0.00 | 0.00 |
| 976.83                                     | C63H110O6N                   | 60:8/e60:1                                 | 0.00   | 0.00   | 0.00   | 0.00   | 0.01 | 0.00 |
| 978.85                                     | C63H112O6N                   | 60:7/e60:0                                 | 0.00   | 0.00   | 0.00   | 0.00   | 0.00 | 0.00 |
| 980.86                                     | C63H114O6N                   | 60:6                                       | 0.00   | 0.00   | 0.00   | 0.00   | 0.01 | 0.00 |
| 982.88                                     | C63H116O6N                   | 60:5                                       | 0.00   | 0.00   | 0.00   | 0.00   | 0.00 | 0.00 |
| 984.89                                     | C63H118O6N                   | 60:4                                       | 0.00   | 0.00   | 0.00   | 0.00   | 0.00 | 0.00 |
| 986.91                                     | C63H120O6N                   | 60:3                                       | 0.00   | 0.00   | 0.00   | 0.00   | 0.00 | 0.00 |
| 988.92                                     | C63H122O6N                   | 60:2                                       | 0.00   | 0.00   | 0.00   | 0.00   | 0.01 | 0.00 |
| 990.94                                     | C63H124O6N                   | 60:1                                       | 0.00   | 0.00   | 0.00   | 0.00   | 0.00 | 0.00 |
| Total NL<br>245 14:0<br>acyl<br>containing |                              | Total NL<br>245 14:0<br>acyl<br>containing | 0.21   | 0.69   | 0.14   | 2.88   | 2.53 | 1.01 |
|                                            | Cholesterol                  |                                            | 20.12  | 30.25  | 40.61  | 132.20 |      |      |
|                                            | Acylcarnitine (AC)<br>(pmol) |                                            |        |        |        |        |      |      |
| 370.3                                      | 14:1                         |                                            | 0.0004 | 0.0005 | 0.0006 | 0.0009 |      |      |
| 372.31                                     | 14:0                         |                                            | 0.0010 | 0.0009 | 0.0012 | 0.0014 |      |      |
| 398.33                                     | 16:1                         |                                            | 0.0008 | 0.0010 | 0.0012 | 0.0014 |      |      |
| 400.34                                     | 16:0                         |                                            | 0.0012 | 0.0015 | 0.0022 | 0.0050 |      |      |
| 414.32                                     | 16:1-OH                      |                                            | 0.0009 | 0.0001 | 0.0013 | 0.0022 |      |      |
| 416.34                                     | 16:0-OH                      |                                            | 0.0001 | 0.0001 | 0.0002 | 0.0003 |      |      |
| 424.34                                     | 18:2                         |                                            | 0.0009 | 0.0005 | 0.0017 | 0.0020 |      |      |
| 426.36                                     | 18:1                         |                                            | 0.0019 | 0.0025 | 0.0029 | 0.0048 |      |      |
| 428.37                                     | 18:0                         |                                            | 0.0014 | 0.0055 | 0.0029 | 0.0136 |      |      |
| 442.35                                     | 18:1-OH                      |                                            | 0.0004 | 0.0002 | 0.0008 | 0.0021 |      |      |
| 444.37                                     | 18:0-OH                      |                                            | 0.0005 | 0.0001 | 0.0009 | 0.0029 |      |      |
|                                            | Total Acylcarnitine          |                                            | 0.0095 | 0.0131 | 0.0234 | 0.0451 |      |      |
|                                            | Ceramide (CER)               |                                            |        |        |        |        |      |      |
| 536.5                                      | N16:0                        |                                            | 0.1456 | 0.8123 | 0.224  | 1.072  |      |      |
| 562.52                                     | N18:1                        |                                            | 0.0587 | 0.7485 | 0.112  | 0.917  |      |      |
| 564.54                                     | N18:0                        |                                            | 0.0452 | 0.6874 | 0.060  | 0.899  |      |      |
| 646.61                                     | N24:1                        |                                            | 0.0587 | 0.0052 | 0.079  | 0.015  |      |      |
| 648.63                                     | N24:0                        |                                            | 0.0354 | 0.0235 | 0.066  | 0.058  |      |      |

|  |                |        |        |       |       |
|--|----------------|--------|--------|-------|-------|
|  | Total Ceramide | 0.3436 | 2.2769 | 0.542 | 2.961 |
|--|----------------|--------|--------|-------|-------|

**Supplementary Table 4. Detail description of 60% high fat diet and regular chow diet.**

| Class description | Ingredient                             | Grams |
|-------------------|----------------------------------------|-------|
| Protein           | Casein, Lactic, 30Mesh                 | 200   |
| Protein           | Cystine, L                             | 3     |
| Carbohydrate      | Lodex 10,                              | 125   |
| Carbohydrate      | Fine granulated<br>Sucrose             | 72.8  |
| Fiber             | Solka Floc, FCC200                     | 50    |
| Fat               | Lard                                   | 245   |
| Fat               | Soybean oil, USP                       | 25    |
| Mineral           | S10026B                                | 50    |
| Vitamin           | Choline bitartrate                     | 2     |
| Vitamin           | V10001C                                | 1     |
| Dye               | Dye Blue FD&C #1,<br>Alum. Lake 35-42% | 0.05  |

| Caloric information |       |
|---------------------|-------|
| Protein             | 20%   |
| Fat                 | 60%   |
| Carbohydrate        | 20%   |
| Energy density      | 5.21% |

**Regular chow diet composition.**

| Nutrients                | %100g |
|--------------------------|-------|
| Carbohydrate             | 48.8  |
| Protein                  | 21.0  |
| Fat                      | 3.0   |
| Calcium                  | 0.8   |
| Phosphorous              | 0.4   |
| Fiber                    | 5.0   |
| Moisture                 | 13.0  |
| Ash                      | 8.0   |
| Total energy (kcal/100g) | 306.2 |



**Supplementary Table 5. List of mouse primers used in the study**

|     | <b>Target name</b> | <b>Forward (Primer sequence 5' – 3')</b> | <b>Reverse (Primer sequence 5' – 3')</b> |
|-----|--------------------|------------------------------------------|------------------------------------------|
| 1.  | mAhR               | GGCTTTCAGCAGTCTGATGTC                    | CATGAAAGAAGCGTTCTCTGG                    |
| 2.  | mIRS2              | GTCCAGGCACTGGAGCTTT                      | GCTGGTAGCGCTTCACTCTT                     |
| 3.  | mIRS1              | TTTGAAGACCATAACCCACCAC                   | ATTACACCAGTTCGTCCCTTTC                   |
| 4.  | mIRS2              | TCCAGAACGGCCTCAACTAT                     | AGTGATGGGACAGGAAGTCG                     |
| 5.  | mLDLR              | TCAGACGAACAAGGCTGTCC                     | CCATCTAGGCAATCTCGGTCTC                   |
| 6.  | mPtpn1             | GGAACTGGGCGGCTATTTACC                    | CAAAAGGGCTGACATCTCGGT                    |
| 7.  | mJUN               | TTCCTCCAGTCCGAGAGCG                      | TGAGAAGGTCCGAGTTCTTGG                    |
| 8.  | mCyp1a1            | GCCACATCCGGGACATCAC                      | GCTGGACATTGGCATTCTCGT                    |
| 9.  | mCyp1a2            | AGTACATCTCCTTAGCCCCAG                    | GGTCCGGGTGGATTCTTCAG                     |
| 10. | mCyp1b1            | CCACCAGCCTTAGTGCAGAC                     | GGCCAGGACGGAGAAGAGT                      |
| 11. | mTNF $\alpha$      | CACAGAAAGCATGATCCGCGACGT                 | CGGCAGAGAGGAGGTTGACTTTCT                 |
| 12. | mIL6               | GAGAGGAGACTTCACAGAGGATAC                 | GTACTCCAGAAGACCAGAGG                     |
| 13. | mIL10              | TTTGAATTCCCTGGGTGAGAA                    | GGAGAAATCGATGACAGCGC                     |
| 14. | mLep               | GTGGCTTTGGTCCTATCTGTC                    | CGTGTGTGAAATGTCATTGATCC                  |
| 15. | mPparg             | TCGCTGATGCACTGCCTATG                     | GAGAGGTCCACAGAGCTGATT                    |
| 16. | mSrebf1            | TGACCCGGCTATTCCGTGA                      | CTGGGCTGAGCAATACAGTTC                    |
| 17. | mTg                | TGTGGGTCTCTACTTTGTTGAGC                  | CGGAGTGGCTGTGCATCTAC                     |
| 18. | mB2m               | TTCTGGTGCTTGTCTCACTGA                    | CAGTATGTTCCGGCTTCCCATT                   |
| 19. | mINS1              | CACTTCCTACCCCTGCTGG                      | ACCACAAAGATGCTGTTTGACA                   |
| 20. | miR-375            | TTTGTTTCGTTCCGGCTCGCGTGA                 | Qiagen Universal primer                  |
| 21. | 16S                | AGGAACTCCGATTGCGAAGG                     | TCGGTTTACTGCGTGGACTACC                   |
| 22. | Ppia               | GAGCTGTTTGCAGACAAAGTTC                   | CCCTGGCACATGAATCCTGG                     |

**Supplementary Table 6. List of antibodies used in the study**

| S. No. | Target         | Source            | Cat. No.   | Application                    |
|--------|----------------|-------------------|------------|--------------------------------|
| 1.     | AHR            | Santacruz         | sc133088   | Western blot                   |
| 2.     | pAHR           | ThermoScientific  | PA5-38404  | Western blot/IF                |
| 3.     | pIRS-2         | Abcam             | Ab3690     | Western blot                   |
| 4.     | CD63           | Biologend         | 143902     | Western blot/Flow cytometry/IF |
| 5.     | CD63           | Novus Biologicals | NBP2-32830 | Pull down                      |
| 6.     | A33            | Biorybt           | orb15687   | Western blot/Flow cytometry    |
| 7.     | PEMT           | ThermoScientific  | PA5-42383  | Western blot                   |
| 8.     | Albumin        | Cell Signaling    | 4929S      | Western blot/IF                |
| 9.     | F4/80          | ThermoScientific  | 11-4801-82 | Flow cytometry                 |
| 10.    | F4/80          | Abcam             | Ab240946   | IF                             |
| 11.    | TNF- $\alpha$  | ThermoScientific  | 39-8321-60 | ELISA                          |
| 12.    | TNF- $\alpha$  | R&D Systems       | AF-410-SP  | Neutralization                 |
| 13.    | IL-6           | R&D Systems       | MAB406     | ELISA                          |
| 14.    | IL-6           | R&D Systems       | MAB406     | Neutralization                 |
| 15.    | CD14           | eBioscience       | 12-0141-81 | Flow cytometry                 |
| 16.    | GAPDH          | Santacruz         | sc47724    | Western blot                   |
| 17.    | Histone        | Santacruz         | sc10807    | Western blot                   |
| 18.    | $\beta$ -Actin | Santacruz         | sc47778    | Western blot                   |
| 19.    | IgG            | Santacruz         | sc65662    | Pull down                      |
| 20.    | MHCII          | Abcam             | Ab180779   | Western blot                   |
| 21.    | CD9            | Abcam             | Ab92726    | Western blot                   |
| 22.    | CD81           | Abcam             | Ab109201   | Western blot                   |
| 23.    | CD31           | Abcam             | Ab24590    | IF                             |
| 24.    | LVYE-1         | ThermoScientific  | 14-0443-82 | IF                             |
| 25.    | PI3K           | Epitomics         | 3295-1     | Western blot                   |
| 26.    | AKT            | NEB               | 9272       | Western blot                   |
| 27.    | pAKT           | Epitomics         | 2118-1     | Western blot                   |

**Supplementary Table 7. Kits and Array used in the study**

|                         |             |            |
|-------------------------|-------------|------------|
| Mouse miRNA array       | Qiagen      | 331223     |
| Cytokine array          | R&D systems | AY028      |
| Insulin Signaling array | Qiagen      | PAMM-030ZE |

**Supplementary Table 8. Summary of the statistics for the figures with statistical significance**

| Figure               | Statistical method                            | Statistical significance between groups    |
|----------------------|-----------------------------------------------|--------------------------------------------|
| Fig. 1b              | Two-tailed <i>t</i> test                      | L-Exo vs H-Exo                             |
| Fig. 1d              | Two-tailed <i>t</i> test                      | L-Exo vs H-Exo                             |
| Fig. 1f              | Two-tailed <i>t</i> test                      | Healthy-Exo vs T2D-Exo                     |
| Fig. 2a, b & c       | One-way ANOVA with a Bonferroni post hoc test | * PBS vs H-Exo                             |
| Figure 2d-i          | Two-way ANOVA with a Tukey post hoc test      | As indicated in figure panels              |
| Fig. 2j              | One-way ANOVA with a Bonferroni post hoc test | * PBS vs T2D-Exo                           |
| Fig. 2k; left panel  | One-way ANOVA with a Bonferroni post hoc test | * PBS vs H-Exo                             |
| Fig. 2k; right panel | One-way ANOVA with a Bonferroni post hoc test | * PBS vs T2D-Exo                           |
| Fig. 2l              | One-way ANOVA with a Bonferroni post hoc test | * PBS vs H-Exo 12M Ab <sup>-</sup>         |
| Fig. 2m              | One-way ANOVA with a Bonferroni post hoc test | * PBS vs L-Exo <sup>lipids PC+</sup>       |
| Fig. 3b & c          | Two-tailed <i>t</i> test                      | L-Exo vs H-Exo                             |
| Fig. 5k GTT          | One-way ANOVA with a Bonferroni post hoc test | * AhRKO H-Exo vs WT H-Exo                  |
| Fig. 5k ITT          | One-way ANOVA with a Bonferroni post hoc test | * AhRKO H-Exo vs WT H-Exo                  |
| Fig. 5n              | Student <i>t</i> test (Two-tailed)            | * AhRKO Ad-GFP-H-Exo vs AhRKO Ad-AhR-H-Exo |

**Supplemental Reference**

- <sup>11</sup> Coliva, G. *et al.* Sphingomyelins Prevent Propagation of Lipid Peroxidation-LC-MS/MS Evaluation of Inhibition Mechanisms. *Molecules* **25**, doi:10.3390/molecules25081925 (2020).
