# Supplementary material for: High-fat diet-induced upregulation of exosomal phosphatidylcholine contributes to insulin resistance
Source: PubMed Central journal article supplement (PMC7801461; doi:10.1038/s41467-020-20500-w), 2021-01-11
Supplement: 41467_2020_20500_MOESM3_ESM.pdf [file 41467_2020_20500_MOESM3_ESM.pdf]

### **Description of Additional Supplementary Files**

File Name: Supplementary Data 1

Description: Lipids detected by triple quadrupole MS in plasma exosomes (PL Exo) and FACS sorted A33+ IEC cells from RCD and HFD mice (12 months of their respective diets)

File Name: Supplementary Data 2

Description: Plasma insulin concentration (ng/ml) during GTT.

File Name: Supplementary Data 3

Description: Lipids detected by triple quadrupole MS in TLC extracted remainder lipids after PC band depletion and PC band.

File Name: Supplementary Data 4

Description: Cytokine array performed for plasma and white adipose tissue extracts derived from mice treated with L-Exo or H-Exo.

File Name: Supplementary Data 5

Description: The lipids identified by lipidomics analysis with all of the relevant information.
